# Supplementary material for: Retinoblastoma protein regulates carcinogen susceptibility at heterochromatic cancer driver loci
Source: Life Sci Alliance. 2022 Jan 4;5(4):e202101134. doi: 10.26508/lsa.202101134 (PMC8739494; doi:10.26508/lsa.202101134)
Supplement: Supplementary file 3 [file LSA-2021-01134_SdataF5.xlsx]

## Sheet: dataset_EV2
seqnames	start	end	ensembl_gene_id	hgnc_symbol.x	is_cancer_driver	dist_to_centro_telo	percent_CtoT	melanoma_mutation_rate
chr15	20737094	20747114	ENSG00000215405	GOLGA6L6	FALSE	737094	0.833333	0.0214286
chr15	21004687	21005367	ENSG00000268343		FALSE	1004687	1	0.0142857
chr15	21040701	21071643	ENSG00000230031	POTEB2	FALSE	1040701	0.823529	NA
chr15	49280673	49338760	ENSG00000138593	SECISBP2L	FALSE	29280673	0.66	0.0285714
chr15	22011370	22012050	ENSG00000268531		FALSE	2011370	0.5	0.00714286
chr15	22051853	22083227	ENSG00000233917	POTEB	FALSE	2051853	0.869048	NA
chr21	10906201	11029719	ENSG00000166157	TPTE	TRUE	258410	0.868016	0.342857
chr21	14741931	14745386	ENSG00000256715		FALSE	453802	0.807692	NA
chr21	14982498	15013906	ENSG00000166351	POTED	FALSE	694369	0.831169	0.0214286
chr21	15051621	15053459	ENSG00000269011		FALSE	763492	NA	NA
chr18	13217497	13652754	ENSG00000168675	LDLRAD4	FALSE	1808144	0.847896	0.0214286
chr21	15481134	15583166	ENSG00000188992	LIPI	FALSE	1193005	0.849408	0.05
chr21	15588451	15600693	ENSG00000185272	RBM11	FALSE	1300322	0.851064	0.0714286
chr15	22368478	22369561	ENSG00000182974	OR4M2	FALSE	2368478	0.875	0.185714
chr15	22382382	22383507	ENSG00000183706	OR4N4	FALSE	2382382	0.809524	0.0785714
chr15	22456895	22460351	ENSG00000269182		FALSE	2456895	0.811594	NA
chr21	15743436	15755805	ENSG00000155304	HSPA13	FALSE	1455307	0.796296	0.0142857
chr15	22736246	22746002	ENSG00000197414	GOLGA6L1	FALSE	2736246	0.909091	0.0357143
chr15	49398268	49447858	ENSG00000166200	COPS2	FALSE	29398268	0.673684	0.00714286
chr21	15857549	15955723	ENSG00000155307	SAMSN1	FALSE	1569420	0.83975	0.128571
chr21	15964251	16031142	ENSG00000243440		FALSE	1676122	0.871201	0.0571429
chr15	22833395	22873892	ENSG00000153575	TUBGCP5	FALSE	2833395	0.742268	0.05
chr21	16333556	16437321	ENSG00000180530	NRIP1	FALSE	2045427	0.681416	0.0285714
chr15	41028082	41048049	ENSG00000137824	RMDN3	FALSE	21028082	0.810811	0.00714286
chr15	62929371	62937490	ENSG00000259458		FALSE	39583902	0.75	0.00714286
chr15	41056218	41059906	ENSG00000137880	GCHFR	FALSE	21056218	1	NA
chr15	41060067	41099675	ENSG00000104129	DNAJC17	FALSE	21060067	0.79798	0.0142857
chr18	13663346	13726662	ENSG00000177150	FAM210A	FALSE	1734236	0.765517	NA
chr21	17102344	17252377	ENSG00000155313	USP25	FALSE	2814215	0.675824	0.0357143
chr18	44259081	44339220	ENSG00000101638	ST8SIA5	FALSE	25798183	0.886364	0.0642857
chr21	18811208	18821503	ENSG00000232560	C21orf37	FALSE	4523079	0.895522	0.00714286
chr21	18884700	18965897	ENSG00000154639	CXADR	FALSE	4596571	0.852194	0.0357143
chr18	13726659	13764557	ENSG00000101654	RNMT	FALSE	1696341	0.795181	0.0142857
chr18	44388353	44500123	ENSG00000078043	PIAS2	FALSE	25927455	0.78022	0.0214286
chr15	49447853	49660066	ENSG00000156958	GALK2	FALSE	29447853	0.759729	0.0285714
chr21	18965971	18985265	ENSG00000154640	BTG3	FALSE	4677842	0.575758	0.00714286
chr15	41062159	41064643	ENSG00000188277	C15orf62	FALSE	21062159	0.888889	0.0142857
chr20	44165625	44176065	ENSG00000249139	EPPIN-WFDC6	FALSE	14796056	0.91954	0.0214286
chr20	44179792	44207965	ENSG00000158901	WFDC8	FALSE	14810223	0.875421	0.0285714
chr15	63334831	63364114	ENSG00000140416	TPM1	FALSE	39157278	0.850877	0.0357143
chr20	44236578	44259907	ENSG00000180205	WFDC9	FALSE	14867009	0.828221	0.0214286
chr21	19161284	19191703	ENSG00000154642	C21orf91	FALSE	4873155	0.676056	0.00714286
chr15	91073157	91188577	ENSG00000140577	CRTC3	TRUE	11332815	0.813953	0.0428571
chr15	41099284	41106767	ENSG00000166140	ZFYVE19	FALSE	21099284	1	0.00714286
chr20	54967427	54979518	ENSG00000101138	CSTF1	FALSE	8036002	0.8125	0.0214286
chr21	19273580	19639690	ENSG00000154645	CHODL	FALSE	4985451	0.872627	0.0857143
chr20	44258165	44259835	ENSG00000180305	WFDC10A	FALSE	14888596	1	NA
chr15	22892005	23006016	ENSG00000068793	CYFIP1	FALSE	2892005	0.761719	0.0357143
chr20	44277202	44298909	ENSG00000180083	WFDC11	FALSE	14907633	0.868421	NA
chr20	44313292	44333658	ENSG00000182931	WFDC10B	FALSE	14943723	0.845815	0.0285714
chr21	19641433	19858197	ENSG00000154646	TMPRSS15	TRUE	5353304	0.810619	0.1
chr20	44330655	44337456	ENSG00000168634	WFDC13	FALSE	14961086	0.865169	0.00714286
chr20	44350990	44354469	ENSG00000149651	SPINT4	FALSE	14981421	0.933333	0.0142857
chr20	2639041	2644865	ENSG00000101365	IDH3B	FALSE	2629041	0.857143	NA
chr18	44497455	44627658	ENSG00000167216	KATNAL2	FALSE	26036557	0.85042	0.0357143
chr20	44376583	44420571	ENSG00000124116	WFDC3	FALSE	15007014	0.906897	0.0142857
chr20	54987168	55034396	ENSG00000087589	CASS4	FALSE	7981124	0.86194	0.1
chr21	22370633	22915650	ENSG00000154654	NCAM2	FALSE	8082504	0.754056	0.0642857
chr15	41107650	41120907	ENSG00000166143	PPP1R14D	FALSE	21107650	0.898305	0.00714286
chr15	49619159	49913128	ENSG00000166262	FAM227B	FALSE	29619159	0.84417	0.0571429
chr18	13824154	13826861	ENSG00000176136	MC5R	FALSE	1634037	1	0.0285714
chr18	13882043	13915706	ENSG00000185231	MC2R	FALSE	1545192	0.878728	0.0285714
chr15	63413999	63434260	ENSG00000103642	LACTB	FALSE	39087132	0.702703	0.00714286
chr15	91260558	91358859	ENSG00000197299	BLM	TRUE	11162533	0.822034	0.05
chr21	26957968	26979829	ENSG00000154719	MRPL39	FALSE	12669839	0.761905	NA
chr18	14057456	14132489	ENSG00000175322	ZNF519	FALSE	1328409	0.807407	0.0214286
chr20	57570240	57582302	ENSG00000101160	CTSZ	FALSE	5433218	0.846154	0.0142857
chr20	55043647	55093943	ENSG00000022277	RTFDC1	FALSE	7921577	0.813433	0.0142857
chr15	41136216	41150405	ENSG00000166145	SPINT1	FALSE	21136216	0.901961	0.0214286
chr20	2673524	2740753	ENSG00000088881	EBF4	FALSE	2663524	0.884097	0.05
chr20	57594309	57601709	ENSG00000101162	TUBB1	FALSE	5413811	0.526316	0.0285714
chr15	49715293	49780972	ENSG00000140285	FGF7	FALSE	29715293	0.80402	0.0142857
chr18	14507338	14543584	ENSG00000183206	POTEC	FALSE	917314	0.874172	0.0785714
chr20	44420576	44440066	ENSG00000101457	DNTTIP1	FALSE	15051007	0.846154	0.0142857
chr18	44542731	44544607	ENSG00000266996	TCEB3CL2	FALSE	26081833	1	0.00714286
chr21	27011584	27089874	ENSG00000154721	JAM2	FALSE	12723455	0.856549	0.0357143
chr20	57600522	57607437	ENSG00000124172	ATP5E	FALSE	5408083	0.869565	NA
chr18	44548658	44550534	ENSG00000234298	TCEB3CL	FALSE	26087760	NA	NA
chr15	63418071	63450220	ENSG00000185088	RPS27L	FALSE	39071172	0.610169	NA
chr18	44554573	44556449	ENSG00000183791	TCEB3C	FALSE	26093675	1	0.0357143
chr18	44558943	44561988	ENSG00000206181	TCEB3B	FALSE	26098045	0.918367	0.157143
chr9	116237	118417	ENSG00000170122	FOXD4	FALSE	106237	0.5	0.0142857
chr15	63481668	63559981	ENSG00000166128	RAB8B	FALSE	38961411	0.739645	0.0142857
chr20	44441215	44445596	ENSG00000175063	UBE2C	FALSE	15071646	0.769231	NA
chr20	55066548	55100981	ENSG00000124091	GCNT7	FALSE	7914539	0.770833	NA
chr20	57608200	57617964	ENSG00000101166	SLMO2	FALSE	5397556	0.73913	0.00714286
chr18	44633774	44676891	ENSG00000167220	HDHD2	FALSE	26172876	0.724138	0.0214286
chr21	27088815	27107984	ENSG00000154723	ATP5J	FALSE	12800686	0.710526	0.00714286
chr9	125677845	125693779	ENSG00000171448	ZBTB26	FALSE	15509652	0.6	0.0214286
chr20	55092243	55101198	ENSG00000124103	FAM209A	FALSE	7914322	0.766667	NA
chr15	49913177	49937333	ENSG00000104047	DTWD1	FALSE	29913177	0.698413	NA
chr20	2774715	2781283	ENSG00000088882	CPXM1	FALSE	2764715	0.979167	0.0785714
chr20	55108302	55111576	ENSG00000213714	FAM209B	FALSE	7903944	0.818182	0.0357143
chr15	41164412	41166487	ENSG00000104140	RHOV	FALSE	21164412	1	0.00714286
chr15	91411822	91426688	ENSG00000140564	FURIN	FALSE	11094704	0.911765	0.0285714
chr15	23004684	23034427	ENSG00000140157	NIPA2	FALSE	3004684	0.851852	NA
chr18	44661027	44702652	ENSG00000267228		FALSE	26200129	0.688312	0.00714286
chr21	27106881	27144771	ENSG00000154727	GABPA	FALSE	12818752	0.772152	0.0142857
chr20	55204358	55214339	ENSG00000087510	TFAP2C	FALSE	7801181	0.880952	0.0214286
chr20	57766075	57834168	ENSG00000124203	ZNF831	FALSE	5181352	0.889043	0.285714
chr20	44451853	44462384	ENSG00000101470	TNNC2	FALSE	15082284	0.782609	0.00714286
chr15	41186628	41196173	ENSG00000104142	VPS18	FALSE	21186628	0.866667	0.0142857
chr15	63568217	63601325	ENSG00000138613	APH1B	FALSE	38920067	0.810127	0.0214286
chr9	125703112	125867145	ENSG00000011454	RABGAP1	FALSE	15336286	0.746622	0.0214286
chr18	44681413	44702745	ENSG00000134049	IER3IP1	FALSE	26220515	0.657895	0.00714286
chr20	57875482	57901047	ENSG00000124205	EDN3	FALSE	5114473	0.886792	0.05
chr15	41221538	41231237	ENSG00000128917	DLL4	FALSE	21221538	0.829787	0.0357143
chr20	2795614	2800930	ENSG00000198326	TMEM239	FALSE	2785614	0.933333	NA
chr20	2795614	2798712	ENSG00000241690		FALSE	2785614	0.944444	NA
chr18	14728271	14852737	ENSG00000180777	ANKRD30B	FALSE	608161	0.835071	0.185714
chr20	55743804	55841685	ENSG00000101144	BMP7	FALSE	7173835	0.912568	0.05
chr18	44746293	44775554	ENSG00000215474	SKOR2	FALSE	26285395	0.858974	0.0571429
chr20	2795633	2796479	ENSG00000258713	C20orf141	FALSE	2785633	1	0.0142857
chr9	125796806	125797975	ENSG00000188394	GPR21	FALSE	15405456	1	NA
chr9	121041	188979	ENSG00000172785	CBWD1	FALSE	111041	0.772727	0.00714286
chr20	2815960	2821836	ENSG00000132635	PCED1A	FALSE	2805960	0.8	0.00714286
chr18	45357922	45457515	ENSG00000175387	SMAD2	TRUE	26897024	0.645833	0.0142857
chr15	50150435	50475014	ENSG00000104043	ATP8B4	FALSE	30150435	0.877157	0.15
chr9	125871779	126030855	ENSG00000165209	STRBP	FALSE	15172576	0.807388	0.0285714
chr15	91426925	91439006	ENSG00000182511	FES	TRUE	11082386	0.947368	0.0214286
chr15	23043277	23100005	ENSG00000170113	NIPA1	FALSE	3043277	0.773723	NA
chr20	55904815	55919050	ENSG00000054796	SPO11	FALSE	7096470	0.844156	0.0357143
chr15	63613577	63674360	ENSG00000074410	CA12	FALSE	38847032	0.860544	0.0214286
chr20	58152564	58422766	ENSG00000087495	PHACTR3	FALSE	4592754	0.842969	0.0642857
chr9	213108	215893	ENSG00000183784	C9orf66	FALSE	203108	1	NA
chr18	18526867	18691812	ENSG00000067900	ROCK1	FALSE	65969	0.737569	0.0214286
chr15	41245160	41248710	ENSG00000128965	CHAC1	FALSE	21245160	0.857143	0.00714286
chr20	44462449	44471914	ENSG00000124104	SNX21	FALSE	15092880	0.818182	NA
chr9	126118449	126142603	ENSG00000148204	CRB2	FALSE	15060828	0.871795	0.0642857
chr20	55926066	55954267	ENSG00000101146	RAE1	FALSE	7061253	0.817073	0.00714286
chr20	2821349	2847378	ENSG00000215305	VPS16	FALSE	2811349	0.90625	0.0214286
chr15	23255242	23268823	ENSG00000153666	GOLGA8I	FALSE	3255242	0.777778	0.0357143
chr21	27252861	27543446	ENSG00000142192	APP	FALSE	12964732	0.744361	0.0142857
chr20	44470360	44486045	ENSG00000101473	ACOT8	FALSE	15100791	0.677419	0.00714286
chr15	41271078	41408552	ENSG00000128908	INO80	TRUE	21271078	0.799353	0.0571429
chr15	50474393	50528592	ENSG00000140284	SLC27A2	FALSE	30474393	0.895981	0.05
chr13	19747910	19755992	ENSG00000198033	TUBA3C	FALSE	747910	0.930435	0.0785714
chr13	19756173	19761496	ENSG00000121388		FALSE	756173	0.878788	NA
chr20	55933496	55934878	ENSG00000256222	MTRNR2L3	FALSE	7080642	0.833333	NA
chr20	55966463	55984389	ENSG00000132819	RBM38	TRUE	7031131	0.885246	0.0285714
chr9	214854	465259	ENSG00000107099	DOCK8	FALSE	204854	0.81626	0.1
chr9	126141933	126692431	ENSG00000119522	DENND1A	FALSE	14511000	0.812693	0.0571429
chr18	18822203	19105378	ENSG00000141449	GREB1L	FALSE	361305	0.828514	0.192857
chr21	27838528	27945603	ENSG00000166265	CYYR1	FALSE	13550399	0.867566	0.0642857
chr20	58438618	58508710	ENSG00000196074	SYCP2	FALSE	4506810	0.707143	0.0642857
chr15	50534144	50558223	ENSG00000140287	HDC	FALSE	30534144	0.923567	0.1
chr13	19997017	20110903	ENSG00000132958	TPTE2	TRUE	997017	0.880621	0.0857143
chr15	63796793	63886839	ENSG00000140455	USP3	FALSE	38634553	0.719745	0.0214286
chr18	45553044	45937123	ENSG00000184828	ZBTB7C	FALSE	27092146	0.89669	0.0857143
chr21	28208066	28217728	ENSG00000154734	ADAMTS1	FALSE	13919937	0.75	0.0142857
chr9	126763949	126795580	ENSG00000106689	LHX2	FALSE	14407851	0.858824	0.00714286
chr15	23405069	23414193	ENSG00000259455		FALSE	3405069	0.846154	0.0357143
chr21	28290231	28338832	ENSG00000154736	ADAMTS5	FALSE	14002102	0.783186	0.0714286
chr15	23599895	23612378	ENSG00000261739	GOLGA8S	FALSE	3599895	0.807692	0.0142857
chr13	20207788	20247599	ENSG00000196199	MPHOSPH8	FALSE	1207788	0.654545	0.0142857
chr15	41474923	41522941	ENSG00000178997	EXD1	FALSE	21474923	0.868293	0.0214286
chr21	30244513	30257693	ENSG00000156239	N6AMT1	FALSE	15956384	0.73913	0.00714286
chr15	91445448	91465814	ENSG00000196547	MAN2A2	FALSE	11055578	0.710526	0.0428571
chr9	470291	746105	ENSG00000107104	KANK1	FALSE	460291	0.814578	NA
chr13	20248896	20357142	ENSG00000121390	PSPC1	FALSE	1248896	0.696078	0.0285714
chr15	23684645	23692381	ENSG00000174450	GOLGA6L2	FALSE	3684645	0.907692	0.178571
chr18	45778672	45779208	ENSG00000268960		FALSE	27317774	0.833333	0.0357143
chr13	20268547	20269240	ENSG00000269591		FALSE	1268547	NA	NA
chr9	127019885	127115586	ENSG00000119408	NEK6	FALSE	14087845	0.817204	0.00714286
chr9	841690	969090	ENSG00000137090	DMRT1	FALSE	831690	0.87619	0.0571429
chr15	50569389	50647605	ENSG00000104064	GABPB1	FALSE	30569389	0.790323	0.00714286
chr15	23810454	23873064	ENSG00000179455	MKRN3	FALSE	3810454	0.830645	0.05
chr18	46065417	46389588	ENSG00000134030	CTIF	FALSE	27604519	0.853456	0.0428571
chr9	976964	991731	ENSG00000064218	DMRT3	FALSE	966964	0.839506	0.0357143
chr13	20397622	20437776	ENSG00000132950	ZMYM5	FALSE	1397622	0.74026	0.0214286
chr22	23915312	23922495	ENSG00000128322	IGLL1	FALSE	7915312	0.859649	0.0142857
chr21	30300466	30365270	ENSG00000198862	LTN1	FALSE	16012337	0.715328	0.0642857
chr15	23888691	23891175	ENSG00000254585	MAGEL2	FALSE	3888691	0.818182	0.0928571
chr15	23930565	23932450	ENSG00000182636	NDN	FALSE	3930565	0.944444	0.0571429
chr20	44486256	44507761	ENSG00000132801	ZSWIM3	FALSE	15116687	0.842105	0.0285714
chr9	127115745	127177723	ENSG00000136930	PSMB7	FALSE	14025708	0.791667	NA
chr15	24920541	24928593	ENSG00000185823	NPAP1	FALSE	4920541	0.922156	0.228571
chr9	1050354	1057552	ENSG00000173253	DMRT2	FALSE	1040354	0.892857	0.0428571
chr20	44509866	44513905	ENSG00000168612	ZSWIM1	FALSE	15140297	0.75	NA
chr20	56071035	56100708	ENSG00000124092	CTCFL	FALSE	6914812	0.841346	0.0928571
chr15	41523037	41574043	ENSG00000187446	CHP1	FALSE	21523037	0.834711	NA
chr20	44515128	44516274	ENSG00000149634	SPATA25	FALSE	15145559	1	0.0142857
chr20	44517264	44519926	ENSG00000124257	NEURL2	FALSE	15147695	0.857143	0.0214286
chr9	127213423	127239379	ENSG00000180264	GPR144	FALSE	13964052	0.9	0.0357143
chr15	41601466	41624819	ENSG00000104147	OIP5	FALSE	21601466	0.724138	NA
chr22	23950639	23974508	ENSG00000189269	C22orf43	FALSE	7950639	0.883495	0.0285714
chr21	30376705	30391699	ENSG00000156253	RWDD2B	FALSE	16088576	0.777778	NA
chr9	127243516	127269709	ENSG00000136931	NR5A1	FALSE	13933722	0.918919	0.0357143
chr18	46446223	46477081	ENSG00000101665	SMAD7	FALSE	27985325	0.850746	0.00714286
chr20	58508819	58523735	ENSG00000196227	FAM217B	FALSE	4491785	0.7	0.0214286
chr20	2844830	3019722	ENSG00000132670	PTPRA	FALSE	2834830	0.791878	0.0214286
chr20	58511894	58515352	ENSG00000132825	PPP1R3D	FALSE	4500168	0.666667	NA
chr15	25068794	25223870	ENSG00000128739	SNRPN	FALSE	5068794	0.878726	0.0428571
chr9	127279554	127533589	ENSG00000148200	NR6A1	FALSE	13669842	0.776062	NA
chr20	58533471	58609066	ENSG00000124215	CDH26	FALSE	4406454	0.835853	0.0928571
chr22	24030323	24041363	ENSG00000159496	RGL4	FALSE	8030323	0.803922	0.0285714
chr20	44518783	44527459	ENSG00000064601	CTSA	FALSE	15149214	0.904762	0.00714286
chr9	127539437	127577164	ENSG00000185585	OLFML2A	FALSE	13626267	0.865546	0.0285714
chr21	30396950	30426809	ENSG00000156256	USP16	FALSE	16108821	0.746269	0.0214286
chr18	19109242	19180845	ENSG00000141446	ESCO1	FALSE	648344	0.76	0.0357143
chr13	20532810	20665968	ENSG00000121741	ZMYM2	TRUE	1532810	0.749141	0.05
chr15	41624892	41673248	ENSG00000137804	NUSAP1	FALSE	21624892	0.795699	0.0142857
chr15	63889552	63894627	ENSG00000197361	FBXL22	FALSE	38626765	0.75	0.00714286
chr9	127615755	127620160	ENSG00000136918	WDR38	FALSE	13583271	0.75	0.00714286
chr9	2015342	2193624	ENSG00000080503	SMARCA2	TRUE	2005342	0.768116	0.0571429
chr9	127620159	127624260	ENSG00000136942	RPL35	FALSE	13579171	1	NA
chr9	127624409	127640003	ENSG00000136950	ARPC5L	FALSE	13563428	0.727273	NA
chr20	58630980	58648008	ENSG00000176659	C20orf197	FALSE	4367512	0.910828	0.0142857
chr22	24083769	24093279	ENSG00000187792	ZNF70	FALSE	8083769	0.891892	0.0142857
chr18	19192228	19210417	ENSG00000167088	SNRPD1	FALSE	731330	0.708333	NA
chr22	24094930	24096655	ENSG00000128218	VPREB3	FALSE	8094930	0.857143	NA
chr15	50716577	50793280	ENSG00000138592	USP8	TRUE	30716577	0.78481	0.0428571
chr20	59827482	60515673	ENSG00000179242	CDH4	FALSE	2499847	0.907619	0.107143
chr9	127640646	127710771	ENSG00000136935	GOLGA1	FALSE	13492660	0.823129	0.0357143
chr22	24105208	24108048	ENSG00000169314	C22orf15	FALSE	8105208	1	0.0142857
chr8	8993765	9009084	ENSG00000173281	PPP1R3B	FALSE	8983765	0.666667	NA
chr15	63900817	64126141	ENSG00000103657	HERC1	FALSE	38395251	0.77821	0.107143
chr8	9009252	9025646	ENSG00000253426		FALSE	8999252	0.933333	NA
chr18	19230858	19284766	ENSG00000158201	ABHD3	FALSE	769960	0.768421	0.0142857
chr22	24108021	24110630	ENSG00000250479	CHCHD10	FALSE	8108021	1	0.0142857
chr20	56136136	56141513	ENSG00000124253	PCK1	FALSE	6874007	0.861538	0.0785714
chr13	20712394	20735188	ENSG00000121743	GJA3	FALSE	1712394	0.860215	0.0357143
chr18	46570039	46987717	ENSG00000141627	DYM	FALSE	28109141	0.788705	0.0142857
chr13	20761609	20767037	ENSG00000165474	GJB2	FALSE	1761609	0.916667	0.00714286
chr15	91473410	91497323	ENSG00000140553	UNC45A	FALSE	11024069	0.791667	0.0285714
chr22	24110413	24126503	ENSG00000099953	MMP11	FALSE	8110413	0.83871	0.0214286
chr20	60292562	60294804	ENSG00000179253		FALSE	2720716	0.944444	NA
chr13	20796110	20806534	ENSG00000121742	GJB6	FALSE	1796110	0.907895	0.0214286
chr9	127704887	127905785	ENSG00000173611	SCAI	FALSE	13297646	0.782609	0.0357143
chr21	30428126	30446118	ENSG00000156261	CCT8	FALSE	16139997	0.590909	NA
chr22	24124467	24126145	ENSG00000267954		FALSE	8124467	1	0.0142857
chr15	25200133	25223729	ENSG00000273173		FALSE	5200133	0.890845	0.00714286
chr8	9413424	9639856	ENSG00000173273	TNKS	FALSE	9403424	0.722922	0.0214286
chr20	60528525	60640866	ENSG00000130699	TAF4	FALSE	2374654	0.86262	0.0214286
chr9	2621834	2660053	ENSG00000147852	VLDLR	FALSE	2611834	0.836364	0.0142857
chr13	20977806	21099996	ENSG00000165475	CRYL1	FALSE	1977806	0.84326	0.0214286
chr15	64199235	64364232	ENSG00000035664	DAPK2	FALSE	38157160	0.872515	0.0357143
chr15	41679551	41694717	ENSG00000137806	NDUFAF1	FALSE	21679551	0.806452	0.0214286
chr22	24129150	24176703	ENSG00000099956	SMARCB1	TRUE	8129150	0.84127	0.0214286
chr18	47008028	47013622	ENSG00000177576	C18orf32	FALSE	28547130	0.8	0.00714286
chr20	3024268	3026393	ENSG00000125787	GNRH2	FALSE	3014268	0.888889	0.00714286
chr9	127908852	127952218	ENSG00000119414	PPP6C	TRUE	13251213	0.794872	0.0571429
chr15	41700606	41775761	ENSG00000137815	RTF1	FALSE	21700606	0.760274	NA
chr18	19284918	19450918	ENSG00000101752	MIB1	FALSE	824020	0.742188	0.0357143
chr20	56178902	56195632	ENSG00000124256	ZBP1	FALSE	6819888	0.911111	0.0714286
chr15	64364758	64386217	ENSG00000166797	FAM96A	FALSE	38135175	0.734694	0.00714286
chr22	24176690	24181315	ENSG00000099958	DERL3	FALSE	8176690	1	NA
chr9	2717502	2730037	ENSG00000168263	KCNV2	FALSE	2707502	0.772727	0.0214286
chr18	47008051	47017956	ENSG00000215472	RPL17-C18orf32	FALSE	28547153	0.75	0.0142857
chr20	3026591	3028900	ENSG00000125901	MRPS26	FALSE	3016591	1	0.00714286
chr20	3052266	3053163	ENSG00000101405	OXT	FALSE	3042266	1	0.00714286
chr20	60697517	60710434	ENSG00000149657	LSM14B	FALSE	2305086	0.608696	0.0142857
chr15	50792759	50838905	ENSG00000170236	USP50	FALSE	30792759	0.773333	0.0142857
chr20	3063202	3065370	ENSG00000101200	AVP	FALSE	3053202	1	0.00714286
chr9	127962821	127996437	ENSG00000136933	RABEPK	FALSE	13206994	0.759494	0.0214286
chr8	38120648	38126761	ENSG00000147535	PPAPDC1B	FALSE	5712126	0.333333	0.00714286
chr9	2720469	2844241	ENSG00000080608	KIAA0020	FALSE	2710469	0.748718	NA
chr13	21140585	21265503	ENSG00000032742	IFT88	FALSE	2140585	0.8	0.0142857
chr9	127997132	128003609	ENSG00000044574	HSPA5	FALSE	13199822	1	NA
chr21	30449792	30548210	ENSG00000156265	MAP3K7CL	FALSE	16161663	0.840194	0.0428571
chr15	25200181	25245423	ENSG00000214265	SNURF	FALSE	5200181	0.857708	0.00714286
chr20	56223448	56286592	ENSG00000124225	PMEPA1	FALSE	6728928	0.87957	0.0428571
chr8	9911778	10286401	ENSG00000175806	MSRA	FALSE	9901778	0.812715	NA
chr13	21276266	21297237	ENSG00000172458	IL17D	FALSE	2276266	0.779661	NA
chr15	64386322	64438289	ENSG00000028528	SNX1	FALSE	38083103	0.844444	0.0214286
chr22	24198890	24228496	ENSG00000133460	SLC2A11	FALSE	8198890	0.878788	0.0214286
chr15	50844670	50979012	ENSG00000092439	TRPM7	FALSE	30844670	0.754647	0.0857143
chr4	16162128	16229033	ENSG00000169762	TAPT1	FALSE	16152128	0.675439	0.00714286
chr13	21302870	21348097	ENSG00000150456	N6AMT2	FALSE	2302870	0.81746	0.00714286
chr18	47014851	47018906	ENSG00000265681	RPL17	FALSE	28553953	0.8	0.0142857
chr20	60711791	60718496	ENSG00000101182	PSMA7	FALSE	2297024	0.583333	NA
chr15	25582381	25684128	ENSG00000114062	UBE3A	FALSE	5582381	0.690722	0.0428571
chr8	86126311	86132650	ENSG00000176731	C8orf59	FALSE	39287424	0.428571	NA
chr21	30566392	31003071	ENSG00000156273	BACH1	TRUE	16278263	0.836759	0.0142857
chr20	56725960	56736206	ENSG00000124237	C20orf85	FALSE	6279314	0.892473	0.0142857
chr9	3218297	3526004	ENSG00000080298	RFX3	FALSE	3208297	0.750341	0.0714286
chr20	44527399	44540794	ENSG00000100979	PLTP	FALSE	15157830	0.75	NA
chr15	41785591	41795747	ENSG00000137825	ITPKA	FALSE	21785591	0.966667	0.0142857
chr20	56793551	56803709	ENSG00000124227	ANKRD60	FALSE	6211811	0.932584	0.0357143
chr13	21351469	21477187	ENSG00000132953	XPO4	FALSE	2351469	0.724299	0.0214286
chr18	19668021	19678741	ENSG00000263588		FALSE	1207123	0.885057	0.00714286
chr20	3088219	3140842	ENSG00000185019	UBOX5	FALSE	3078219	0.844444	NA
chr9	3452305	3469181	ENSG00000203286		FALSE	3442305	0.756757	NA
chr8	141541264	141645718	ENSG00000123908	AGO2	FALSE	4708304	0.834507	0.0142857
chr22	24204375	24237410	ENSG00000251357		FALSE	8204375	0.882353	NA
chr8	145674965	145691060	ENSG00000187954	CYHR1	FALSE	662962	0.916667	0.0214286
chr22	24236191	24237414	ENSG00000240972	MIF	FALSE	8236191	1	NA
chr18	19749404	19782491	ENSG00000141448	GATA6	FALSE	1288506	0.873684	0.0428571
chr20	3127165	3140543	ENSG00000215251	FASTKD5	FALSE	3117165	0.875	0.00714286
chr22	24236613	24241117	ENSG00000218537		FALSE	8236613	0.5	NA
chr20	56806188	56884495	ENSG00000124224	PPP4R1L	FALSE	6131025	0.75	0.0214286
chr15	41795836	41806085	ENSG00000062524	LTK	FALSE	21795836	0.90625	0.0285714
chr22	24299601	24303373	ENSG00000133433	GSTT2B	FALSE	8299601	1	NA
chr20	3143263	3154192	ENSG00000088899		FALSE	3133263	0.957447	0.0142857
chr18	19993564	19997878	ENSG00000212710	CTAGE1	FALSE	1532666	0.807692	0.121429
chr9	3824127	4348392	ENSG00000107249	GLIS3	FALSE	3814127	0.847716	0.0928571
chr13	21547171	21635686	ENSG00000150457	LATS2	TRUE	2547171	0.753333	0.0285714
chr22	24309089	24314721	ENSG00000099974	DDTL	FALSE	8309089	0.833333	NA
chr8	10383056	10411676	ENSG00000184647	PRSS55	FALSE	10373056	0.874439	0.0214286
chr20	3170996	3185331	ENSG00000198171	DDRGK1	FALSE	3160996	0.911765	NA
chr22	24313554	24322660	ENSG00000099977	DDT	FALSE	8313554	0.5	NA
chr20	60718822	60757540	ENSG00000184402	SS18L1	TRUE	2257980	0.914286	0.0142857
chr13	21714653	21723221	ENSG00000150459	SAP18	FALSE	2714653	0.785714	NA
chr4	72607410	72669758	ENSG00000145321	GC	FALSE	19947293	0.878882	0.0428571
chr8	10463859	10569697	ENSG00000183638	RP1L1	FALSE	10453859	0.906332	0.257143
chr22	24322339	24326106	ENSG00000099984	GSTT2	FALSE	8322339	0.666667	NA
chr8	10530147	10558103	ENSG00000171060	C8orf74	FALSE	10520147	0.9	0.0285714
chr21	30909254	31312351	ENSG00000171189	GRIK1	FALSE	16621125	0.837781	0.171429
chr20	3189514	3204516	ENSG00000125877	ITPA	FALSE	3179514	0.820513	NA
chr9	128024073	128129486	ENSG00000165219	GAPVD1	FALSE	13073945	0.705882	0.05
chr18	47087069	47119272	ENSG00000101670	LIPG	FALSE	28626171	0.818182	0.0428571
chr13	21727734	21750741	ENSG00000165480	SKA3	FALSE	2727734	0.795455	0.00714286
chr8	10581278	10697357	ENSG00000171056	SOX7	FALSE	10571278	0.813814	0.00714286
chr9	4490444	4587469	ENSG00000106688	SLC1A1	FALSE	4480444	0.819444	0.0285714
chr4	140374386	140397763	ENSG00000172007	RAB33B	FALSE	50746513	0.763158	0.00714286
chr22	24376133	24384680	ENSG00000184674	GSTT1	FALSE	8376133	0.875	NA
chr8	10582909	10697357	ENSG00000258724		FALSE	10572909	0.816265	0.00714286
chr18	20378224	20606451	ENSG00000101773	RBBP8	FALSE	1917326	0.833856	0.0285714
chr15	50999506	51058005	ENSG00000138600	SPPL2A	FALSE	30999506	0.71831	NA
chr15	91474148	91475799	ENSG00000184508	HDDC3	FALSE	11045593	0.5	NA
chr20	56884752	56942563	ENSG00000124209	RAB22A	FALSE	6072957	0.774648	NA
chr8	38127215	38239790	ENSG00000147548	WHSC1L1	FALSE	5599097	0.758621	0.0357143
chr15	64443914	64449680	ENSG00000157734	SNX22	FALSE	38071712	0.916667	0.00714286
chr21	30968360	31003067	ENSG00000183653	GRIK1-AS2	FALSE	16680231	0.895604	NA
chr8	86132816	86196302	ENSG00000185015	CA13	FALSE	39293929	0.820225	0.0285714
chr21	31538241	31538971	ENSG00000156282	CLDN17	FALSE	16580924	1	0.0142857
chr13	21750784	21753223	ENSG00000173141	MRP63	FALSE	2750784	0.75	NA
chr8	10622473	10697394	ENSG00000254093	PINX1	FALSE	10612473	0.81383	0.00714286
chr21	31586324	31588391	ENSG00000156284	CLDN8	FALSE	16531504	0.6	0.00714286
chr21	31653629	31655276	ENSG00000188694	KRTAP24-1	FALSE	16464619	0.9	0.0285714
chr8	145691426	145699585	ENSG00000167702	KIFC2	FALSE	654437	0.821429	0.0285714
chr21	31661463	31661832	ENSG00000232263	KRTAP25-1	FALSE	16458063	0.666667	0.00714286
chr15	91498100	91506349	ENSG00000166965	RCCD1	FALSE	11015043	0.4	NA
chr21	31691452	31692607	ENSG00000197683	KRTAP26-1	FALSE	16427288	0.833333	0.0357143
chr15	64448011	64455404	ENSG00000166794	PPIB	FALSE	38065988	0.888889	0.00714286
chr21	31709331	31710012	ENSG00000206107	KRTAP27-1	FALSE	16409883	0.8	0.00714286
chr21	31720717	31720924	ENSG00000186980	KRTAP23-1	FALSE	16398971	0.666667	0.0142857
chr21	31743709	31744557	ENSG00000182816	KRTAP13-2	FALSE	16375338	1	0.0142857
chr4	140417095	140527853	ENSG00000145391	SETD7	FALSE	50616423	0.827128	0.0142857
chr21	31768392	31769136	ENSG00000198390	KRTAP13-1	FALSE	16350759	1	0.0214286
chr21	31797583	31798286	ENSG00000240432	KRTAP13-3	FALSE	16321609	1	0.0214286
chr8	10753555	11058875	ENSG00000171044	XKR6	FALSE	10743555	0.866825	0.0714286
chr21	31802572	31803216	ENSG00000186971	KRTAP13-4	FALSE	16316679	1	0.0285714
chr21	31812597	31813070	ENSG00000186970	KRTAP15-1	FALSE	16306825	0.833333	0.0285714
chr4	153539784	153601317	ENSG00000170006	TMEM154	FALSE	37542959	0.812261	0.00714286
chr13	21950263	22033509	ENSG00000180776	ZDHHC20	FALSE	2950263	0.751724	0.0285714
chr21	31852018	31852663	ENSG00000184351	KRTAP19-1	FALSE	16267232	1	0.0142857
chr21	31859362	31859755	ENSG00000186965	KRTAP19-2	FALSE	16260140	1	NA
chr15	41809374	41836467	ENSG00000103932	RPAP1	FALSE	21809374	0.853333	0.0785714
chr20	56964178	57026157	ENSG00000124164	VAPB	FALSE	5989363	0.715328	0.00714286
chr21	31863782	31864275	ENSG00000244025	KRTAP19-3	FALSE	16255620	1	0.00714286
chr21	31869142	31869451	ENSG00000186967	KRTAP19-4	FALSE	16250444	1	NA
chr20	60758085	60778624	ENSG00000101181	MTG2	FALSE	2236896	0.795918	0.0142857
chr21	31873975	31874435	ENSG00000186977	KRTAP19-5	FALSE	16245460	1	NA
chr21	31913854	31914183	ENSG00000186925	KRTAP19-6	FALSE	16205712	1	NA
chr21	31933194	31933633	ENSG00000244362	KRTAP19-7	FALSE	16186262	0.5	NA
chr21	31962424	31962716	ENSG00000206106	KRTAP22-2	FALSE	16157179	1	NA
chr4	153690506	153700916	ENSG00000169989	TIGD4	FALSE	37443360	0.730769	0.0214286
chr21	31964759	31965394	ENSG00000212938	KRTAP6-3	FALSE	16154501	1	0.00714286
chr9	4553386	4666674	ENSG00000106686	SPATA6L	FALSE	4543386	0.808777	0.0214286
chr8	10983980	10987745	ENSG00000215346		FALSE	10973980	0.857143	0.0142857
chr21	31970909	31971219	ENSG00000186930	KRTAP6-2	FALSE	16148676	1	0.0142857
chr4	106962756	107242652	ENSG00000145348	TBCK	FALSE	54302639	0.756522	0.0357143
chr21	31973414	31973612	ENSG00000186924	KRTAP22-1	FALSE	16146283	1	0.00714286
chr21	31985750	31986249	ENSG00000184724	KRTAP6-1	FALSE	16133646	1	0.00714286
chr22	24407642	24574596	ENSG00000099991	CABIN1	FALSE	8407642	0.861502	0.0428571
chr21	31988750	31989003	ENSG00000244624	KRTAP20-1	FALSE	16130892	NA	NA
chr21	31992946	31993169	ENSG00000206105	KRTAP20-4	FALSE	16126726	1	0.00714286
chr20	3208063	3219836	ENSG00000088836	SLC4A11	FALSE	3198063	0.924528	0.0642857
chr21	32007555	32007938	ENSG00000184032	KRTAP20-2	FALSE	16111957	0.8	0.0142857
chr21	32015183	32015455	ENSG00000206104	KRTAP20-3	FALSE	16104440	1	NA
chr21	32090843	32091095	ENSG00000231068	KRTAP21-3	FALSE	16028800	1	0.00714286
chr15	25922420	26110317	ENSG00000206190	ATP10A	FALSE	5922420	0.770833	0.0857143
chr8	11141925	11185646	ENSG00000104643	MTMR9	FALSE	11131925	0.826923	0.00714286
chr21	32119112	32119551	ENSG00000187026	KRTAP21-2	FALSE	16000344	1	NA
chr13	22066836	22178353	ENSG00000165487	MICU2	FALSE	3066836	0.756098	0.0428571
chr21	32127439	32127746	ENSG00000187005	KRTAP21-1	FALSE	15992149	NA	0.00714286
chr21	32185016	32185570	ENSG00000183640	KRTAP8-1	FALSE	15934325	1	0.00714286
chr4	123300121	123350957	ENSG00000164113	ADAD1	FALSE	67793319	0.874433	0.05
chr21	32252966	32253874	ENSG00000182591	KRTAP11-1	FALSE	15866021	0.9	0.0428571
chr21	32410478	32410795	ENSG00000206102	KRTAP19-8	FALSE	15709100	1	NA
chr15	91509270	91538859	ENSG00000198901	PRC1	FALSE	10982533	0.666667	0.00714286
chr4	153701089	153839615	ENSG00000164144	ARFIP1	FALSE	37304661	0.783883	0.0142857
chr4	147560045	147563626	ENSG00000151615	POU4F2	FALSE	43580650	0.891892	0.0285714
chr9	4662298	4665256	ENSG00000205808	PPAPDC2	FALSE	4652298	0.75	NA
chr18	47309869	47340330	ENSG00000167315	ACAA2	FALSE	28848971	0.72093	0.00714286
chr20	57034157	57090187	ENSG00000198768	APCDD1L	FALSE	5925333	0.917197	0.0428571
chr4	144498455	144621828	ENSG00000183090	FREM3	FALSE	46522448	0.891183	0.264286
chr13	22245522	22278637	ENSG00000102678	FGF9	FALSE	3245522	0.86194	0.0428571
chr4	140586922	140661899	ENSG00000085871	MGST2	FALSE	50482377	0.828244	0.00714286
chr9	4679559	4708398	ENSG00000106993	CDC37L1	FALSE	4669559	0.533333	NA
chr22	24577227	24585078	ENSG00000099994	SUSD2	TRUE	8577227	0.840909	0.0571429
chr4	16503164	16900432	ENSG00000169744	LDB2	FALSE	16493164	0.855735	0.0642857
chr18	47322163	47363993	ENSG00000266997		FALSE	28861265	0.816176	0.00714286
chr15	64457716	64648442	ENSG00000169118	CSNK1G1	FALSE	37872950	0.764228	NA
chr21	32490734	32932290	ENSG00000156299	TIAM1	FALSE	15187605	0.831247	0.107143
chr15	51200869	51298097	ENSG00000081014	AP4E1	FALSE	31200869	0.713693	0.0285714
chr13	23755091	23899304	ENSG00000102683	SGCG	FALSE	4755091	0.903513	0.0642857
chr20	60790026	60795323	ENSG00000101180	HRH3	FALSE	2220197	0.911765	0.0428571
chr20	57209828	57210772	ENSG00000268941		FALSE	5804748	1	0.0142857
chr9	128199672	128469513	ENSG00000119487	MAPKAP1	FALSE	12733918	0.787938	0.0214286
chr4	147627790	147867034	ENSG00000137473	TTC29	FALSE	43277242	0.857786	0.0857143
chr4	158125334	158287227	ENSG00000120251	GRIA2	FALSE	32857049	0.840169	0.157143
chr9	4711155	4742043	ENSG00000147853	AK3	FALSE	4701155	0.704545	NA
chr4	140637907	141075338	ENSG00000196782	MAML3	FALSE	50068938	0.804754	0.05
chr8	145698795	145701718	ENSG00000160973	FOXH1	FALSE	652304	0.882353	0.0357143
chr4	144792020	144826716	ENSG00000197465	GYPE	FALSE	46317560	0.880952	NA
chr7	1022835	1029276	ENSG00000073067	CYP2W1	FALSE	1012835	0.966667	0.0428571
chr8	86134675	86157946	ENSG00000258256		FALSE	39295788	0.829545	NA
chr8	86158524	86162077	ENSG00000257962		FALSE	39319637	0.625	0.0142857
chr15	64472547	64665980	ENSG00000259316		FALSE	37855412	0.753316	NA
chr15	26788693	27184686	ENSG00000166206	GABRB3	FALSE	6788693	0.880059	0.0928571
chr15	51348795	51397473	ENSG00000183578	TNFAIP8L3	FALSE	31348795	0.888525	0.0285714
chr18	47349183	47721463	ENSG00000167306	MYO5B	FALSE	28888285	0.880054	0.192857
chr22	24615622	24641110	ENSG00000099998	GGT5	FALSE	8615622	0.928571	0.0285714
chr4	153857504	153900848	ENSG00000137460	FHDC1	FALSE	37243428	0.844262	0.0928571
chr15	64657193	64679886	ENSG00000166803	KIAA0101	FALSE	37841506	0.793103	0.00714286
chr21	33031935	33041244	ENSG00000142168	SOD1	FALSE	15078651	0.428571	0.0142857
chr7	1036622	1177896	ENSG00000146540	C7orf50	FALSE	1026622	0.85941	0.00714286
chr9	4792869	4885917	ENSG00000120158	RCL1	FALSE	4782869	0.763265	NA
chr15	91541646	91565833	ENSG00000184056	VPS33B	FALSE	10955559	0.642857	0.00714286
chr8	145703352	145727504	ENSG00000160972	PPP1R16A	FALSE	626518	0.833333	0.0571429
chr4	141178440	141306880	ENSG00000153130	SCOC	FALSE	49837396	0.849662	0.00714286
chr20	60813580	60871268	ENSG00000130703	OSBPL2	FALSE	2144252	0.834171	0.0142857
chr3	39371197	39375171	ENSG00000179934	CCR8	FALSE	39361197	0.731707	0.0642857
chr13	23902965	24007841	ENSG00000151835	SACS	FALSE	4902965	0.874142	0.185714
chr14	64063757	64108579	ENSG00000140006	WDR89	FALSE	43230961	0.755556	0.00714286
chr7	1084212	1098897	ENSG00000164849	GPR146	FALSE	1074212	0.96	0.0142857
chr4	144917257	145061844	ENSG00000250361	GYPB	FALSE	46082432	0.887565	0.00714286
chr20	57226328	57254582	ENSG00000124222	STX16	FALSE	5760938	0.727273	NA
chr14	64150932	64194757	ENSG00000126821	SGPP1	FALSE	43144783	0.828283	0.00714286
chr3	39424839	39438842	ENSG00000144659	SLC25A38	FALSE	39414839	0.847826	0.0142857
chr4	154073494	154260472	ENSG00000109654	TRIM2	FALSE	36883804	0.750716	0.0285714
chr20	3229951	3388272	ENSG00000088854	C20orf194	FALSE	3219951	0.786241	0.0285714
chr9	4859120	4859260	ENSG00000269305		FALSE	4849120	NA	NA
chr3	10857885	10982419	ENSG00000132164	SLC6A11	FALSE	10847885	0.885756	0.0928571
chr4	159045626	159094470	ENSG00000164125	FAM198B	FALSE	32049806	0.733871	0.0214286
chr18	20714528	20840431	ENSG00000134508	CABLES1	FALSE	2253630	0.763359	0.0214286
chr3	39448180	39454033	ENSG00000168028	RPSA	FALSE	39438180	0.8125	0.00714286
chr21	33043346	33104388	ENSG00000156304	SCAF4	TRUE	15015507	0.733333	0.0357143
chr8	11188397	11189717	ENSG00000177710	SLC35G5	FALSE	11178397	1	0.0285714
chr13	24144509	24250232	ENSG00000127863	TNFRSF19	FALSE	5144509	0.725581	0.00714286
chr4	123372625	123377880	ENSG00000109471	IL2	TRUE	67766396	0.75	0.0142857
chr8	11225911	11296167	ENSG00000184608	C8orf12	FALSE	11215911	0.90287	0.0142857
chr22	24666786	24813708	ENSG00000100014	SPECC1L	FALSE	8666786	0.771987	0.0428571
chr9	128509624	128729656	ENSG00000167081	PBX3	FALSE	12473775	0.751012	0.0357143
chr7	36118694	36125346	ENSG00000205745		FALSE	21928985	0.95122	0.00714286
chr20	44563267	44576662	ENSG00000100982	PCIF1	FALSE	15193698	0.677419	0.0214286
chr8	11278972	11332224	ENSG00000154319	FAM167A	FALSE	11268972	0.893548	0.0285714
chr15	51500254	51630807	ENSG00000137869	CYP19A1	FALSE	31500254	0.863592	0.0642857
chr8	86239837	86291243	ENSG00000133742	CA1	FALSE	39400950	0.846273	0.05
chr7	1121844	1133451	ENSG00000164850	GPER1	FALSE	1111844	0.958333	NA
chr4	148402069	148466106	ENSG00000151617	EDNRA	FALSE	42678170	0.860465	0.0928571
chr9	4985033	5128183	ENSG00000096968	JAK2	TRUE	4975033	0.80315	0.05
chr7	36192758	36341152	ENSG00000122547	EEPD1	FALSE	21713179	0.829508	0.0214286
chr13	24304328	24463558	ENSG00000027001	MIPEP	FALSE	5304328	0.710438	0.0357143
chr22	24666866	24838324	ENSG00000258555	SPECC1L-ADORA2A	FALSE	8666866	0.79902	0.0214286
chr4	154265801	154336270	ENSG00000121211	MND1	FALSE	36808006	0.767857	0.00714286
chr15	64679947	64747502	ENSG00000103671	TRIP4	FALSE	37773890	0.794286	0.00714286
chr4	123533783	123542224	ENSG00000138684	IL21	FALSE	67602052	0.787879	0.00714286
chr7	1191707	1200395	ENSG00000178381	ZFAND2A	FALSE	1181707	0.857143	0.0142857
chr8	11351510	11422113	ENSG00000136573	BLK	FALSE	11341510	0.898039	0.0357143
chr22	24813847	24838328	ENSG00000128271	ADORA2A	FALSE	8813847	0.881188	0.0357143
chr15	41849873	41871536	ENSG00000092445	TYRO3	TRUE	21849873	0.759259	0.0428571
chr4	159122756	159176563	ENSG00000164124	TMEM144	FALSE	31967713	0.8	0.0214286
chr4	141309609	141349122	ENSG00000153132	CLGN	FALSE	49795154	0.813853	0.0785714
chr21	33245628	33416946	ENSG00000142149	HUNK	FALSE	14702949	0.832084	0.0357143
chr13	24322243	24323901	ENSG00000268735		FALSE	5322243	0.75	NA
chr20	44577292	44600833	ENSG00000198026	ZNF335	FALSE	15207723	0.928571	0.00714286
chr4	123653857	123666098	ENSG00000181004	BBS12	FALSE	67478178	0.611111	0.00714286
chr13	24465238	24476794	ENSG00000205863	C1QTNF9B	FALSE	5465238	0.789474	0.0642857
chr17	7788124	7816078	ENSG00000170004	CHD3	TRUE	14446928	0.882353	0.05
chr17	3763609	3798185	ENSG00000004660	CAMKK1	FALSE	18464821	0.827273	0.0142857
chr9	5077163	5084580	ENSG00000268155		FALSE	5067163	0.857143	NA
chr3	11034410	11080933	ENSG00000157103	SLC6A1	FALSE	11024410	0.885117	0.0428571
chr9	5131979	5185668	ENSG00000120210	INSL6	FALSE	5121979	0.880734	0.0142857
chr15	64752941	64978264	ENSG00000180357	ZNF609	FALSE	37543128	0.807273	0.0571429
chr21	33640530	33651380	ENSG00000159055	MIS18A	FALSE	14468515	0.5	0.00714286
chr22	24863206	24924358	ENSG00000100024	UPB1	FALSE	8863206	0.888514	0.0285714
chr9	5231419	5235304	ENSG00000120211	INSL4	FALSE	5221419	0.928571	0.0214286
chr13	24553839	24895169	ENSG00000273167		FALSE	5553839	0.852059	0.0571429
chr4	123747863	123819391	ENSG00000138685	FGF2	FALSE	67324885	0.800781	NA
chr20	60877149	60883918	ENSG00000130706	ADRM1	FALSE	2131602	0.9375	0.00714286
chr8	11534468	11617511	ENSG00000136574	GATA4	FALSE	11524468	0.887473	0.0357143
chr9	129089128	129269320	ENSG00000196814	MVB12B	FALSE	11934111	0.88907	0.0285714
chr15	51633826	51700210	ENSG00000186417	GLDN	FALSE	31633826	0.884532	0.0714286
chr18	47753563	47792892	ENSG00000172361	CCDC11	FALSE	29292665	0.848297	0.0428571
chr4	17461884	17513857	ENSG00000151552	QDPR	FALSE	17451884	0.741071	0.00714286
chr9	5299868	5304969	ENSG00000107014	RLN2	FALSE	5289868	1	0.0214286
chr20	57226490	57290466	ENSG00000254995	STX16-NPEPL1	FALSE	5725054	0.822581	NA
chr21	33664124	33687095	ENSG00000170262	MRAP	FALSE	14432800	0.709091	0.0214286
chr9	5334969	5339873	ENSG00000107018	RLN1	FALSE	5324969	0.636364	0.0214286
chr7	1272543	1276954	ENSG00000164853	UNCX	TRUE	1262543	0.952381	0.0142857
chr18	20777108	21017925	ENSG00000134490	TMEM241	FALSE	2316210	0.837307	0.0285714
chr22	16256441	16287937	ENSG00000198062	POTEH	FALSE	256441	0.848101	0.0571429
chr12	27915671	27924209	ENSG00000205693	MANSC4	FALSE	6932485	0.875	NA
chr9	5357973	5437878	ENSG00000107020	PLGRKT	FALSE	5347973	0.735955	NA
chr8	145728356	145732557	ENSG00000167701	GPT	FALSE	621465	0.846154	0.0214286
chr22	24936406	24951903	ENSG00000138867	GUCD1	FALSE	8936406	0.875	0.00714286
chr7	99214569	99230030	ENSG00000197037	ZSCAN25	FALSE	38160238	0.829268	0.0142857
chr4	148538534	148593195	ENSG00000164168	TMEM184C	FALSE	42551081	0.74359	NA
chr20	57264187	57294294	ENSG00000215440	NPEPL1	FALSE	5721226	0.861111	0.0214286
chr21	33683329	33765335	ENSG00000142207	URB1	FALSE	14354560	0.802956	0.114286
chr4	154387498	154557863	ENSG00000121210	KIAA0922	FALSE	36586413	0.787013	0.05
chr13	24553944	24881212	ENSG00000182957	SPATA13	FALSE	5553944	0.852897	0.0785714
chr4	141363416	141419531	ENSG00000205301		FALSE	49724745	0.876963	0.0714286
chr17	32646055	32648421	ENSG00000108700	CCL8	FALSE	7383049	0.857143	0.0142857
chr9	5450503	5470566	ENSG00000120217	CD274	TRUE	5440503	0.9	0.0142857
chr20	3451687	3631769	ENSG00000088812	ATRN	FALSE	3441687	0.776316	0.0285714
chr14	106383838	106391825	ENSG00000226777	KIAA0125	FALSE	947715	0.837662	0.0357143
chr7	1468101	1499138	ENSG00000164877	MICALL2	FALSE	1458101	0.84058	0.0285714
chr9	129376722	129463311	ENSG00000136944	LMX1B	FALSE	11740120	0.912234	0.0142857
chr8	11618896	11620309	ENSG00000255394	C8orf49	FALSE	11608896	1	0.00714286
chr2	27498289	27504367	ENSG00000163793	DNAJC5G	FALSE	27488289	0.837838	0.00714286
chr3	155588325	155661815	ENSG00000163655	GMPS	TRUE	42350615	0.784615	0.0357143
chr4	123809852	123844123	ENSG00000170917	NUDT6	FALSE	67300153	0.827586	0.0142857
chr22	16448824	16449805	ENSG00000130538	OR11H1	FALSE	448824	0.857143	0.0214286
chr12	57057127	57082159	ENSG00000110958	PTGES3	FALSE	19200433	0.65	NA
chr8	38243725	38267045	ENSG00000165046	LETM2	FALSE	5571842	0.75	NA
chr22	17071667	17073700	ENSG00000198445	CCT8L2	FALSE	1071667	0.928571	0.0642857
chr7	139784546	139876835	ENSG00000006459	KDM7A	FALSE	19251828	0.808955	0.0714286
chr22	24951471	25005947	ENSG00000100028	SNRPD3	FALSE	8951471	0.878261	0.00714286
chr9	5510545	5571282	ENSG00000197646	PDCD1LG2	TRUE	5500545	0.827381	0.0142857
chr22	17264302	17302589	ENSG00000172967	XKR3	FALSE	1264302	0.914489	0.05
chr3	134196548	134205558	ENSG00000129055	ANAPC13	FALSE	40691694	0.916667	NA
chr8	11627148	11644855	ENSG00000154328	NEIL2	FALSE	11617148	0.84375	0.0142857
chr15	91643180	91844539	ENSG00000185518	SV2B	FALSE	10676853	0.899132	0.0714286
chr14	76776957	76968178	ENSG00000119715	ESRRB	FALSE	30371362	0.876206	0.0428571
chr12	69864129	69973562	ENSG00000166225	FRS2	FALSE	32007435	0.684211	NA
chr21	33765439	33766254	ENSG00000256073	C21orf119	FALSE	14353641	1	NA
chr9	129567285	129600489	ENSG00000169155	ZBTB43	FALSE	11602942	0.644068	0.00714286
chr13	24881304	24896673	ENSG00000240654	C1QTNF9	FALSE	5881304	0.844444	0.0285714
chr14	95648277	95786243	ENSG00000165959	CLMN	FALSE	11553297	0.869023	0.1
chr10	27687116	27703297	ENSG00000182077	PTCHD3	FALSE	11551638	0.831461	0.107143
chr12	75728419	75764340	ENSG00000173401	GLIPR1L1	FALSE	37871725	0.8	NA
chr4	72897521	73013784	ENSG00000056291	NPFFR2	TRUE	20237404	0.840759	0.0642857
chr7	142723245	142724282	ENSG00000179468	OR9A2	FALSE	16404381	0.888889	0.0857143
chr22	17442826	17489112	ENSG00000215568	GAB4	FALSE	1442826	0.874608	0.05
chr14	31091318	31205018	ENSG00000092108	SCFD1	FALSE	12091318	0.761134	0.0214286
chr13	24895264	24895566	ENSG00000205850		FALSE	5895264	1	0.00714286
chr3	180319918	180335616	ENSG00000163728	TTC14	FALSE	17676814	0.785714	0.0214286
chr7	142749417	142750444	ENSG00000225781	OR6V1	FALSE	16378219	0.941176	0.0714286
chr12	27932953	27955973	ENSG00000087448	KLHL42	FALSE	6900721	0.796296	0.0214286
chr7	142829170	142836839	ENSG00000159763	PIP	FALSE	16291824	0.877193	0.0142857
chr4	141445312	141474924	ENSG00000179387	ELMOD2	FALSE	49669352	0.77027	0.0142857
chr17	43331760	43339479	ENSG00000184361	SPATA32	FALSE	18068754	0.962963	0.0142857
chr9	129622944	129648157	ENSG00000177125	ZBTB34	FALSE	11555274	0.8	0.0285714
chr17	32683471	32685629	ENSG00000181374	CCL13	FALSE	7420465	0.875	0.00714286
chr21	33784314	33887707	ENSG00000166979	EVA1C	FALSE	14232188	0.779661	0.00714286
chr4	148558936	148605381	ENSG00000164169	PRMT10	FALSE	42538895	0.830986	0.0285714
chr3	130732719	130746493	ENSG00000034533	ASTE1	FALSE	37227865	0.666667	0.0142857
chr15	27111510	27194354	ENSG00000186297	GABRA5	FALSE	7111510	0.842333	0.0642857
chr13	24995064	25086948	ENSG00000102699	PARP4	TRUE	5995064	0.798354	0.15
chr8	86285665	86361269	ENSG00000164879	CA3	FALSE	39446778	0.87897	0.05
chr3	11178779	11305243	ENSG00000196639	HRH1	FALSE	11168779	0.895522	0.0714286
chr15	92396925	92715665	ENSG00000176463	SLCO3A1	FALSE	9805727	0.843616	0.0285714
chr3	62304648	62321888	ENSG00000114405	C3orf14	FALSE	28182966	0.77551	0.0142857
chr17	60349848	60360276	ENSG00000270033		FALSE	35086842	0.9	0.0142857
chr4	145030457	145061904	ENSG00000170180	GYPA	FALSE	46082372	0.879699	0.0428571
chr4	123844229	124240605	ENSG00000145375	SPATA5	FALSE	66903671	0.736954	0.0214286
chr20	60883011	60942368	ENSG00000130702	LAMA5	FALSE	2073152	0.887273	0.178571
chr7	142880512	142881528	ENSG00000236398	TAS2R39	FALSE	16247135	0.947368	0.0714286
chr7	150019728	150035239	ENSG00000127399	LRRC61	FALSE	9093424	0.882353	0.0214286
chr4	17516788	17528727	ENSG00000249581	CLRN2	FALSE	17506788	0.815385	0.0357143
chr6	24667263	24705293	ENSG00000112304	ACOT13	FALSE	24657263	0.771084	NA
chr15	51739908	51915030	ENSG00000104093	DMXL2	FALSE	31739908	0.76525	0.107143
chr17	46970127	46973233	ENSG00000159199	ATP5G1	FALSE	21707121	0.4	0.00714286
chr17	60447579	60493837	ENSG00000172421	EFCAB3	FALSE	35184573	0.863128	0.0428571
chr10	48413092	48416853	ENSG00000128802	GDF2	FALSE	6158157	0.880952	0.0714286
chr3	160394948	160396233	ENSG00000179674	ARL14	FALSE	37616197	1	0.0214286
chr12	49932940	49952091	ENSG00000135519	KCNH3	FALSE	12076246	0.923077	0.0571429
chr15	64979772	64995480	ENSG00000180304	OAZ2	FALSE	37525912	0.764706	0.0142857
chr8	86376081	86393722	ENSG00000104267	CA2	FALSE	39537194	0.810345	0.0571429
chr10	48425815	48438976	ENSG00000107623	GDF10	FALSE	6170880	0.918519	0.0642857
chr6	18155560	18224084	ENSG00000165097	KDM1B	FALSE	18145560	0.775281	0.05
chr10	27793197	27831143	ENSG00000099246	RAB18	FALSE	11423792	0.644068	NA
chr12	65672423	65882024	ENSG00000174099	MSRB3	FALSE	27815729	0.848603	0.0142857
chr3	160473390	160796695	ENSG00000163590	PPM1L	FALSE	37215735	0.822716	0.0214286
chr10	93683526	93790082	ENSG00000095564	BTAF1	FALSE	41734665	0.797468	0.0285714
chr12	28111017	28125638	ENSG00000087494	PTHLH	FALSE	6731056	0.75	0.0357143
chr9	5629025	5776557	ENSG00000107036	KIAA1432	FALSE	5619025	0.75102	0.0214286
chr7	150026938	150029808	ENSG00000188707	ZBED6CL	FALSE	9098855	0.857143	0.0214286
chr2	113825547	113833427	ENSG00000136697	IL1F10	FALSE	18499376	0.920354	0.0428571
chr3	138663066	138665982	ENSG00000183770	FOXL2	TRUE	45158212	0.888889	NA
chr10	7200586	7453450	ENSG00000198879	SFMBT2	TRUE	7190586	0.797531	0.0357143
chr4	17578815	17609595	ENSG00000002549	LAP3	FALSE	17568815	0.787879	0.0214286
chr12	125478246	125515777	ENSG00000184992	BRI3BP	FALSE	8326118	0.815217	0.0214286
chr6	49913814	49917157	ENSG00000214643	DEFB133	FALSE	8913009	0.926471	0.0142857
chr7	150035408	150038763	ENSG00000106538	RARRES2	FALSE	9089900	0.964286	0.0214286
chr22	17565844	17596583	ENSG00000177663	IL17RA	FALSE	1565844	0.84	0.0357143
chr21	33948862	33959683	ENSG00000242220	TCP10L	FALSE	14160212	0.90566	0.0357143
chr17	48187404	48207246	ENSG00000167100	SAMD14	FALSE	22924398	0.925926	0.05
chr5	140868808	140892546	ENSG00000240764	PCDHGC5	FALSE	40012714	0.895833	0.0357143
chr2	224839829	224904036	ENSG00000135919	SERPINE2	FALSE	18285337	0.773585	NA
chr6	49927962	49931818	ENSG00000177684	DEFB114	FALSE	8898348	0.818182	0.0357143
chr10	90581889	90611575	ENSG00000152766	ANKRD22	FALSE	44913172	0.888889	0.0285714
chr3	134204585	134293859	ENSG00000182923	CEP63	FALSE	40699731	0.743902	0.0285714
chr2	95813075	95831158	ENSG00000144026	ZNF514	FALSE	486904	0.75	0.0214286
chr4	73146686	73434516	ENSG00000156140	ADAMTS3	FALSE	20486569	0.778438	0.0571429
chr4	159236463	159574524	ENSG00000171509	RXFP1	FALSE	31569752	0.895006	0.0714286
chr15	65032091	65067786	ENSG00000166831	RBPMS2	FALSE	37453606	0.878378	0.0142857
chr10	102756375	102767593	ENSG00000107816	LZTS2	FALSE	32757154	0.8	0.0142857
chr5	110073837	110100857	ENSG00000164209	SLC25A46	FALSE	60668196	0.75	0.00714286
chr9	129677053	129985445	ENSG00000136828	RALGPS1	FALSE	11217986	0.835125	0.0142857
chr20	44637547	44645200	ENSG00000100985	MMP9	FALSE	15267978	0.777778	0.0214286
chr3	62355356	62359999	ENSG00000153266	FEZF2	FALSE	28144855	0.8	0.00714286
chr17	19581601	19622292	ENSG00000180638	SLC47A2	FALSE	2640714	0.79845	0.0571429
chr2	171571861	171574588	ENSG00000204335	SP5	FALSE	71614785	0.909091	0.0142857
chr4	141480588	141489959	ENSG00000109424	UCP1	FALSE	49654317	0.810811	0.00714286
chr17	48211104	48227991	ENSG00000108819	PPP1R9B	FALSE	22948098	0.906977	0.0214286
chr2	28974506	29025806	ENSG00000213639	PPP1CB	FALSE	28964506	0.604651	0.00714286
chr21	33951132	33984591	ENSG00000265590		FALSE	14135304	0.823529	0.0142857
chr3	138666076	138672293	ENSG00000206262	C3orf72	FALSE	45161222	0.888889	NA
chr2	171640296	171655481	ENSG00000204334	ERICH2	FALSE	71533892	0.78481	0.0142857
chr8	145734457	145736596	ENSG00000167700	MFSD3	FALSE	617426	1	NA
chr6	34725183	34741571	ENSG00000124562	SNRPC	FALSE	24088595	0.868421	0.00714286
chr22	24979718	25024972	ENSG00000100031	GGT1	FALSE	8979718	0.891667	0.00714286
chr3	138722804	138725110	ENSG00000206260	PRR23A	FALSE	45217950	0.914894	0.0642857
chr12	113344582	113369990	ENSG00000089127	OAS1	FALSE	20471905	0.921986	0.0214286
chr8	11653082	11696818	ENSG00000079459	FDFT1	FALSE	11643082	0.6875	0.0214286
chr3	11313995	11599139	ENSG00000197548	ATG7	TRUE	11303995	0.809458	0.0214286
chr6	135238528	135271260	ENSG00000118514	ALDH8A1	FALSE	35833807	0.839695	0.05
chr17	8706041	8770994	ENSG00000174083	PIK3R6	FALSE	13492012	0.875	0.0785714
chr17	67240452	67323385	ENSG00000154265	ABCA5	FALSE	41977446	0.710059	0.0285714
chr6	43193367	43197222	ENSG00000112667	DNPH1	FALSE	15632944	0.833333	0.00714286
chr10	23216953	23326518	ENSG00000165309	ARMC3	FALSE	15928417	0.848193	0.05
chr6	31633879	31641323	ENSG00000263020		FALSE	27188843	0.842105	0.0285714
chr2	201675317	201688569	ENSG00000082153	BZW1	FALSE	41500804	0.678571	0.0142857
chr17	72690452	72709117	ENSG00000186074	CD300LF	FALSE	47427446	0.885714	0.0357143
chr21	33964389	33985176	ENSG00000159079	C21orf59	FALSE	14134719	0.770492	NA
chr17	32687347	32690250	ENSG00000108702	CCL1	FALSE	7424341	0.916667	NA
chr15	27216429	27778373	ENSG00000182256	GABRG3	FALSE	7216429	0.865241	0.0357143
chr19	7694682	7707934	ENSG00000268400		FALSE	7684682	0.892857	NA
chr22	17597189	17602257	ENSG00000183307	CECR6	FALSE	1597189	0.928571	0.00714286
chr10	90639491	90734910	ENSG00000138134	STAMBPL1	FALSE	44789837	0.792079	0.0285714
chr16	64043	69452	ENSG00000234769	WASH4P	FALSE	54043	1	0.0142857
chr6	31637944	31641553	ENSG00000240053	LY6G5B	FALSE	27188613	0.9	0.0285714
chr8	141667999	142012315	ENSG00000169398	PTK2	FALSE	4341707	0.757125	0.0285714
chr15	65107831	65117867	ENSG00000140451	PIF1	FALSE	37403525	0.90625	0.0428571
chr22	17602476	17612994	ENSG00000235478		FALSE	1602476	0.880952	0.00714286
chr4	154622652	154626851	ENSG00000137462	TLR2	FALSE	36517425	0.7	0.0428571
chr11	65358665	65359947	ENSG00000269018		FALSE	10714460	1	0.00714286
chr3	160801671	160823172	ENSG00000169255	B3GALNT1	FALSE	37189258	0.757895	0.0285714
chr6	36210980	36276372	ENSG00000180316	PNPLA1	FALSE	22553794	0.897727	0.0285714
chr7	107663993	107770801	ENSG00000091128	LAMB4	FALSE	46609662	0.8663	0.1
chr17	32901142	32906388	ENSG00000197322	C17orf102	FALSE	7638136	0.913043	0.00714286
chr3	138724648	139076065	ENSG00000175110	MRPS22	FALSE	45219794	0.891723	0.0285714
chr6	146348782	146758734	ENSG00000152822	GRM1	FALSE	24346333	0.814286	0.0928571
chr5	133541305	133706738	ENSG00000006837	CDKL3	FALSE	47198522	0.84007	0.0357143
chr7	99245817	99277621	ENSG00000106258	CYP3A5	FALSE	38191486	0.90625	0.05
chr4	148653214	148993931	ENSG00000071205	ARHGAP10	FALSE	42150345	0.797657	0.0357143
chr11	104813593	104840163	ENSG00000196954	CASP4	FALSE	30156353	0.64	0.0214286
chr11	8968841	8986558	ENSG00000175348	TMEM9B	FALSE	8958841	0.75	0.0214286
chr19	18390563	18392432	ENSG00000130522	JUND	FALSE	6289350	0.666667	NA
chr17	37356536	37360980	ENSG00000108298	RPL19	FALSE	12093530	0.846154	0.00714286
chr11	65360326	65363467	ENSG00000173338	KCNK7	FALSE	10716121	1	0.00714286
chr17	32907768	32966337	ENSG00000181291	TMEM132E	FALSE	7644762	0.910941	0.0357143
chr19	41307202	41404187	ENSG00000268797		FALSE	13625420	0.823718	NA
chr11	57508825	57510986	ENSG00000211450	C11orf31	FALSE	2864620	0.75	NA
chr12	54673977	54680872	ENSG00000135486	HNRNPA1	FALSE	16817283	0.666667	0.00714286
chr6	137464968	137494785	ENSG00000164485	IL22RA2	FALSE	33610282	0.818898	0.00714286
chr4	154631277	154681387	ENSG00000145428	RNF175	FALSE	36462889	0.823529	0.0357143
chr13	25254549	25285921	ENSG00000075673	ATP12A	FALSE	6254549	0.86	0.0785714
chr3	171318195	171528740	ENSG00000075651	PLD1	FALSE	26483690	0.764	0.0571429
chr2	175260458	175294303	ENSG00000144306	SCRN3	FALSE	67895070	0.72093	0.0142857
chr2	119599747	119605254	ENSG00000163064	EN1	FALSE	24273576	0.828571	0.00714286
chr19	18417040	18434084	ENSG00000130520	LSM4	FALSE	6247698	0.846154	0.0142857
chr19	41349443	41356352	ENSG00000255974	CYP2A6	FALSE	13667661	0.807692	NA
chr17	79091095	79139877	ENSG00000181409	AATK	FALSE	53828089	0.847134	0.0285714
chr19	40325098	40337054	ENSG00000105202	FBL	FALSE	12643316	0.88	0.00714286
chr11	2949503	2950685	ENSG00000181649	PHLDA2	FALSE	2939503	1	NA
chr11	62931248	62997124	ENSG00000196600	SLC22A25	FALSE	8287043	0.896552	0.0785714
chr16	28857921	28885526	ENSG00000178188	SH2B1	FALSE	6450275	0.690909	0.0357143
chr12	125549925	125627873	ENSG00000081760	AACS	FALSE	8214022	0.855172	0.0285714
chr6	150070579	150132556	ENSG00000120265	PCMT1	FALSE	20972511	0.618421	NA
chr1	45959538	45965751	ENSG00000236624	CCDC163P	FALSE	45949538	1	NA
chr6	99845927	99873207	ENSG00000132424	PNISR	FALSE	38015761	0.785714	0.0285714
chr12	117645947	117889975	ENSG00000089250	NOS1	FALSE	15951920	0.899063	0.264286
chr4	141541919	141677274	ENSG00000109436	TBC1D9	FALSE	49467002	0.835979	0.1
chr16	96407	103628	ENSG00000161980	POLR3K	FALSE	86407	0.708333	NA
chr19	55361898	55378662	ENSG00000240403	KIR3DL2	FALSE	3740321	0.865385	0.0214286
chr15	92937058	93011958	ENSG00000140557	ST8SIA2	FALSE	9509434	0.930421	0.05
chr1	44457031	44462200	ENSG00000159214	CCDC24	FALSE	44447031	0.884615	0.0214286
chr5	125695824	125832186	ENSG00000155324	GRAMD3	FALSE	55073074	0.814815	0.0428571
chr6	26383324	26395102	ENSG00000124508	BTN2A2	FALSE	26373324	0.85	0.0142857
chr9	5765076	5833117	ENSG00000099219	ERMP1	FALSE	5755076	0.753846	0.0214286
chr7	142919130	142920162	ENSG00000221937	TAS2R40	FALSE	16208501	0.875	0.0285714
chr1	148555979	148596267	ENSG00000243452	NBPF15	FALSE	24020545	0.853659	NA
chr16	103010	107669	ENSG00000161981	SNRNP25	FALSE	93010	0.916667	NA
chr17	45726842	45762871	ENSG00000108424	KPNB1	FALSE	20463836	0.794521	0.0214286
chr1	43232940	43263968	ENSG00000164008	C1orf50	FALSE	43222940	0.918367	0.05
chr19	46498339	46524576	ENSG00000104983	CCDC61	FALSE	12594407	0.890244	0.0357143
chr6	24705089	24721064	ENSG00000112308	C6orf62	FALSE	24695089	0.625	0.00714286
chr11	65365226	65382853	ENSG00000173327	MAP3K11	FALSE	10721021	0.852941	0.0357143
chr7	142919163	142919360	ENSG00000268170		FALSE	16209303	NA	NA
chr10	124608594	124639157	ENSG00000213185	FAM24B	FALSE	10885590	0.886598	NA
chr11	1151580	1222364	ENSG00000215182	MUC5AC	FALSE	1141580	0.951049	0.0428571
chr19	18451397	18480760	ENSG00000130517	PGPEP1	FALSE	6201022	0.870588	0.0142857
chr2	44395108	44471523	ENSG00000138032	PPM1B	FALSE	44385108	0.666667	NA
chr1	202995626	203047868	ENSG00000143847	PPFIA4	FALSE	46192753	0.873096	0.0428571
chr2	70523107	70529222	ENSG00000035141	FAM136A	FALSE	21796949	0.75	NA
chr1	40505905	40538321	ENSG00000131236	CAP1	FALSE	40495905	0.672131	0.0142857
chr15	28000021	28344504	ENSG00000104044	OCA2	FALSE	8000021	0.815501	0.0214286
chr8	86568695	86575726	ENSG00000205176	REXO1L1P	FALSE	39729808	0.789474	0.00714286
chr3	155755490	156256545	ENSG00000169282	KCNAB1	FALSE	41755885	0.874561	0.0428571
chr2	171669723	171717661	ENSG00000128683	GAD1	FALSE	71471712	0.862745	0.0428571
chr8	86747543	86749570	ENSG00000223524	REXO1L11P	FALSE	39908656	NA	NA
chr8	86756718	86758745	ENSG00000255940	REXO1L10P	FALSE	39917831	NA	NA
chr11	104864962	104893895	ENSG00000137757	CASP5	FALSE	30102621	0.879699	0.0285714
chr7	142941186	142967947	ENSG00000197448	GSTK1	FALSE	16160716	0.830769	NA
chr8	86999552	87166457	ENSG00000147614	ATP6V0D2	FALSE	40160665	0.833564	0.0428571
chr6	39297766	39693181	ENSG00000164627	KIF6	FALSE	19136985	0.843499	0.0857143
chr10	87359312	88126250	ENSG00000182771	GRID1	FALSE	45104377	0.877137	0.0857143
chr22	17618401	17646177	ENSG00000069998	CECR5	FALSE	1618401	0.794118	0.0142857
chr19	18485541	18499986	ENSG00000130513	GDF15	FALSE	6181796	0.757576	0.0142857
chr7	150065278	150071133	ENSG00000214022	REPIN1	FALSE	9057530	0.705882	0.0285714
chr5	96149731	96271513	ENSG00000247121		FALSE	46744090	0.828889	0.00714286
chr20	3639939	3644046	ENSG00000125861	GFRA4	FALSE	3629939	0.885714	0.0285714
chr11	9002123	9025596	ENSG00000175352	NRIP3	FALSE	8992123	0.87037	0.0142857
chr1	45965725	45976739	ENSG00000132763	MMACHC	FALSE	45955725	0.818182	NA
chr18	47793252	47808144	ENSG00000141644	MBD1	FALSE	29332354	0.694444	0.0142857
chr6	49936390	49937338	ENSG00000214642	DEFB113	FALSE	8892828	0.809524	0.0357143
chr20	44650356	44688784	ENSG00000124140	SLC12A5	FALSE	15280787	0.878571	0.0785714
chr10	124670217	124672627	ENSG00000203795	FAM24A	FALSE	10852120	0.84	NA
chr10	121334199	121356541	ENSG00000151923	TIAL1	FALSE	14168206	0.685714	NA
chr4	154701744	154710272	ENSG00000145423	SFRP2	FALSE	36434004	0.866667	0.0357143
chr6	155153831	155578857	ENSG00000146426	TIAM2	FALSE	15526210	0.836988	0.0928571
chr6	49976851	49989694	ENSG00000203970	DEFB110	FALSE	8840472	0.852814	0.0214286
chr15	51973550	52013223	ENSG00000104112	SCG3	FALSE	31973550	0.880866	0.05
chr4	145567173	145666423	ENSG00000164161	HHIP	FALSE	45477853	0.856009	0.128571
chr2	29005383	29073477	ENSG00000163806	SPDYA	FALSE	28995383	0.734848	0.0142857
chr16	108058	126354	ENSG00000007384	RHBDF1	FALSE	98058	0.92	0.0214286
chr9	129849611	129885162	ENSG00000136859	ANGPTL2	FALSE	11318269	0.818182	0.0214286
chr6	36283534	36304662	ENSG00000189325	C6orf222	FALSE	22525504	0.848837	0.05
chr5	140894583	140998622	ENSG00000131504	DIAPH1	FALSE	39906638	0.696335	0.0571429
chr19	18501954	18508427	ENSG00000175489	LRRC25	FALSE	6173355	0.962963	0.0142857
chr3	39508689	39570970	ENSG00000168314	MOBP	FALSE	39498689	0.856742	0.0357143
chr8	87060602	87100850	ENSG00000147613	PSKH2	TRUE	40221715	0.823171	0.0571429
chr11	63137261	63177766	ENSG00000149742	SLC22A9	FALSE	8493056	0.896104	0.1
chr2	102313312	102511149	ENSG00000071054	MAP4K4	FALSE	6987141	0.720867	0.05
chr19	46522411	46526323	ENSG00000008438	PGLYRP1	FALSE	12592660	0.833333	0.0214286
chr17	46985731	47006418	ENSG00000159202	UBE2Z	FALSE	21722725	0.761905	NA
chr1	45976708	45988719	ENSG00000117450	PRDX1	FALSE	45966708	0.705882	0.00714286
chr7	139993493	140104233	ENSG00000157800	SLC37A3	FALSE	19024430	0.788804	NA
chr6	50011288	50016364	ENSG00000180872	DEFB112	FALSE	8813802	0.864198	0.0214286
chr8	145736667	145743229	ENSG00000160957	RECQL4	TRUE	610793	0.833333	0.0142857
chr11	532242	537287	ENSG00000174775	HRAS	TRUE	522242	0.777778	0.0142857
chr5	68389473	68426896	ENSG00000145740	SLC30A5	FALSE	18983832	0.719298	0.00714286
chr22	24981588	24989175	ENSG00000178026	FAM211B	FALSE	8981588	0.928571	0.00714286
chr6	137518621	137540586	ENSG00000027697	IFNGR1	TRUE	33564481	0.821429	0.0214286
chr11	2965667	3013607	ENSG00000205531	NAP1L4	FALSE	2955667	0.764045	0.0214286
chr2	225243415	225266802	ENSG00000124019	FAM124B	FALSE	17922571	0.879433	0.0285714
chr6	50681541	50740701	ENSG00000008197	TFAP2D	FALSE	8089465	0.860307	0.0642857
chr19	46543006	46580376	ENSG00000204869	IGFL4	FALSE	12538607	0.849624	NA
chr11	65383244	65404910	ENSG00000197136	PCNXL3	FALSE	10739039	0.914286	0.0928571
chr12	69979114	69995350	ENSG00000166226	CCT2	FALSE	32122420	0.727273	NA
chr1	43272723	43282954	ENSG00000177868	CCDC23	FALSE	43262723	0.73913	NA
chr19	7696497	7698634	ENSG00000174788	PCP2	FALSE	7686497	1	NA
chr2	113864791	113891593	ENSG00000136689	IL1RN	FALSE	18538620	0.914089	0.0142857
chr16	67691415	67694713	ENSG00000102977	ACD	FALSE	22650040	1	0.05
chr19	46623328	46627931	ENSG00000188624	IGFL3	FALSE	12491052	0.76	0.0214286
chr2	67624451	67637677	ENSG00000143971	ETAA1	FALSE	24688494	0.565217	0.0285714
chr17	43471275	43511787	ENSG00000159314	ARHGAP27	FALSE	18208269	0.823129	0.0357143
chr19	41381344	41388657	ENSG00000198077	CYP2A7	FALSE	13699562	0.894737	0.0214286
chr20	3648612	3662893	ENSG00000149451	ADAM33	FALSE	3638612	0.869565	0.0357143
chr4	155153399	155412930	ENSG00000197410	DCHS2	FALSE	35731346	0.845371	0.2
chr11	57509635	57560715	ENSG00000254732		FALSE	2865430	0.797872	NA
chr14	64319683	64693165	ENSG00000054654	SYNE2	FALSE	42646375	0.751067	0.157143
chr14	77228532	77249354	ENSG00000071246	VASH1	FALSE	30090186	0.90411	0.00714286
chr2	119699742	119752236	ENSG00000019169	MARCO	FALSE	24373571	0.905458	0.164286
chr10	48736874	48827966	ENSG00000183675	PTPN20B	FALSE	6481939	0.891892	0.0142857
chr21	34001069	34100359	ENSG00000159082	SYNJ1	FALSE	14019536	0.786561	0.0857143
chr11	57510986	57519253	ENSG00000233436	BTBD18	FALSE	2866781	0.909091	0.0142857
chr5	96211643	96255420	ENSG00000164308	ERAP2	FALSE	46806002	0.813084	0.0642857
chr6	146864829	146876101	ENSG00000118508	RAB32	FALSE	24228966	0.428571	NA
chr4	73921797	73935472	ENSG00000163626	COX18	FALSE	21261680	0.92	NA
chr14	19377522	19378606	ENSG00000257115	OR11H12	FALSE	377522	1	0.0214286
chr16	30389755	30393863	ENSG00000270466		FALSE	4941938	1	0.0214286
chr4	141780961	142134031	ENSG00000170153	RNF150	FALSE	49010245	0.82097	0.05
chr22	25115001	25170687	ENSG00000184571	PIWIL3	FALSE	9115001	0.853333	0.0357143
chr14	47311134	48143999	ENSG00000272781		FALSE	28311134	0.726838	0.0428571
chr12	57106212	57125412	ENSG00000196531	NACA	TRUE	19249518	0.882353	0.0857143
chr11	64494383	64512928	ENSG00000068831	RASGRP2	FALSE	9850178	0.891892	0.0214286
chr1	179833916	179834311	ENSG00000258664		FALSE	55298482	NA	NA
chr1	44457172	44497139	ENSG00000196517	SLC6A9	FALSE	44447172	0.875	0.0142857
chr17	12626199	12661542	ENSG00000273452		FALSE	9601464	0.901099	0.128571
chr1	43282795	43310660	ENSG00000164010	ERMAP	FALSE	43272795	0.815217	0.0428571
chr14	19553365	19590078	ENSG00000222036	POTEG	FALSE	553365	0.865546	0.0785714
chr20	60962172	60963576	ENSG00000171858	RPS21	FALSE	2051944	1	0.00714286
chr19	7701767	7712759	ENSG00000076944	STXBP2	FALSE	7691767	0.890625	0.05
chr11	9041071	9159661	ENSG00000175356	SCUBE2	FALSE	9031071	0.810811	0.0357143
chr15	52015208	52043782	ENSG00000140280	LYSMD2	FALSE	32015208	0.791667	NA
chr17	48241575	48253292	ENSG00000108823	SGCA	FALSE	22978569	0.904762	0.0285714
chr2	68268262	68338080	ENSG00000197223	C1D	FALSE	23988091	0.827893	NA
chr17	37366789	37382125	ENSG00000141750	STAC2	FALSE	12103783	0.921053	0.0285714
chr7	36363830	36429734	ENSG00000164542	KIAA0895	FALSE	21624597	0.804598	0.0428571
chr18	21032787	21066567	ENSG00000101782	RIOK3	FALSE	2571889	0.71875	0.0214286
chr5	154237113	154256353	ENSG00000155508	CNOT8	FALSE	26648907	0.875	0.0214286
chr6	18224099	18265054	ENSG00000124795	DEK	TRUE	18214099	0.711111	0.0285714
chr12	49950327	49961936	ENSG00000187778	MCRS1	FALSE	12093633	0.883721	0.0142857
chr1	148739443	148758311	ENSG00000203827	NBPF16	FALSE	24204009	0.5	NA
chr17	73163408	73179078	ENSG00000188612	SUMO2	FALSE	47900402	0.848485	0.00714286
chr6	44214824	44221620	ENSG00000096384	HSP90AB1	TRUE	14608546	0.625	0.0285714
chr11	63228876	63258666	ENSG00000168004	HRASLS5	FALSE	8584671	0.834746	0.0428571
chr1	203052260	203055164	ENSG00000122180	MYOG	FALSE	46185457	0.909091	0.00714286
chr13	25338290	25454059	ENSG00000132972	RNF17	FALSE	6338290	0.84127	0.114286
chr1	46016215	46035721	ENSG00000117448	AKR1A1	FALSE	46006215	0.80303	0.0214286
chr2	27505260	27530307	ENSG00000138100	TRIM54	FALSE	27495260	0.874126	0.0428571
chr2	70674412	70781325	ENSG00000163235	TGFA	FALSE	21544846	0.897507	0.0214286
chr17	26125832	26220391	ENSG00000266202		FALSE	862826	0.903465	0.0142857
chr9	129986544	130155939	ENSG00000136895	GARNL3	FALSE	11047492	0.832817	0.00714286
chr9	5881596	6007901	ENSG00000183354	KIAA2026	FALSE	5871596	0.668675	0.0214286
chr10	129347613	129350935	ENSG00000214285	NPS	FALSE	6173812	0.891892	0.0214286
chr6	33172419	33174608	ENSG00000204228	HSD17B8	FALSE	25655558	1	NA
chr16	127006	135852	ENSG00000103152	MPG	FALSE	117006	0.923077	0.00714286
chr6	43211418	43255997	ENSG00000146216	TTBK1	FALSE	15574169	0.893471	0.15
chr11	537527	554916	ENSG00000161328	LRRC56	FALSE	527527	0.924528	0.00714286
chr10	129535499	129539450	ENSG00000186766	FOXI2	FALSE	5985297	0.935484	0.0142857
chr8	87226281	87333375	ENSG00000164893	SLC7A13	FALSE	40387394	0.883638	0.128571
chr1	203059782	203136533	ENSG00000163485	ADORA1	FALSE	46104088	0.868534	0.0142857
chr6	146920101	147136598	ENSG00000118492	ADGB	FALSE	23968469	0.830287	0.171429
chr12	56598285	56615717	ENSG00000181852	RNF41	FALSE	18741591	0.852941	0.00714286
chr10	129676105	129691211	ENSG00000180745	CLRN3	FALSE	5833536	0.882353	0.0285714
chr15	52043758	52108565	ENSG00000128872	TMOD2	FALSE	32043758	0.793103	0.0428571
chr11	65405568	65418401	ENSG00000213445	SIPA1	FALSE	10761363	0.821429	0.0357143
chr11	104896170	104972158	ENSG00000137752	CASP1	FALSE	30024358	0.801282	NA
chr17	33254878	33308097	ENSG00000132141	CCT6B	FALSE	7991872	0.782123	0.0285714
chr7	1509913	1545489	ENSG00000164880	INTS1	FALSE	1499913	0.942675	0.178571
chr3	62384022	62861054	ENSG00000163618	CADPS	FALSE	27643800	0.810897	0.0785714
chr19	41497204	41524303	ENSG00000197408	CYP2B6	FALSE	13815422	0.87963	0.0857143
chr1	149400131	149400542	ENSG00000203818	HIST2H3PS2	FALSE	24864697	NA	NA
chr12	112079950	112123790	ENSG00000089234	BRAP	FALSE	21718105	0.75	0.0214286
chr1	43312280	43318148	ENSG00000164011	ZNF691	FALSE	43302280	0.857143	0.0214286
chr22	25202236	25323545	ENSG00000167037	SGSM1	FALSE	9202236	0.895062	0.0857143
chr17	60501228	60527454	ENSG00000087995	METTL2A	FALSE	35238222	0.823529	0.0214286
chr1	203136939	203144941	ENSG00000133055	MYBPH	FALSE	46095680	0.88	0.0357143
chr1	149438750	149459549	ENSG00000203817	FAM72C	FALSE	24903316	0.9	NA
chr3	180320646	180588793	ENSG00000145075	CCDC39	FALSE	17423637	0.840824	0.0714286
chr10	115594488	115614142	ENSG00000198924	DCLRE1A	FALSE	19910605	0.710526	0.05
chr19	18529674	18545372	ENSG00000130511	SSBP4	FALSE	6136410	0.875	NA
chr1	149553003	149553787	ENSG00000198161	PPIAL4C	FALSE	25017569	NA	NA
chr15	93014884	93044347	ENSG00000183643	C15orf32	FALSE	9477045	0.904255	0.0214286
chr6	31644461	31651817	ENSG00000204428	LY6G5C	FALSE	27178349	0.869565	NA
chr19	42801185	42807698	ENSG00000079462	PAFAH1B3	FALSE	15119403	0.888889	NA
chr4	124317950	124324910	ENSG00000164056	SPRY1	FALSE	66819366	0.8125	0.0428571
chr9	5890802	5910606	ENSG00000120215	MLANA	FALSE	5880802	0.714286	NA
chr1	149675978	149676609	ENSG00000203815	FAM231D	FALSE	25140544	1	0.0214286
chr5	37288239	37371283	ENSG00000113569	NUP155	FALSE	9034358	0.725352	0.0571429
chr12	75784850	75826468	ENSG00000180481	GLIPR1L2	FALSE	37928156	0.833992	0.0357143
chr19	40353963	40440533	ENSG00000090920	FCGBP	FALSE	12672181	0.85439	0.235714
chr15	93160673	93353114	ENSG00000185442	FAM174B	TRUE	9168278	0.837283	0.0214286
chr11	63273556	63284246	ENSG00000133317	LGALS12	FALSE	8629351	0.886076	0.0428571
chr1	149754227	149764074	ENSG00000150337	FCGR1A	FALSE	25218793	0.868421	NA
chr3	39850405	40301812	ENSG00000170011	MYRIP	FALSE	39840405	0.845866	0.0642857
chr15	65134082	65223118	ENSG00000249240		FALSE	37298274	0.850962	NA
chr8	38268656	38326352	ENSG00000077782	FGFR1	TRUE	5512535	0.807407	0.0285714
chr20	60963688	60982341	ENSG00000149679	CABLES2	FALSE	2033179	0.820513	0.00714286
chr10	124690419	124713919	ENSG00000119965	C10orf88	FALSE	10810828	0.78125	0.0142857
chr4	155456158	155471587	ENSG00000171566	PLRG1	FALSE	35672689	0.75	0.0214286
chr16	134273	188859	ENSG00000103148	NPRL3	FALSE	124273	0.899083	0.0214286
chr4	125585207	125633887	ENSG00000151458	ANKRD50	FALSE	65510389	0.6875	0.0357143
chr6	34759857	34850915	ENSG00000065060	UHRF1BP1	FALSE	23979251	0.809524	0.05
chr10	88195013	88281572	ENSG00000062650	WAPAL	FALSE	45940078	0.763359	0.0142857
chr15	65134088	65160206	ENSG00000241839	PLEKHO2	FALSE	37361186	0.866667	0.0142857
chr1	203148059	203155877	ENSG00000133048	CHI3L1	FALSE	46084744	0.875	0.0214286
chr22	17660194	17702879	ENSG00000093072	CECR1	FALSE	1660194	0.882653	0.00714286
chr3	185361527	185542844	ENSG00000073792	IGF2BP2	TRUE	12469586	0.808824	NA
chr10	102767440	102790890	ENSG00000186862	PDZD7	FALSE	32733857	0.910112	0.0357143
chr6	33176272	33180499	ENSG00000204227	RING1	FALSE	25649667	0.9	0.0285714
chr7	150065879	150109558	ENSG00000196456	ZNF775	FALSE	9019105	0.830357	NA
chr1	43391052	43424530	ENSG00000117394	SLC2A1	FALSE	43381052	0.860215	0.00714286
chr2	95831177	95850065	ENSG00000163067	ZNF2	FALSE	505006	0.786885	0.0285714
chr4	145888264	146019693	ENSG00000164162	ANAPC10	FALSE	45124583	0.732057	0.00714286
chr10	129705325	129884119	ENSG00000132334	PTPRE	FALSE	5640628	0.892121	0.05
chr17	26205340	26221778	ENSG00000232859	LYRM9	FALSE	942334	0.969697	NA
chr17	73201754	73231853	ENSG00000125450	NUP85	FALSE	47938748	0.816667	0.0214286
chr15	52121825	52239492	ENSG00000138594	TMOD3	FALSE	32121825	0.796209	0.0142857
chr2	197504278	197628214	ENSG00000144395	CCDC150	FALSE	45561159	0.77234	0.0285714
chr19	46646363	46664556	ENSG00000204866	IGFL2	FALSE	12454427	0.896907	0.0142857
chr11	1244296	1283406	ENSG00000117983	MUC5B	FALSE	1234296	0.972973	0.171429
chr19	42806250	42814973	ENSG00000188368	PRR19	FALSE	15124468	0.846154	0.0142857
chr6	150139934	150186199	ENSG00000120256	LRP11	FALSE	20918868	0.819444	NA
chr9	6011043	6015618	ENSG00000137040	RANBP6	FALSE	6001043	1	0.0214286
chr4	148999913	149365850	ENSG00000151623	NR3C2	FALSE	41778426	0.83105	0.0857143
chr3	138737873	138739768	ENSG00000184814	PRR23B	FALSE	45233019	0.965517	0.0428571
chr2	27530268	27531313	ENSG00000163794	UCN	FALSE	27520268	1	NA
chr6	137813336	137815531	ENSG00000177468	OLIG3	FALSE	33289536	1	0.0142857
chr4	126237554	126414087	ENSG00000196159	FAT4	TRUE	64730189	0.853101	0.414286
chr3	138760944	138763734	ENSG00000233701	PRR23C	FALSE	45256090	0.945455	0.1
chr4	142142041	142155851	ENSG00000109445	ZNF330	FALSE	48988425	0.73913	NA
chr19	42817477	42829214	ENSG00000167619	TMEM145	FALSE	15135695	0.9375	0.0142857
chr6	136172834	136516712	ENSG00000171408	PDE7B	FALSE	34588355	0.873057	0.0785714
chr6	13266774	13328815	ENSG00000145979	TBC1D7	FALSE	13256774	0.747573	0.00714286
chr19	46733009	46734500	ENSG00000188293	IGFL1	FALSE	12384483	0.9375	NA
chr17	35849937	35873603	ENSG00000161326	DUSP14	FALSE	10586931	0.8125	NA
chr9	6215805	6257983	ENSG00000137033	IL33	FALSE	6205805	0.844595	0.00714286
chr2	29072687	29093167	ENSG00000171103	TRMT61B	FALSE	29062687	0.75	NA
chr6	138188351	138204449	ENSG00000118503	TNFAIP3	TRUE	32900618	0.785714	0.00714286
chr15	28356186	28567298	ENSG00000128731	HERC2	TRUE	8356186	0.735802	0.135714
chr20	60985293	61002589	ENSG00000130701	RBBP8NL	FALSE	2012931	0.898649	0.0714286
chr15	93426526	93571237	ENSG00000173575	CHD2	TRUE	8950155	0.727273	0.0428571
chr15	65204101	65251042	ENSG00000166839	ANKDD1A	FALSE	37270350	0.770992	0.0214286
chr2	25956622	26101385	ENSG00000143970	ASXL2	TRUE	25946622	0.706667	0.0785714
chr1	149754245	149783928	ENSG00000203814	HIST2H2BF	FALSE	25218811	0.813187	0.0214286
chr17	26368763	26523407	ENSG00000087095	NLK	FALSE	1105757	0.724014	0.00714286
chr10	35535953	35860852	ENSG00000108100	CCNY	FALSE	3394083	0.813522	NA
chr2	68350068	68384692	ENSG00000243667	WDR92	FALSE	23941479	0.8	0.00714286
chr6	36322419	36356164	ENSG00000010030	ETV7	FALSE	22474002	0.871658	0.0142857
chr2	20646835	20649200	ENSG00000143878	RHOB	TRUE	20636835	0.5	NA
chr11	65421067	65430565	ENSG00000173039	RELA	TRUE	10776862	0.875	0.0214286
chr3	139074442	139108574	ENSG00000184432	COPB2	FALSE	45569588	0.555556	0.0214286
chr10	70715884	70744829	ENSG00000165732	DDX21	FALSE	28460949	0.8125	0.0142857
chr2	225334867	225450110	ENSG00000036257	CUL3	TRUE	17739263	0.746835	0.0214286
chr1	149784826	149785236	ENSG00000183598	HIST2H3D	FALSE	25249392	1	NA
chr16	67694849	67696681	ENSG00000102981	PARD6A	FALSE	22648072	0.8	0.0142857
chr1	40538379	40563375	ENSG00000131238	PPT1	FALSE	40528379	0.742857	0.0142857
chr1	149804221	149811339	ENSG00000183941	HIST2H4A	FALSE	25268787	NA	NA
chr2	20760208	20850849	ENSG00000118960	HS1BP3	FALSE	20750208	0.80695	0.0214286
chr8	87354967	87490649	ENSG00000123124	WWP1	FALSE	40516080	0.710037	0.0428571
chr20	57414773	57486247	ENSG00000087460	GNAS	TRUE	5529273	0.853994	0.142857
chr15	52230222	52264003	ENSG00000166477	LEO1	FALSE	32230222	0.803571	0.0285714
chr11	554855	560779	ENSG00000185522	C11orf35	FALSE	544855	1	0.0214286
chr10	115614420	115676953	ENSG00000196865	NHLRC2	FALSE	19847794	0.683761	0.0214286
chr16	28889726	28915830	ENSG00000196296	ATP2A1	FALSE	6419971	0.905882	0.0214286
chr12	113376157	113411054	ENSG00000111331	OAS3	FALSE	20430841	0.846154	0.0642857
chr9	6328349	6331900	ENSG00000170777	TPD52L3	FALSE	6318349	0.894737	0.00714286
chr21	34106210	34144169	ENSG00000159086	PAXBP1	FALSE	13975726	0.735294	0.0357143
chr3	128997671	129025029	ENSG00000183624	HMCES	FALSE	35492817	0.854545	0.0214286
chr2	27532360	27548547	ENSG00000115204	MPV17	FALSE	27522360	0.964912	0.0142857
chr22	25331077	25342662	ENSG00000206069	TMEM211	FALSE	9331077	0.9375	0.00714286
chr19	46800303	46846690	ENSG00000124440	HIF3A	FALSE	12272293	0.911765	0.0571429
chr20	61038553	61051026	ENSG00000130700	GATA5	FALSE	1964494	0.866667	0.0142857
chr1	203181955	203242769	ENSG00000133063	CHIT1	TRUE	45997852	0.883991	0.05
chr15	41913422	42062141	ENSG00000174197	MGA	TRUE	21913422	0.798246	0.0857143
chr1	149811110	149812765	ENSG00000203811	HIST2H3C	FALSE	25275676	NA	NA
chr2	175296966	175351822	ENSG00000163328	GPR155	FALSE	67837551	0.625	0.0142857
chr3	130745694	131069309	ENSG00000114670	NEK11	FALSE	37240840	0.831728	0.0571429
chr6	31654726	31671221	ENSG00000204427	ABHD16A	FALSE	27158945	0.826087	0.0214286
chr1	149813505	149814478	ENSG00000183558	HIST2H2AA3	FALSE	25278071	NA	NA
chr22	25348697	25593415	ENSG00000197077	KIAA1671	FALSE	9348697	0.840659	0.0142857
chr9	6413151	6507054	ENSG00000147854	UHRF2	FALSE	6403151	0.8	0.0142857
chr19	42829761	42882921	ENSG00000105429	MEGF8	FALSE	15147979	0.923497	0.121429
chr14	19983559	20020272	ENSG00000187537	POTEM	FALSE	983559	0.931507	0.00714286
chr1	22004791	22110099	ENSG00000090686	USP48	FALSE	21994791	0.809045	0.0142857
chr17	37415384	37558776	ENSG00000108306	FBXL20	FALSE	12152378	0.816901	0.0285714
chr19	18545198	18549111	ENSG00000105655	ISYNA1	FALSE	6132671	0.888889	0.00714286
chr1	149822643	149823191	ENSG00000203812	HIST2H2AA4	FALSE	25287209	NA	NA
chr1	43610824	43622067	ENSG00000186973	FAM183A	FALSE	43600824	0.880952	0.0142857
chr16	202686	204502	ENSG00000130656	HBZ	FALSE	192686	1	NA
chr17	65373575	65693372	ENSG00000154217	PITPNC1	FALSE	40110569	0.825225	0.0142857
chr19	40476912	40487348	ENSG00000013275	PSMC4	FALSE	12795130	0.75	0.00714286
chr7	142977050	142985141	ENSG00000178826	TMEM139	FALSE	16143522	0.88	0.0142857
chr7	36429415	36493400	ENSG00000011426	ANLN	FALSE	21560931	0.767296	0.0285714
chr6	150204511	150219238	ENSG00000164520	RAET1E	FALSE	20885829	0.930233	0.0142857
chr12	66217911	66360075	ENSG00000149948	HMGA2	TRUE	28361217	0.864796	0.0214286
chr15	52244303	52358462	ENSG00000069956	MAPK6	FALSE	32244303	0.823129	NA
chr1	149824181	149825836	ENSG00000203852	HIST2H3A	FALSE	25288747	NA	NA
chr8	145743376	145750557	ENSG00000160959	LRRC14	FALSE	603465	0.789474	0.0142857
chr1	44584522	44600812	ENSG00000171872	KLF17	FALSE	44574522	0.918919	0.0428571
chr9	130159421	130170703	ENSG00000136856	SLC2A8	FALSE	11032728	0.9	NA
chr17	48260650	48278993	ENSG00000108821	COL1A1	TRUE	22997644	0.864865	0.185714
chr16	203891	216767	ENSG00000206177	HBM	FALSE	193891	0.877551	NA
chr13	25457171	25497018	ENSG00000151849	CENPJ	FALSE	6457171	0.777778	0.0357143
chr2	112656056	112787138	ENSG00000153208	MERTK	FALSE	17329885	0.840268	0.0857143
chr1	149825607	149832714	ENSG00000182217	HIST2H4B	FALSE	25290173	NA	NA
chr22	25595817	25603330	ENSG00000100053	CRYBB3	FALSE	9595817	0.914286	0.0142857
chr2	119913819	119916465	ENSG00000144119	C1QL2	FALSE	24587648	1	0.0142857
chr17	47006678	47022479	ENSG00000159210	SNF8	FALSE	21743672	0.666667	NA
chr3	113005777	113160457	ENSG00000206530	WDR52	FALSE	19500923	0.798903	0.0857143
chr4	146019084	146050331	ENSG00000164163	ABCE1	FALSE	45093945	0.775862	0.0142857
chr7	150147718	150176480	ENSG00000171115	GIMAP8	FALSE	8952183	0.907527	0.128571
chr20	61147660	61167971	ENSG00000174407	C20orf166	FALSE	1847549	0.920245	0.0142857
chr10	124713897	124757029	ENSG00000179988	PSTK	FALSE	10767718	0.804688	0.00714286
chr19	41594377	41602100	ENSG00000197838	CYP2A13	FALSE	13912595	0.927273	0.0357143
chr10	79626633	79629368	ENSG00000204049		FALSE	37371698	1	0.00714286
chr22	25615489	25627836	ENSG00000244752	CRYBB2	FALSE	9615489	0.818182	0.0214286
chr1	43629846	43736607	ENSG00000117395	EBNA1BP2	FALSE	43619846	0.867925	0.0642857
chr17	34261522	34270703	ENSG00000161572	LYZL6	FALSE	8998516	0.840909	NA
chr15	52401460	52404972	ENSG00000137875	BCL2L10	FALSE	32401460	0.714286	0.00714286
chr1	149856010	149858232	ENSG00000184678	HIST2H2BE	FALSE	25320576	NA	0.00714286
chr16	222846	223709	ENSG00000188536	HBA2	FALSE	212846	1	NA
chr14	20187174	20296531	ENSG00000176294	OR4N2	FALSE	1187174	0.860929	0.114286
chr12	121407641	121410095	ENSG00000272214		FALSE	12431800	0.727273	0.00714286
chr7	134671259	134832715	ENSG00000146856	AGBL3	FALSE	24295948	0.826271	0.0928571
chr2	38814	46870	ENSG00000184731	FAM110C	FALSE	28814	0.810127	NA
chr3	134316643	134979309	ENSG00000154928	EPHB1	FALSE	40811789	0.858601	0.0857143
chr6	135281516	135424194	ENSG00000112339	HBS1L	FALSE	35680873	0.752688	0.0214286
chr20	3667617	3687775	ENSG00000088827	SIGLEC1	FALSE	3657617	0.923077	0.171429
chr2	119981384	120023228	ENSG00000115107	STEAP3	FALSE	24655213	0.881188	0.0428571
chr5	131593364	131609147	ENSG00000131435	PDLIM4	FALSE	49296113	0.875	0.0214286
chr14	20215587	20216528	ENSG00000182652	OR4Q3	FALSE	1215587	0.884615	0.0857143
chr14	20248401	20249516	ENSG00000176299	OR4M1	FALSE	1248401	0.903846	0.164286
chr10	79734907	79789303	ENSG00000148606	POLR3A	FALSE	37479972	0.874126	0.05
chr1	203274619	203278730	ENSG00000159388	BTG2	TRUE	45961891	0.909091	NA
chr1	46049518	46084566	ENSG00000132780	NASP	FALSE	46039518	0.83908	0.0357143
chr14	20344391	20345468	ENSG00000165762	OR4K2	FALSE	1344391	0.85	0.128571
chr7	150211918	150218161	ENSG00000179144	GIMAP7	FALSE	8910502	0.809524	0.121429
chr1	149858525	149858961	ENSG00000184260	HIST2H2AC	FALSE	25323091	NA	NA
chr14	20388741	20389818	ENSG00000176281	OR4K5	FALSE	1388741	0.789474	0.128571
chr1	44679127	44686353	ENSG00000178028	DMAP1	FALSE	44669127	0.75	0.00714286
chr22	25747385	25801344	ENSG00000100068	LRP5L	FALSE	9747385	0.913333	0.00714286
chr11	63304281	63313934	ENSG00000133321	RARRES3	FALSE	8660076	0.833333	0.0357143
chr14	20403767	20404842	ENSG00000155249	OR4K1	FALSE	1403767	0.965517	0.1
chr1	149859019	149859466	ENSG00000184270	HIST2H2AB	FALSE	25323585	NA	NA
chr20	61272071	61274656	ENSG00000167046		FALSE	1740864	1	0.00714286
chr19	41620337	41634271	ENSG00000197446	CYP2F1	FALSE	13938555	0.869048	0.0428571
chr12	112123857	112194903	ENSG00000111271	ACAD10	FALSE	21646992	0.87	0.0214286
chr14	20443603	20444818	ENSG00000169488	OR4K15	FALSE	1443603	1	0.05
chr6	33218049	33239824	ENSG00000223501	VPS52	FALSE	25590342	0.868852	0.0142857
chr12	75874460	75897633	ENSG00000139278	GLIPR1	FALSE	38017766	0.753247	0.0357143
chr1	203309756	203320617	ENSG00000122176	FMOD	FALSE	45920004	0.790698	0.0285714
chr14	20482419	20483352	ENSG00000169484	OR4K14	FALSE	1482419	1	0.0428571
chr6	43263432	43273276	ENSG00000137204	SLC22A7	FALSE	15556890	0.916667	0.0428571
chr8	11655437	11660077	ENSG00000255046		FALSE	11645437	0.846154	0.00714286
chr4	128544426	128647892	ENSG00000164066	INTU	FALSE	62496384	0.815385	0.0571429
chr22	17840837	18037850	ENSG00000099954	CECR2	FALSE	1840837	0.823067	0.0928571
chr14	20502003	20502919	ENSG00000176253	OR4K13	FALSE	1502003	0.894737	0.0571429
chr1	149859440	149872351	ENSG00000178096	BOLA1	FALSE	25324006	0.897436	NA
chr6	7541808	7586950	ENSG00000096696	DSP	FALSE	7531808	0.853994	0.235714
chr14	20528204	20529142	ENSG00000176246	OR4L1	FALSE	1528204	0.733333	0.0642857
chr12	121416346	121440315	ENSG00000135100	HNF1A	TRUE	12401580	0.892857	0.05
chr2	20866424	20873418	ENSG00000143869	GDF7	FALSE	20856424	0.967742	NA
chr10	90694831	90751147	ENSG00000107796	ACTA2	FALSE	44773600	0.828829	0.0214286
chr15	52413117	52483566	ENSG00000069966	GNB5	FALSE	32413117	0.851852	0.0142857
chr14	20585566	20586597	ENSG00000176230	OR4K17	FALSE	1585566	0.916667	0.0357143
chr11	64513861	64527769	ENSG00000068976	PYGM	FALSE	9869656	0.933333	0.0428571
chr4	142557752	142655140	ENSG00000164136	IL15	FALSE	48489136	0.828479	0.0214286
chr14	20611895	20612821	ENSG00000184394	OR4N5	FALSE	1611895	1	0.0428571
chr6	143072604	143266338	ENSG00000010818	HIVEP2	FALSE	27838729	0.716667	0.1
chr11	63320242	63330855	ENSG00000133328	HRASLS2	FALSE	8676037	0.890909	0.00714286
chr14	20665495	20666605	ENSG00000196832	OR11G2	FALSE	1665495	0.952381	0.05
chr20	61273797	61317137	ENSG00000101187	SLCO4A1	FALSE	1698383	0.872727	0.0428571
chr2	183943287	183964733	ENSG00000162999	DUSP19	FALSE	59224640	0.877193	NA
chr14	20691791	20692964	ENSG00000176219	OR11H6	FALSE	1691791	1	0.0357143
chr14	20710898	20711979	ENSG00000176198	OR11H4	FALSE	1710898	0.875	0.0285714
chr11	63340667	63384355	ENSG00000176485	PLA2G16	FALSE	8696462	0.834225	0.0142857
chr9	6467618	6470375	ENSG00000215066	C9orf38	FALSE	6457618	0.8	0.00714286
chr1	203444956	203460480	ENSG00000188783	PRELP	FALSE	45780141	0.918367	0.0214286
chr3	160822484	160971320	ENSG00000169251	NMD3	FALSE	37041110	0.851747	0.0642857
chr12	28286182	28732883	ENSG00000123106	CCDC91	TRUE	6123811	0.7571	0.00714286
chr6	150238014	150244257	ENSG00000203722	RAET1G	FALSE	20860810	0.92	0.0214286
chr1	40627045	40706593	ENSG00000117000	RLF	FALSE	40617045	0.693642	0.0642857
chr22	25960816	26125261	ENSG00000100077	ADRBK2	FALSE	9960816	0.77193	0.0214286
chr6	99880190	99969604	ENSG00000123552	USP45	FALSE	38050024	0.585586	0.00714286
chr9	6532464	6645650	ENSG00000178445	GLDC	FALSE	6522464	0.815789	0.0357143
chr10	93806449	94050844	ENSG00000107864	CPEB3	TRUE	41473903	0.815661	0.0428571
chr16	226679	227521	ENSG00000206172	HBA1	FALSE	216679	0.5	NA
chr4	150999426	151178609	ENSG00000170390	DCLK2	FALSE	39965667	0.796262	0.05
chr1	203463271	203477992	ENSG00000188770	OPTC	FALSE	45762629	0.909091	0.00714286
chr2	217730	266398	ENSG00000035115	SH3YL1	FALSE	207730	0.7875	0.0214286
chr17	72744791	72765492	ENSG00000109062	SLC9A3R1	FALSE	47481785	0.887097	NA
chr6	136552162	136571473	ENSG00000146410	MTFR2	FALSE	34533594	0.707317	0.0142857
chr11	63391559	63439393	ENSG00000184743	ATL3	FALSE	8747354	0.773585	0.0142857
chr3	11597544	11762220	ENSG00000144560	VGLL4	FALSE	11587544	0.771588	0.0142857
chr11	3011093	3012563	ENSG00000183562		FALSE	3001093	1	0.00714286
chr20	44689624	44718591	ENSG00000124160	NCOA5	FALSE	15320055	0.737705	0.0214286
chr2	20883788	21022882	ENSG00000118961	C2orf43	FALSE	20873788	0.78913	0.0214286
chr6	34845555	34855866	ENSG00000064995	TAF11	FALSE	23974300	0.6	0.0142857
chr3	40351175	40353915	ENSG00000114784	EIF1B	FALSE	40341175	0.5	NA
chr1	149874870	149889434	ENSG00000159164	SV2A	FALSE	25339436	0.883117	0.0357143
chr6	155578643	155635627	ENSG00000029639	TFB1M	FALSE	15469440	0.691358	NA
chr11	560404	564021	ENSG00000099849	RASSF7	FALSE	550404	0.933333	0.0142857
chr1	40711619	40717363	ENSG00000188800	TMCO2	FALSE	40701619	0.95	0.0214286
chr2	201717732	201729422	ENSG00000013441	CLK1	FALSE	41459951	0.307692	0.00714286
chr14	95883831	95942173	ENSG00000176438	SYNE3	FALSE	11397367	0.868421	0.0428571
chr11	65479467	65487075	ENSG00000172977	KAT5	FALSE	10835262	0.727273	0.00714286
chr6	36358328	36410666	ENSG00000179165	PXT1	FALSE	22419500	0.814545	0.0285714
chr2	29117509	29171088	ENSG00000163811	WDR43	FALSE	29107509	0.612245	0.0142857
chr18	21083473	21111746	ENSG00000141452	C18orf8	FALSE	2622575	0.685714	0.0214286
chr22	18043139	18073760	ENSG00000182902	SLC25A18	FALSE	2043139	0.87013	0.0142857
chr15	42066632	42120053	ENSG00000137802	MAPKBP1	FALSE	22066632	0.818898	0.0428571
chr2	183982241	184026408	ENSG00000163002	NUP35	FALSE	59162965	0.741379	0.0142857
chr1	43637820	43720029	ENSG00000243710	WDR65	FALSE	43627820	0.871237	0.135714
chr17	18163848	18169866	ENSG00000177427	MIEF2	FALSE	4093140	0.909091	0.0142857
chr12	56615799	56623638	ENSG00000139579	NABP2	FALSE	18759105	0.882353	0.00714286
chr2	120059801	120124404	ENSG00000186132	C2orf76	FALSE	24733630	0.775641	NA
chr19	41698954	41713444	ENSG00000167600	CYP2S1	FALSE	14017172	0.895238	0.0571429
chr16	67696848	67701168	ENSG00000124074	ENKD1	FALSE	22643585	0.714286	NA
chr6	150263136	150270371	ENSG00000131015	ULBP2	FALSE	20834696	0.863636	0.0142857
chr16	230452	231180	ENSG00000086506	HBQ1	FALSE	220452	NA	NA
chr3	40428647	40470110	ENSG00000168032	ENTPD3	FALSE	40418647	0.790576	0.0214286
chr6	50786436	50815326	ENSG00000008196	TFAP2B	FALSE	8014840	0.747573	0.0357143
chr6	57179603	57513375	ENSG00000146143	PRIM2	FALSE	1316791	0.857542	0.0428571
chr20	44746911	44758502	ENSG00000101017	CD40	FALSE	15377342	0.859155	0.0285714
chr17	60536019	60692842	ENSG00000146872	TLK2	FALSE	35273013	0.734748	0.00714286
chr1	40723779	40759856	ENSG00000084073	ZMPSTE24	FALSE	40713779	0.8	0.0214286
chr13	25591541	25591675	ENSG00000269099		FALSE	6591541	1	0.00714286
chr8	145747761	145752416	ENSG00000254402	LRRC24	FALSE	601606	0.8	0.0142857
chr6	36410544	36458920	ENSG00000112078	KCTD20	FALSE	22371246	0.763441	0.00714286
chr13	25670300	25673389	ENSG00000151846	PABPC3	FALSE	6670300	0.75	0.0642857
chr19	7733930	7735334	ENSG00000104918	RETN	FALSE	7723930	0.846154	0.00714286
chr9	130186661	130207651	ENSG00000196152	ZNF79	FALSE	10995780	0.882353	0.0214286
chr17	33288549	33290205	ENSG00000198783	ZNF830	FALSE	8025543	1	NA
chr13	25735822	25746426	ENSG00000165566	AMER2	FALSE	6735822	0.865385	0.0285714
chr1	203595689	203713209	ENSG00000058668	ATP2B4	TRUE	45527412	0.833866	0.0428571
chr15	65255362	65282648	ENSG00000090487	SPG21	FALSE	37238744	0.784314	0.0142857
chr11	9160372	9286937	ENSG00000184014	DENND5A	FALSE	9150372	0.771654	0.00714286
chr10	94050920	94113721	ENSG00000198060	2021-03-05	FALSE	41411026	0.756098	NA
chr2	26149471	26205618	ENSG00000084731	KIF3C	FALSE	26139471	0.8	0.0214286
chr19	7741514	7744712	ENSG00000183019	C19orf59	FALSE	7731514	0.85	NA
chr12	66245120	66275947	ENSG00000197301		FALSE	28388426	0.851429	0.00714286
chr5	33523640	33892297	ENSG00000151388	ADAMTS12	FALSE	12513344	0.849229	0.128571
chr6	24775159	24786327	ENSG00000112312	GMNN	FALSE	24765159	0.714286	0.0142857
chr13	25802307	25862147	ENSG00000139505	MTMR6	FALSE	6802307	0.75	0.0142857
chr9	130209953	130213684	ENSG00000197958	RPL12	FALSE	10989747	0.5	NA
chr21	34144411	34266043	ENSG00000205930	C21orf49	FALSE	13853852	0.881201	NA
chr11	3022152	3078843	ENSG00000110619	CARS	TRUE	3012152	0.810606	0.0428571
chr16	67700719	67702661	ENSG00000159761	C16orf86	FALSE	22642092	1	NA
chr2	70834750	70995357	ENSG00000075340	ADD2	FALSE	21330814	0.88331	0.142857
chr8	145751117	145754516	ENSG00000213563	C8orf82	FALSE	599506	1	NA
chr17	26638667	26642323	ENSG00000268206		FALSE	1375661	0.75	0.00714286
chr6	34857042	35059179	ENSG00000064999	ANKS1A	FALSE	23770987	0.831144	0.0357143
chr4	155484108	155492238	ENSG00000171564	FGB	FALSE	35652038	0.884615	0.0642857
chr20	61340189	61394123	ENSG00000101188	NTSR1	FALSE	1621397	0.903409	0.0214286
chr16	238968	279462	ENSG00000007392	LUC7L	FALSE	228968	0.77451	0.0214286
chr6	138409642	138428648	ENSG00000112378	PERP	FALSE	32676419	0.767442	NA
chr17	26646121	26655707	ENSG00000109084	TMEM97	FALSE	1383115	0.875	0.00714286
chr2	109150857	109303702	ENSG00000169756	LIMS1	FALSE	13824686	0.796053	0.0214286
chr3	129033615	129035120	ENSG00000184897	H1FX	FALSE	35528761	1	0.00714286
chr19	7743387	7747740	ENSG00000269711		FALSE	7733387	0.764706	NA
chr6	150285143	150294846	ENSG00000111981	ULBP1	FALSE	20810221	0.93617	0.0357143
chr17	3799886	3819794	ENSG00000108405	P2RX1	FALSE	18443212	0.902913	0.0285714
chr10	7601232	7708961	ENSG00000123243	ITIH5	FALSE	7591232	0.844828	0.0785714
chr8	11700033	11726957	ENSG00000164733	CTSB	FALSE	11690033	0.642857	NA
chr19	7745729	7747744	ENSG00000181029	TRAPPC5	FALSE	7735729	0.75	NA
chr3	129120164	129147494	ENSG00000172771	EFCAB12	FALSE	35615310	0.880795	0.0428571
chr17	35874900	35969544	ENSG00000006114	SYNRG	FALSE	10611894	0.765487	0.0285714
chr16	67708434	67753324	ENSG00000141098	GFOD2	FALSE	22591429	0.87037	0.00714286
chr21	34162985	34186053	ENSG00000205929	C21orf62	FALSE	13933842	0.894231	0.0285714
chr12	110436991	110477568	ENSG00000076513	ANKRD13A	FALSE	23364327	0.695122	0.0285714
chr20	61427805	61431945	ENSG00000101189	MRGBP	FALSE	1583575	1	0.00714286
chr17	33307513	33332083	ENSG00000005156	LIG3	FALSE	8044507	0.74359	0.0142857
chr22	18074902	18111584	ENSG00000131100	ATP6V1E1	FALSE	2074902	0.790123	0.00714286
chr14	20724717	20774153	ENSG00000136319	TTC5	FALSE	1724717	0.78481	0.0142857
chr7	36552456	36764154	ENSG00000136250	AOAH	FALSE	21290177	0.872971	0.0571429
chr22	26138111	26427007	ENSG00000133454	MYO18B	FALSE	10138111	0.896104	0.385714
chr6	147525561	147706866	ENSG00000164506	STXBP5	FALSE	23398201	0.657627	0.0428571
chr6	26402465	26415444	ENSG00000026950	BTN3A1	FALSE	26392465	0.90625	0.00714286
chr21	34398153	34401504	ENSG00000205927	OLIG2	TRUE	13718391	0.9	NA
chr19	7753644	7767032	ENSG00000104921	FCER2	FALSE	7743644	0.848485	0.0142857
chr4	73939093	74124515	ENSG00000132466	ANKRD17	FALSE	21278976	0.710744	0.0714286
chr6	155585147	155597682	ENSG00000171217	CLDN20	FALSE	15507385	0.75	NA
chr6	43267448	43276535	ENSG00000146215	CRIP3	FALSE	15553631	0.942308	NA
chr5	110405760	110413722	ENSG00000145777	TSLP	FALSE	61000119	0.830508	0.0142857
chr17	19641297	19652256	ENSG00000108602	ALDH3A1	FALSE	2610750	0.884615	0.0357143
chr11	104912053	104972158	ENSG00000204397	CARD16	FALSE	30024358	0.797794	0.00714286
chr6	138483058	138665800	ENSG00000112379	KIAA1244	FALSE	32439267	0.869077	0.121429
chr17	48712138	48769613	ENSG00000108846	ABCC3	FALSE	23449132	0.909794	0.178571
chr20	61436187	61445352	ENSG00000060491	OGFR	FALSE	1570168	0.888889	0.0142857
chr20	44802372	44937137	ENSG00000149654	CDH22	FALSE	15432803	0.902816	0.0285714
chr21	34442450	34444726	ENSG00000184221	OLIG1	FALSE	13675169	0.833333	0.00714286
chr17	34303529	34308532	ENSG00000161573	CCL16	FALSE	9040523	0.904762	NA
chr10	124750322	124768333	ENSG00000095574	IKZF5	FALSE	10756414	0.65	0.00714286
chr6	155716504	155777037	ENSG00000074771	NOX3	FALSE	15328030	0.884868	0.0642857
chr7	142985308	143004789	ENSG00000106144	CASP2	FALSE	16123874	0.634146	0.00714286
chr5	10275987	10308138	ENSG00000164237	CMBL	FALSE	10265987	0.843931	0.0357143
chr6	150339470	150346668	ENSG00000155918	RAET1L	FALSE	20758399	0.923077	0.00714286
chr4	107236701	107270383	ENSG00000164022	AIMP1	FALSE	54576584	0.694444	0.0142857
chr8	145754563	145911194	ENSG00000147799	ARHGAP39	FALSE	442828	0.827309	0.0285714
chr21	34537776	34542541	ENSG00000229086	C21orf54	FALSE	13577354	0.923077	NA
chr7	134777115	134855547	ENSG00000122783	C7orf49	FALSE	24273116	0.782288	NA
chr11	104963196	104972158	ENSG00000255221	CARD17	FALSE	30024358	0.790698	0.00714286
chr19	41725108	41767671	ENSG00000167601	AXL	FALSE	14043326	0.840183	0.0928571
chr11	63448918	63527363	ENSG00000133318	RTN3	FALSE	8804713	0.716981	0.0142857
chr11	576486	612222	ENSG00000070047	PHRF1	TRUE	566486	0.880952	0.0428571
chr16	67757005	67840555	ENSG00000141084	RANBP10	FALSE	22504198	0.809091	0.0142857
chr6	44221833	44225291	ENSG00000157593	SLC35B2	FALSE	14604875	0.8	0.00714286
chr14	77253588	77292589	ENSG00000013523	ANGEL1	FALSE	30046951	0.861111	0.00714286
chr11	105008448	105010453	ENSG00000255501	CARD18	FALSE	29986063	0.833333	0.0142857
chr15	52484519	52587995	ENSG00000128833	MYO5C	FALSE	32484519	0.878261	0.121429
chr10	121410882	121437331	ENSG00000151929	BAG3	FALSE	14087416	0.860465	0.0142857
chr2	202655184	202760273	ENSG00000138395	CDK15	FALSE	40429100	0.79822	0.0214286
chr10	102790991	102800998	ENSG00000107819	SFXN3	FALSE	32723749	0.818182	0.00714286
chr18	21086148	21166862	ENSG00000141458	NPC1	FALSE	2625250	0.795918	0.0285714
chr7	150264365	150271041	ENSG00000133574	GIMAP4	FALSE	8857622	0.93662	0.0785714
chr20	3713314	3733758	ENSG00000132622	HSPA12B	FALSE	3703314	0.974684	0.0142857
chr2	113914902	113966973	ENSG00000125637	PSD4	FALSE	18588731	0.901763	0.142857
chr13	25875662	25923938	ENSG00000139496	NUPL1	FALSE	6875662	0.731959	0.00714286
chr17	34310327	34329100	ENSG00000213494	CCL14	FALSE	9047321	0.858586	0.00714286
chr17	45771447	45789416	ENSG00000198933	TBKBP1	FALSE	20508441	0.781818	0.0285714
chr12	117890817	118406788	ENSG00000171435	KSR2	FALSE	15435107	0.904019	0.192857
chr19	7793843	7798792	ENSG00000182566	CLEC4G	FALSE	7783843	0.88	0.0285714
chr5	110427414	110466200	ENSG00000134987	WDR36	FALSE	61021773	0.659091	0.05
chr3	180585929	180700541	ENSG00000114416	FXR1	FALSE	17311889	0.815145	0.0357143
chr5	79783788	79838382	ENSG00000152380	FAM151B	FALSE	30378147	0.833333	0.0142857
chr5	90664541	90679176	ENSG00000113369	ARRDC3	FALSE	41258900	0.678571	0.00714286
chr21	34602206	34637980	ENSG00000159110	IFNAR2	FALSE	13481915	0.76	0.00714286
chr4	159587831	159593407	ENSG00000205208	C4orf46	FALSE	31550869	0.75	0.00714286
chr1	149895209	149900236	ENSG00000143368	SF3B4	FALSE	25359775	0.84	0.0357143
chr9	6720863	7175648	ENSG00000107077	KDM4C	FALSE	6710863	0.781742	0.0214286
chr7	150322463	150329473	ENSG00000133561	GIMAP6	FALSE	8799190	0.925134	0.114286
chr9	130213765	130265780	ENSG00000148356	LRSAM1	FALSE	10937651	0.816514	0.0214286
chr11	105480721	105852819	ENSG00000152578	GRIA4	FALSE	29143697	0.828031	0.0928571
chr1	40766159	40783488	ENSG00000049089	COL9A2	FALSE	40756159	0.906977	0.0857143
chr2	225629807	225907162	ENSG00000135905	DOCK10	FALSE	17282211	0.758621	0.0428571
chr17	65713949	65740647	ENSG00000130935	NOL11	FALSE	40450943	0.75	0.0285714
chr15	93586636	93632433	ENSG00000182175	RGMA	FALSE	8888959	0.882979	0.0571429
chr4	159593277	159630775	ENSG00000171503	ETFDH	FALSE	31513501	0.796875	0.00714286
chr5	96271098	96373219	ENSG00000113441	LNPEP	FALSE	46865457	0.77027	0.0285714
chr7	1570350	1582679	ENSG00000198517	MAFK	FALSE	1560350	0.774194	0.00714286
chr6	150384286	150390231	ENSG00000131019	ULBP3	FALSE	20714836	0.975	0.00714286
chr4	128651533	128695448	ENSG00000151475	SLC25A31	FALSE	62448828	0.838631	0.0642857
chr4	142944313	143768585	ENSG00000109452	INPP4B	FALSE	47375691	0.757483	0.0214286
chr12	57125380	57146157	ENSG00000198056	PRIM1	FALSE	19268686	0.775	NA
chr11	65482367	65488418	ENSG00000172922	RNASEH2C	FALSE	10838162	0.571429	NA
chr10	115674530	115676949	ENSG00000234631		FALSE	19847798	0.75	NA
chr6	143381633	143661441	ENSG00000146416	AIG1	FALSE	27443626	0.813319	0.00714286
chr1	203734304	203745361	ENSG00000122188	LAX1	FALSE	45495260	0.82	0.0214286
chr3	129149787	129158878	ENSG00000129071	MBD4	FALSE	35644933	0.777778	0.0285714
chr10	115803806	115806667	ENSG00000043591	ADRB1	FALSE	19718080	0.857143	0.00714286
chr3	40498783	40503861	ENSG00000188846	RPL14	FALSE	40488783	0.846154	NA
chr2	120124497	120130126	ENSG00000155368	DBI	FALSE	24798326	0.9	0.0142857
chr7	107788068	108097161	ENSG00000091129	NRCAM	FALSE	46733737	0.793548	0.05
chr7	1581871	1600457	ENSG00000164855	TMEM184A	FALSE	1571871	0.944444	0.05
chr5	125877533	125931110	ENSG00000164904	ALDH7A1	FALSE	54974150	0.8	0.0142857
chr19	46850251	46896238	ENSG00000011485	PPP5C	FALSE	12222745	0.889908	0.0285714
chr20	61447596	61472511	ENSG00000092758	COL9A3	FALSE	1543009	0.894231	0.0857143
chr12	110465872	110511491	ENSG00000174456	C12orf76	FALSE	23330404	0.727273	0.00714286
chr16	28915742	28947847	ENSG00000177548	RABEP2	FALSE	6387954	0.86	0.0428571
chr10	27961804	28034989	ENSG00000150051	MKX	FALSE	11219946	0.891697	0.0571429
chr2	171784974	171823639	ENSG00000115806	GORASP2	FALSE	71365734	0.734375	0.0142857
chr2	26251074	26251481	ENSG00000268412		FALSE	26241074	0.5	0.0285714
chr11	1295601	1330884	ENSG00000078902	TOLLIP	FALSE	1285601	0.75	0.0285714
chr1	43735665	43739673	ENSG00000179178	TMEM125	FALSE	43725665	0.965517	0.0214286
chr5	35051012	35051198	ENSG00000269027		FALSE	11354443	1	NA
chr19	18553473	18632937	ENSG00000105656	ELL	TRUE	6048845	0.851528	0.0285714
chr4	146031990	146101313	ENSG00000164164	OTUD4	FALSE	45042963	0.669725	0.0214286
chr10	121485609	121588652	ENSG00000198825	INPP5F	FALSE	13936095	0.710983	0.0285714
chr4	159630286	159644548	ENSG00000171497	PPID	FALSE	31499728	0.764706	0.00714286
chr11	65543364	65548273	ENSG00000254470	AP5B1	FALSE	10899159	1	0.00714286
chr4	128702976	128761888	ENSG00000164070	HSPA4L	FALSE	62382388	0.672131	0.0214286
chr2	26256976	26360323	ENSG00000084733	RAB10	FALSE	26246976	0.752747	NA
chr17	79163393	79196799	ENSG00000141577	AZI1	FALSE	53900387	0.923077	0.05
chr21	34619079	34655517	ENSG00000249624		FALSE	13464378	0.695652	NA
chr15	65294845	65321977	ENSG00000103707	MTFMT	FALSE	37199415	0.833333	0.00714286
chr11	65554493	65564690	ENSG00000172818	OVOL1	FALSE	10910288	0.886792	0.00714286
chr1	44686742	44820932	ENSG00000117419	ERI3	FALSE	44676742	0.853659	0.0142857
chr6	136578001	136610989	ENSG00000029363	BCLAF1	TRUE	34494078	0.738636	0.207143
chr2	95940201	95957056	ENSG00000155066	PROM2	FALSE	614030	0.943089	0.0571429
chr12	66291518	66317967	ENSG00000267942		FALSE	28434824	0.870968	0.00714286
chr21	34638663	34669539	ENSG00000243646	IL10RB	FALSE	13450356	0.77551	0.0142857
chr19	40490041	40523514	ENSG00000187187	ZNF546	FALSE	12808259	0.755102	0.0428571
chr12	66516842	66524548	ENSG00000139233	LLPH	FALSE	28660148	0.882353	NA
chr1	203764782	203823252	ENSG00000058673	ZC3H11A	FALSE	45417369	0.692308	0.0714286
chr3	131100515	131107674	ENSG00000198585	NUDT16	FALSE	37595661	0.666667	NA
chr1	43747554	43751288	ENSG00000253313	C1orf210	FALSE	43737554	0.870968	0.00714286
chr2	62051989	62081278	ENSG00000170264	FAM161A	FALSE	30244893	0.820896	0.0142857
chr10	35894338	35897863	ENSG00000177291	GJD4	FALSE	3357072	0.933333	0.0285714
chr3	40518604	40531727	ENSG00000177873	ZNF619	FALSE	40508604	0.857143	0.0142857
chr6	150464212	150571493	ENSG00000198729	PPP1R14C	FALSE	20533574	0.854103	0.00714286
chr13	25946209	26599989	ENSG00000132932	ATP8A2	FALSE	6946209	0.83956	0.0785714
chr17	45810610	45823485	ENSG00000073861	TBX21	FALSE	20547604	0.873418	0.0285714
chr11	65590493	65629497	ENSG00000172757	CFL1	FALSE	10946288	0.830189	0.00714286
chr5	35617946	35814713	ENSG00000152582	SPEF2	FALSE	10590928	0.844538	0.242857
chr6	157099063	157531913	ENSG00000049618	ARID1B	TRUE	13573154	0.714946	0.0642857
chr17	73584139	73622929	ENSG00000266714	MYO15B	FALSE	48321133	0.879699	0.0214286
chr11	64532078	64546258	ENSG00000168066	SF1	TRUE	9887873	0.821429	0.0142857
chr17	3827169	3867736	ENSG00000074370	ATP2A3	FALSE	18395270	0.881279	0.0857143
chr1	22138758	22151714	ENSG00000187942	LDLRAD2	FALSE	22128758	0.961538	0.0142857
chr7	150382785	150390729	ENSG00000106560	GIMAP2	FALSE	8737934	0.910448	0.05
chr10	35927177	35930362	ENSG00000177283	FZD8	FALSE	3324573	0.777778	0.0214286
chr4	159690290	159829201	ENSG00000052795	FNIP2	FALSE	31315075	0.738806	0.0428571
chr12	66517697	66563765	ENSG00000228144		FALSE	28661003	0.783333	NA
chr2	68358370	68488362	ENSG00000273398		FALSE	23837809	0.707581	0.0642857
chr20	44978167	44993043	ENSG00000080189	SLC35C2	FALSE	15608598	0.888889	0.0214286
chr1	43766664	43788779	ENSG00000066056	TIE1	FALSE	43756664	0.901042	0.128571
chr14	20779527	20801471	ENSG00000100814	CCNB1IP1	TRUE	1779527	0.652174	0.00714286
chr17	26655352	26662515	ENSG00000109083	IFT20	FALSE	1392346	0.769231	0.00714286
chr11	105866350	105893130	ENSG00000170903	MSANTD4	FALSE	29103386	0.779661	NA
chr15	28623767	28637170	ENSG00000153684	GOLGA8F	FALSE	8623767	1	NA
chr5	131630136	131679899	ENSG00000197208	SLC22A4	FALSE	49225361	0.79661	0.00714286
chr3	161062580	161090668	ENSG00000196542	SPTSSB	FALSE	36921762	0.872483	0.0357143
chr21	34696734	34732168	ENSG00000142166	IFNAR1	TRUE	13387727	0.776471	0.0142857
chr6	138537129	138539627	ENSG00000254440	PBOV1	FALSE	32565440	0.928571	0.00714286
chr10	124768495	124817827	ENSG00000196177	ACADSB	FALSE	10706920	0.710345	0.0142857
chr17	27046411	27051377	ENSG00000198242	RPL23A	FALSE	1783405	0.8	NA
chr4	107842959	108204963	ENSG00000155011	DKK2	FALSE	55182842	0.86781	0.0857143
chr2	68384976	68403370	ENSG00000115946	PNO1	FALSE	23922801	0.75	0.00714286
chr12	118451393	118470935	ENSG00000111445	RFC5	FALSE	15370960	0.804348	NA
chr17	72766686	72772506	ENSG00000109065	NAT9	FALSE	47503680	0.8125	NA
chr20	3734155	3749034	ENSG00000101220	C20orf27	FALSE	3724155	0.864407	0.00714286
chr16	284545	319942	ENSG00000167930	ITFG3	FALSE	274545	0.842975	0.0428571
chr4	151185594	151936879	ENSG00000198589	LRBA	FALSE	39207397	0.774009	0.0928571
chr22	18111621	18213388	ENSG00000099968	BCL2L13	FALSE	2111621	0.782407	NA
chr1	46085716	46089729	ENSG00000159588	CCDC17	FALSE	46075716	0.333333	NA
chr18	47808713	47814674	ENSG00000154832	CXXC1	FALSE	29347815	0.705882	0.0285714
chr10	115880621	115933979	ENSG00000165813	C10orf118	FALSE	19590768	0.810606	0.0214286
chr12	66517709	66563852	ENSG00000155957	TMBIM4	FALSE	28661015	0.783333	0.00714286
chr17	34310692	34328660	ENSG00000161574	CCL15-CCL14	FALSE	9047686	0.85567	0.00714286
chr1	203765437	203769686	ENSG00000257315	ZBED6	FALSE	45470935	0.666667	0.0142857
chr6	138699042	138704212	ENSG00000262543		FALSE	32400855	0.791667	0.00714286
chr19	18642561	18654887	ENSG00000105701	FKBP8	FALSE	6026895	0.828571	0.0142857
chr1	203830731	203839678	ENSG00000182004	SNRPE	FALSE	45400943	0.809524	NA
chr6	138724668	138743334	ENSG00000051620	HEBP2	FALSE	32361733	0.807692	NA
chr6	150690028	150727105	ENSG00000009765	IYD	FALSE	20377962	0.84153	0.0571429
chr5	10353815	10440500	ENSG00000145495	2021-03-06	FALSE	10343815	0.705882	0.00714286
chr11	65601112	65624367	ENSG00000172803	SNX32	FALSE	10956907	0.803571	0.0142857
chr3	161214596	161221730	ENSG00000182447	OTOL1	FALSE	36790700	0.873494	0.192857
chr17	18174742	18218321	ENSG00000177302	TOP3A	FALSE	4044685	0.684783	0.0428571
chr14	31343720	31364271	ENSG00000100473	COCH	FALSE	12343720	0.819444	0.0357143
chr7	150413645	150421372	ENSG00000213203	GIMAP1	FALSE	8707291	0.858639	0.107143
chr8	145946298	145981802	ENSG00000198169	ZNF251	FALSE	372220	0.813084	0.0214286
chr4	159814286	159959912	ENSG00000164123	C4orf45	FALSE	31184364	0.850482	0.00714286
chr1	22148738	22263790	ENSG00000142798	HSPG2	TRUE	22138738	0.864615	0.15
chr11	612553	615999	ENSG00000185507	IRF7	FALSE	602553	1	0.00714286
chr12	56347889	56367101	ENSG00000185664	PMEL	FALSE	18491195	0.77193	0.0142857
chr10	23384435	23410942	ENSG00000148450	MSRB2	FALSE	15843993	0.75	0.00714286
chr6	44225903	44233500	ENSG00000146232	NFKBIE	TRUE	14596666	0.791667	0.0428571
chr4	108511433	108641608	ENSG00000138801	PAPSS1	FALSE	55851316	0.820449	0.0142857
chr5	17065707	17276943	ENSG00000176788	BASP1	FALSE	17055707	0.847953	0.0214286
chr11	9302201	9336327	ENSG00000166471	TMEM41B	FALSE	9292201	0.763889	NA
chr1	149900543	149908791	ENSG00000014914	MTMR11	FALSE	25365109	0.821429	0.05
chr11	1295809	1296033	ENSG00000267950		FALSE	1285809	0.5	0.0142857
chr2	175424300	175547644	ENSG00000115935	WIPF1	FALSE	67641729	0.769759	0.05
chr6	51480098	51952423	ENSG00000170927	PKHD1	FALSE	6877743	0.812022	0.221429
chr3	139171726	139199589	ENSG00000114113	RBP2	FALSE	45666872	0.88	0.00714286
chr4	17616254	17635728	ENSG00000118579	MED28	FALSE	17606254	0.666667	NA
chr19	7804879	7812464	ENSG00000090659	CD209	TRUE	7794879	0.8875	0.0714286
chr8	120177273	120257913	ENSG00000147676	MAL2	FALSE	26096109	0.886284	0.0214286
chr22	26565440	26779562	ENSG00000100095	SEZ6L	FALSE	10565440	0.884179	0.164286
chr1	204042243	204096863	ENSG00000143842	SOX13	FALSE	45143758	0.881579	0.0285714
chr3	164696686	164796283	ENSG00000090402	SI	FALSE	33216147	0.807043	0.292857
chr4	160025330	160281321	ENSG00000109756	RAPGEF2	FALSE	30862955	0.65625	0.0285714
chr10	28064115	28287977	ENSG00000169126	ARMC4	FALSE	10966958	0.882564	0.2
chr12	56623833	56631630	ENSG00000139540	SLC39A5	FALSE	18767139	0.882353	0.0428571
chr7	150419341	150447121	ENSG00000196329	GIMAP5	FALSE	8681542	0.906191	0.05
chr5	154266976	154317769	ENSG00000082516	GEMIN5	FALSE	26587491	0.822222	0.0357143
chr9	130267618	130341268	ENSG00000136830	FAM129B	FALSE	10862163	0.791367	0.0214286
chr5	131705444	131731306	ENSG00000197375	SLC22A5	FALSE	49173954	0.862069	0.0142857
chr17	43513266	43568115	ENSG00000225190	PLEKHM1	FALSE	18250260	0.894737	0.0214286
chr4	17630929	17783135	ENSG00000047662	FAM184B	FALSE	17620929	0.872027	0.0928571
chr9	7796490	7888380	ENSG00000137038	TMEM261	FALSE	7786490	0.818487	NA
chr21	34775202	34851655	ENSG00000159128	IFNGR2	FALSE	13268240	0.735043	NA
chr7	1606966	1610641	ENSG00000157778	PSMG3	FALSE	1596966	0.8	NA
chr8	145998499	146012730	ENSG00000196378	ZNF34	FALSE	341292	0.829268	0.0285714
chr5	19473060	20575982	ENSG00000145526	CDH18	FALSE	19463060	0.836728	0.171429
chr15	65337708	65345734	ENSG00000186198	SLC51B	FALSE	37175658	0.916667	0.00714286
chr6	39760142	39872648	ENSG00000146122	DAAM2	FALSE	18957518	0.790503	0.0642857
chr12	101786898	101801598	ENSG00000120805	ARL1	FALSE	32040297	0.714286	NA
chr2	74682150	74688011	ENSG00000115274	INO80B	FALSE	17638160	0.666667	NA
chr3	139236276	139258671	ENSG00000114115	RBP1	FALSE	45731422	0.85	0.00714286
chr10	94211441	94333833	ENSG00000119912	IDE	FALSE	41190914	0.766949	0.0214286
chr19	42891171	42894439	ENSG00000105427	CNFN	FALSE	15209389	0.666667	0.00714286
chr11	9406169	9469673	ENSG00000205339	IPO7	FALSE	9396169	0.710744	0.0285714
chr15	65345679	65369028	ENSG00000103710	RASL12	FALSE	37152364	0.889831	0.0142857
chr3	11831916	11888393	ENSG00000144559	TAMM41	FALSE	11821916	0.82069	0.0142857
chr12	75890684	75905416	ENSG00000111615	KRR1	FALSE	38033990	0.730769	0.0142857
chr11	1411129	1483919	ENSG00000174672	BRSK2	FALSE	1401129	0.903226	0.0428571
chr2	21224301	21266945	ENSG00000084674	APOB	TRUE	21214301	0.883663	0.392857
chr4	17802278	17812381	ENSG00000163257	DCAF16	FALSE	17792278	0.555556	0.0142857
chr10	36810649	36813162	ENSG00000229644	NAMPTL	FALSE	2441773	0.853659	0.157143
chr11	65624597	65635124	ENSG00000172732	MUS81	FALSE	10980392	0.923077	NA
chr6	36461669	36515247	ENSG00000112079	STK38	FALSE	22314919	0.728571	0.0142857
chr10	102821598	102827888	ENSG00000107821	KAZALD1	FALSE	32696859	0.882353	0.00714286
chr1	46092976	46153785	ENSG00000159592	GPBP1L1	FALSE	46082976	0.775194	0.00714286
chr5	79852574	79866307	ENSG00000189127	ANKRD34B	FALSE	30446933	0.957746	0.05
chr19	42905659	42931578	ENSG00000079435	LIPE	FALSE	15223877	0.877193	0.0571429
chr6	153019030	153045702	ENSG00000120279	MYCT1	FALSE	18059365	0.870504	0.0357143
chr11	57520715	57587018	ENSG00000198561	CTNND1	TRUE	2876510	0.707692	0.0357143
chr15	65369154	65372276	ENSG00000234438	KBTBD13	FALSE	37149116	1	0.0214286
chr17	27051366	27054953	ENSG00000160606	TLCD1	FALSE	1788360	1	NA
chr15	65385338	65407535	ENSG00000246922	UBAP1L	FALSE	37113857	0.757576	0.05
chr6	18368779	18469105	ENSG00000137393	RNF144B	FALSE	18358779	0.802326	NA
chr18	21178890	21242849	ENSG00000154065	ANKRD29	FALSE	2717992	0.820513	0.05
chr13	26442061	26455095	ENSG00000215549		FALSE	7442061	0.813559	NA
chr7	1727755	1787590	ENSG00000225968	ELFN1	FALSE	1717755	0.914286	0.0785714
chr4	17812525	17846485	ENSG00000109805	NCAPG	FALSE	17802525	0.757576	0.0142857
chr13	26452422	26452679	ENSG00000268344		FALSE	7452422	NA	NA
chr13	26618735	26625169	ENSG00000180730	SHISA2	FALSE	7618735	0.708333	0.00714286
chr6	153071933	153080900	ENSG00000146469	VIP	FALSE	18024167	0.849057	0.0357143
chr15	93749295	93751277	ENSG00000269360		FALSE	8770115	0.851852	0.05
chr7	1732446	1733961	ENSG00000205971		FALSE	1722446	1	NA
chr10	37414785	37673039	ENSG00000148513	ANKRD30A	TRUE	1581896	0.8663	0.314286
chr20	3758151	3762095	ENSG00000101222	SPEF1	FALSE	3748151	0.875	NA
chr7	36893961	37488852	ENSG00000155849	ELMO1	FALSE	20565479	0.860266	0.0928571
chr10	70748487	70776738	ENSG00000198954	KIAA1279	FALSE	28493552	0.795455	0.00714286
chr6	43274872	43337216	ENSG00000171467	ZNF318	FALSE	15492950	0.822967	0.107143
chr15	42073346	42076229	ENSG00000268632		FALSE	22073346	0.7	NA
chr6	44238203	44275243	ENSG00000178233	TMEM151B	FALSE	14554923	0.893401	0.0357143
chr11	63580860	63595190	ENSG00000168005	C11orf84	FALSE	8936655	0.829268	0.00714286
chr15	52599480	52821247	ENSG00000197535	MYO5A	TRUE	32599480	0.673036	0.0642857
chr3	134321980	134370478	ENSG00000174611	KY	FALSE	40817126	0.889362	0.05
chr13	26706253	26796791	ENSG00000127870	RNF6	TRUE	7706253	0.85814	0.0285714
chr16	299546	319942	ENSG00000269881		FALSE	289546	0.8375	0.0357143
chr6	138743180	139013708	ENSG00000135540	NHSL1	FALSE	32091359	0.780488	0.0928571
chr1	204100190	204121307	ENSG00000143845	ETNK2	FALSE	45119314	0.836364	0.0142857
chr5	68462837	68474072	ENSG00000134057	CCNB1	FALSE	19057196	0.848485	0.0214286
chr4	128802016	128820350	ENSG00000142731	PLK4	FALSE	62323926	0.857143	0.0214286
chr7	150488373	150498448	ENSG00000106565	TMEM176B	FALSE	8630215	0.902439	0.05
chr3	113161565	113234034	ENSG00000163611	SPICE1	FALSE	19656711	0.787709	0.00714286
chr4	162305049	163085187	ENSG00000168843	FSTL5	FALSE	28059089	0.814022	0.0928571
chr5	79922047	79950802	ENSG00000228716	DHFR	FALSE	30516406	0.783333	NA
chr2	112812800	112876895	ENSG00000153214	TMEM87B	FALSE	17486629	0.776398	NA
chr21	34804792	34852318	ENSG00000142188	TMEM50B	FALSE	13267577	0.792683	0.0142857
chr15	94774767	95023632	ENSG00000140563	MCTP2	FALSE	7497760	0.86156	0.142857
chr6	36562145	36573377	ENSG00000112081	SRSF3	TRUE	22256789	0.7	0.0142857
chr15	42120283	42140345	ENSG00000243708	PLA2G4B	FALSE	22120283	0.888889	0.0428571
chr19	40534167	40562116	ENSG00000128000	ZNF780B	FALSE	12852385	0.894737	0.0428571
chr1	43803478	43818443	ENSG00000117400	MPL	TRUE	43793478	0.855263	0.0357143
chr15	65409717	65426174	ENSG00000090470	PDCD7	FALSE	37095218	0.705882	0.0142857
chr19	46913629	46916841	ENSG00000169515	CCDC8	FALSE	12202142	0.8	0.0214286
chr2	185463093	185804219	ENSG00000170396	ZNF804A	FALSE	57385154	0.837769	0.25
chr8	142127377	142205907	ENSG00000105339	DENND3	FALSE	4148115	0.856618	0.0571429
chr19	46969748	46974820	ENSG00000182013	PNMAL1	FALSE	12144163	0.714286	0.00714286
chr17	37560538	37607539	ENSG00000125686	MED1	FALSE	12297532	0.75	0.0285714
chr7	1855429	2272878	ENSG00000002822	MAD1L1	FALSE	1845429	0.859259	0.0214286
chr2	201735630	201754026	ENSG00000240344	PPIL3	FALSE	41435347	0.645161	NA
chr12	110562140	110656602	ENSG00000122970	IFT81	FALSE	23185293	0.754011	0.0357143
chr16	318300	325980	ENSG00000076344	RGS11	FALSE	308300	0.827586	0.0571429
chr7	134832824	134850967	ENSG00000146859	TMEM140	FALSE	24277696	0.666667	NA
chr1	44870866	45117396	ENSG00000187147	RNF220	FALSE	44860866	0.888471	0.0214286
chr15	28764757	28778160	ENSG00000183629	GOLGA8G	FALSE	8764757	1	NA
chr1	46152886	46160115	ENSG00000159596	TMEM69	FALSE	46142886	0.714286	NA
chr16	67840668	67866051	ENSG00000102904	TSNAXIP1	FALSE	22478702	0.914286	0.0357143
chr10	79793518	79816570	ENSG00000138326	RPS24	FALSE	37538583	0.813559	0.0285714
chr17	45884738	45899200	ENSG00000006025	OSBPL7	FALSE	20621732	0.96	0.0285714
chr19	46984053	47104457	ENSG00000230510	PPP5D1	FALSE	12014526	0.827731	0.00714286
chr12	113416200	113449528	ENSG00000111335	OAS2	FALSE	20392367	0.843931	0.05
chr12	125671382	126146917	ENSG00000139364	TMEM132B	FALSE	7694978	0.893577	0.171429
chr6	153291664	153304714	ENSG00000112029	FBXO5	FALSE	17800353	0.952381	0.00714286
chr11	9481747	9482010	ENSG00000268403		FALSE	9471747	NA	NA
chr20	3764498	3767337	ENSG00000125817	CENPB	FALSE	3754498	1	0.00714286
chr6	143743969	143771810	ENSG00000189007	ADAT2	FALSE	27333257	0.843137	0.00714286
chr7	134832797	134832916	ENSG00000229974		FALSE	24295747	NA	NA
chr19	42932440	42947200	ENSG00000189377	CXCL17	FALSE	15250658	0.758621	0.00714286
chr5	96424779	96519354	ENSG00000251606		FALSE	47019138	0.878788	0.00714286
chr3	139279022	139396859	ENSG00000163864	NMNAT3	FALSE	45774168	0.869565	0.05
chr4	155504278	155511918	ENSG00000171560	FGA	FALSE	35632358	0.883721	0.142857
chr22	18216906	18257536	ENSG00000015475	BID	FALSE	2216906	0.854701	0.00714286
chr13	26828276	26979375	ENSG00000132964	CDK8	FALSE	7828276	0.731903	0.0214286
chr3	131181056	131221827	ENSG00000114686	MRPL3	FALSE	37676202	0.695122	0.0142857
chr6	24797549	24799117	ENSG00000260286	C6orf229	FALSE	24787549	1	0.00714286
chr1	46159996	46216322	ENSG00000197429	IPP	FALSE	46149996	0.767606	0.0357143
chr5	96427574	96478576	ENSG00000145721	LIX1	FALSE	47021933	0.898026	0.0142857
chr19	40575059	40596845	ENSG00000197782	ZNF780A	TRUE	12893277	0.810127	0.05
chr11	105921825	105948492	ENSG00000182359	KBTBD3	FALSE	29048024	0.685714	0.0214286
chr21	34860497	34864027	ENSG00000177692	DNAJC28	FALSE	13255868	0.714286	0.0357143
chr7	134868590	134896316	ENSG00000105875	WDR91	FALSE	24232347	0.807692	0.0357143
chr6	157710418	157744633	ENSG00000215712	TMEM242	FALSE	13360434	0.737705	NA
chr6	150920999	151164799	ENSG00000120278	PLEKHG1	FALSE	19940268	0.816393	0.0357143
chr14	95982473	95984248	ENSG00000258572		FALSE	11355292	0.666667	NA
chr1	40810522	40888998	ENSG00000084070	SMAP2	FALSE	40800522	0.849817	0.0214286
chr3	156257929	156272973	ENSG00000114850	SSR3	FALSE	41739457	0.741935	NA
chr10	102849078	102890883	ENSG00000236311	TLX1NB	FALSE	32633864	0.926724	0.0142857
chr1	43824626	43828874	ENSG00000117399	CDC20	FALSE	43814626	0.777778	0.0285714
chr2	186603355	186698017	ENSG00000188738	FSIP2	FALSE	56491356	0.823765	0.435714
chr2	197627756	197664449	ENSG00000119041	GTF3C3	FALSE	45524924	0.615385	0.00714286
chr14	95999840	96011061	ENSG00000182512	GLRX5	FALSE	11328479	0.807692	0.00714286
chr6	36644305	36655116	ENSG00000124762	CDKN1A	TRUE	22175050	0.852941	0.0214286
chr10	102882536	102883624	ENSG00000269259		FALSE	32641123	1	NA
chr6	19837617	19840915	ENSG00000172201	ID4	FALSE	19827617	0.5	NA
chr1	204123944	204135465	ENSG00000143839	REN	FALSE	45105156	0.885714	0.0714286
chr11	65633912	65641063	ENSG00000172638	EFEMP2	FALSE	10989707	0.916667	0.00714286
chr22	26825239	26840981	ENSG00000128203	ASPHD2	FALSE	10825239	0.892857	0.0214286
chr10	102889257	102897545	ENSG00000107807	TLX1	TRUE	32627202	0.958333	0.0142857
chr2	44502599	44548633	ENSG00000138079	SLC3A1	FALSE	44492599	0.818841	0.0357143
chr6	24797601	25042238	ENSG00000111913	FAM65B	FALSE	24787601	0.834844	0.0214286
chr8	11831446	11832108	ENSG00000205884	DEFB136	FALSE	11821446	1	NA
chr17	34310692	34317306	ENSG00000266956		FALSE	9047686	0.878049	NA
chr11	105946228	105969437	ENSG00000149313	AASDHPPT	FALSE	29027079	0.689655	0.0142857
chr6	35085848	35116387	ENSG00000124678	TCP11	FALSE	23713779	0.858209	0.0357143
chr14	96152754	96158980	ENSG00000213231	TCL1B	FALSE	11180560	0.878378	0.0285714
chr20	3767578	3786762	ENSG00000101224	CDC25B	FALSE	3757578	0.820513	0.0214286
chr8	11839830	11842099	ENSG00000205883	DEFB135	FALSE	11829830	1	NA
chr17	60704762	60770958	ENSG00000011028	MRC2	FALSE	35441756	0.888337	0.0857143
chr11	9481866	9550071	ENSG00000166478	ZNF143	FALSE	9471866	0.802083	0.0142857
chr5	33936491	33939023	ENSG00000182631	RXFP3	FALSE	12466618	1	0.0214286
chr19	43011456	43065386	ENSG00000079385	CEACAM1	FALSE	15329674	0.879377	0.0285714
chr12	70002351	70004942	ENSG00000198812	LRRC10	FALSE	32145657	0.75	0.0357143
chr10	75668935	75677255	ENSG00000122861	PLAU	FALSE	33414000	0.897436	0.0357143
chr10	102986733	102989551	ENSG00000138136	LBX1	FALSE	32535196	0.8	NA
chr8	11850692	11853821	ENSG00000205882	DEFB134	FALSE	11840692	1	0.00714286
chr7	75398851	75419214	ENSG00000006606	CCL26	FALSE	14344520	0.927632	0.00714286
chr9	130374544	130457460	ENSG00000136854	STXBP1	FALSE	10745971	0.795031	0.0285714
chr6	99990256	100016849	ENSG00000112237	CCNC	TRUE	38160090	0.53125	0.00714286
chr8	11870545	11873043	ENSG00000255098		FALSE	11860545	0.75	NA
chr6	20100935	20212670	ENSG00000172197	MBOAT1	FALSE	20090935	0.740157	0.00714286
chr6	147830063	148058683	ENSG00000203727	SAMD5	FALSE	23046384	0.793651	NA
chr8	11921898	11929256	ENSG00000233050		FALSE	11911898	1	NA
chr7	143013219	143049176	ENSG00000188037	CLCN1	FALSE	16079487	0.829912	0.107143
chr10	124895478	124897257	ENSG00000188620	HMX3	FALSE	10627490	NA	NA
chr5	21750782	22853731	ENSG00000154162	CDH12	FALSE	21740782	0.837362	0.142857
chr12	57145945	57181574	ENSG00000025423	HSD17B6	FALSE	19289251	0.862275	0.0428571
chr17	7825177	7833121	ENSG00000170049	KCNAB3	FALSE	14429885	0.766667	0.0142857
chr8	11961898	11973025	ENSG00000215343	ZNF705D	FALSE	11951898	0.5	NA
chr10	124907638	124910188	ENSG00000188816	HMX2	FALSE	10614559	1	0.00714286
chr5	37379314	37753537	ENSG00000082068	WDR70	FALSE	8652104	0.776867	0.0285714
chr7	75440983	75452674	ENSG00000106178	CCL24	FALSE	14386652	0.88764	0.00714286
chr6	157802165	158099178	ENSG00000175048	ZDHHC14	FALSE	13005889	0.818471	0.00714286
chr10	103113820	103317078	ENSG00000166167	BTRC	FALSE	32207669	0.765586	NA
chr12	70037140	70093256	ENSG00000127325	BEST3	FALSE	32180446	0.808081	0.0785714
chr8	11994677	11996586	ENSG00000223443	USP17L2	FALSE	11984677	1	0.0428571
chr11	106544738	106889250	ENSG00000152402	GUCY1A2	FALSE	28107266	0.857736	0.0928571
chr1	46252659	46501796	ENSG00000086015	MAST2	FALSE	46242659	0.803601	0.05
chr6	44240931	44346694	ENSG00000272442		FALSE	14483472	0.868668	NA
chr18	47901365	47920543	ENSG00000154839	SKA1	FALSE	29440467	0.704918	0.0214286
chr9	8314246	10612723	ENSG00000153707	PTPRD	TRUE	8304246	0.832303	0.242857
chr1	204159469	204165614	ENSG00000170498	KISS1	FALSE	45075007	0.875	0.00714286
chr14	77292715	77336645	ENSG00000100565	C14orf166B	FALSE	30002895	0.835556	0.114286
chr22	26839389	26879803	ENSG00000100099	HPS4	FALSE	10839389	0.794872	0.00714286
chr6	153308497	153323820	ENSG00000112031	MTRF1L	FALSE	17781247	0.666667	NA
chr7	75471920	75518244	ENSG00000005486	RHBDD2	FALSE	14417589	0.90873	0.00714286
chr2	74685456	74688018	ENSG00000239779	WBP1	TRUE	17638153	0.666667	NA
chr10	124913793	124924886	ENSG00000154473	BUB3	FALSE	10599861	0.818182	NA
chr6	44246480	44265458	ENSG00000146221	TCTE1	FALSE	14564708	0.909091	0.05
chr6	148593440	148873186	ENSG00000111961	SASH1	FALSE	22231881	0.809932	0.0357143
chr1	204167288	204183220	ENSG00000174567	GOLT1A	FALSE	45057401	0.857143	0.0142857
chr10	32556679	32667726	ENSG00000120616	EPC1	FALSE	6587209	0.630435	0.05
chr16	28943260	28950667	ENSG00000177455	CD19	FALSE	6385134	0.907407	0.05
chr11	63606400	63678491	ENSG00000072518	MARK2	TRUE	8962195	0.830769	0.0428571
chr3	12194551	12200851	ENSG00000157150	TIMP4	FALSE	12184551	0.793103	NA
chr2	216809213	216898819	ENSG00000118242	MREG	FALSE	26290554	0.699454	0.0142857
chr2	68405989	68483369	ENSG00000221823	PPP3R1	FALSE	23842802	0.608108	NA
chr2	27548716	27579868	ENSG00000115207	GTF3C2	FALSE	27538716	0.795181	0.0642857
chr7	140103843	140126050	ENSG00000146955	RAB19	FALSE	19002613	0.842105	0.00714286
chr20	61472467	61493115	ENSG00000101190	TCFL5	FALSE	1522405	0.73913	NA
chr17	27052915	27070473	ENSG00000160602	NEK8	FALSE	1789909	0.914286	0.0142857
chr8	12039605	12051642	ENSG00000186523	FAM86B1	FALSE	12029605	0.333333	0.00714286
chr21	34876238	34915797	ENSG00000159131	GART	FALSE	13204098	0.759494	0.0142857
chr3	40547483	40560227	ENSG00000177842	ZNF620	FALSE	40537483	0.837209	0.00714286
chr2	171847333	172087824	ENSG00000198586	TLK1	FALSE	71101549	0.790233	0.00714286
chr8	87480486	87526586	ENSG00000176623	RMDN1	FALSE	40641599	0.648936	0.00714286
chr1	149909705	149982625	ENSG00000163113	OTUD7B	FALSE	25374271	0.631206	0.0357143
chr13	27131840	27263085	ENSG00000132970	WASF3	FALSE	8131840	0.783069	0.0571429
chr14	96176304	96180533	ENSG00000100721	TCL1A	TRUE	11159007	0.907692	0.0214286
chr5	131746328	131811736	ENSG00000197536	C5orf56	FALSE	49093524	0.830688	0.0214286
chr3	156391024	156424559	ENSG00000163659	TIPARP	FALSE	41587871	0.7	0.0214286
chr5	133706870	133727683	ENSG00000119048	UBE2B	FALSE	47177577	0.625	NA
chr1	204187979	204346793	ENSG00000143850	PLEKHA6	FALSE	44893828	0.869718	0.05
chr2	29179477	29284239	ENSG00000189350	FAM179A	FALSE	29169477	0.885042	0.107143
chr1	43829068	43833696	ENSG00000066322	ELOVL1	FALSE	43819068	0.666667	0.0142857
chr4	17842822	18023499	ENSG00000178177	LCORL	FALSE	17832822	0.655172	NA
chr10	23481256	23483181	ENSG00000168267	PTF1A	FALSE	15771754	0.9	0.0285714
chr4	155525286	155534119	ENSG00000171557	FGG	FALSE	35610157	0.851351	0.0285714
chr10	23492745	23528745	ENSG00000204566	C10orf115	FALSE	15726190	0.892683	0.0285714
chr8	146015150	146017972	ENSG00000161016	RPL8	FALSE	336050	0.970588	0.00714286
chr18	48086448	48258194	ENSG00000141639	MAPK4	FALSE	29625550	0.906152	0.135714
chr2	68511303	68547183	ENSG00000119865	CNRIP1	FALSE	23778988	0.875912	0.00714286
chr19	18668572	18680197	ENSG00000105700	KXD1	FALSE	6001585	0.735294	NA
chr6	7590432	7612200	ENSG00000168566	SNRNP48	FALSE	7580432	0.693878	0.00714286
chr11	65647280	65651212	ENSG00000172543	CTSW	FALSE	11003075	1	0.0142857
chr11	616565	626078	ENSG00000099834	CDHR5	FALSE	606565	0.884615	0.00714286
chr10	23556124	23633774	ENSG00000179133	C10orf67	FALSE	15621161	0.847087	0.0214286
chr13	27329341	27334922	ENSG00000132975	GPR12	FALSE	8329341	0.88	0.0357143
chr3	40566369	40616176	ENSG00000172888	ZNF621	FALSE	40556369	0.861751	0.05
chr7	140152840	140179369	ENSG00000133606	MKRN1	FALSE	18949294	0.80303	0.0357143
chr17	34323476	34329084	ENSG00000267596	CCL15	FALSE	9060470	0.8	0.00714286
chr5	141000443	141016437	ENSG00000171720	HDAC3	FALSE	39888823	0.744186	0.0214286
chr11	107197071	107328572	ENSG00000152404	CWF19L2	FALSE	27667944	0.785211	NA
chr10	70847862	70864567	ENSG00000122862	SRGN	FALSE	28592927	0.764706	NA
chr2	109335937	109402267	ENSG00000153201	RANBP2	TRUE	14009766	0.756098	0.0785714
chr12	29302036	29493913	ENSG00000064763	FAR2	FALSE	5362781	0.700535	0.0142857
chr12	56631591	56652175	ENSG00000139645	ANKRD52	FALSE	18774897	0.942308	0.0357143
chr2	120187477	120196096	ENSG00000171227	TMEM37	FALSE	24861306	0.903846	0.0285714
chr13	27640293	27746033	ENSG00000152484	USP12	FALSE	8640293	0.669528	NA
chr6	139094657	139114456	ENSG00000024862	CCDC28A	FALSE	31990611	0.863636	0.05
chr3	113251143	113348425	ENSG00000072858	SIDT1	FALSE	19746289	0.863918	0.0714286
chr19	41768401	41813503	ENSG00000105323	HNRNPUL1	FALSE	14086619	0.839695	0.0357143
chr4	146402346	146479231	ENSG00000170365	SMAD1	FALSE	44665045	0.745283	0.0214286
chr2	120197419	120282070	ENSG00000080293	SCTR	FALSE	24871248	0.87574	0.0428571
chr12	121440225	121454305	ENSG00000157895	C12orf43	FALSE	12387590	0.897959	0.00714286
chr17	40688190	40696467	ENSG00000108784	NAGLU	FALSE	15425184	0.764706	0.0142857
chr6	143759575	143764295	ENSG00000268402		FALSE	27340772	0.8	NA
chr5	68485375	68506184	ENSG00000153044	CENPH	FALSE	19079734	0.769231	NA
chr12	128751948	129192460	ENSG00000181234	TMEM132C	FALSE	4649435	0.884847	0.25
chr6	39867354	39902290	ENSG00000124615	MOCS1	FALSE	18927876	0.88	NA
chr15	42120283	42129779	ENSG00000243789	JMJD7	FALSE	22120283	0.956522	0.00714286
chr12	66582659	66648402	ENSG00000090376	IRAK3	FALSE	28725965	0.826855	0.0357143
chr3	12328867	12475855	ENSG00000132170	PPARG	TRUE	12318867	0.864776	0.0428571
chr5	133737778	133747589	ENSG00000237190	CDKN2AIPNL	FALSE	47157671	0.833333	NA
chr1	204372515	204380919	ENSG00000158615	PPP1R15B	FALSE	44859702	0.666667	0.0142857
chr20	61509090	61569304	ENSG00000101191	DIDO1	FALSE	1446216	0.806452	0.1
chr16	318726	333003	ENSG00000242173	ARHGDIG	FALSE	308726	0.861538	0.00714286
chr2	26395960	26412532	ENSG00000157833	GAREML	FALSE	26385960	0.893939	0.0214286
chr2	68592305	68624585	ENSG00000115956	PLEK	FALSE	23701586	0.858779	0.0142857
chr6	143771944	143811147	ENSG00000034693	PEX3	FALSE	27293920	0.777778	0.0142857
chr19	46990163	46999755	ENSG00000204851	PNMAL2	FALSE	12119228	0.875	0.0285714
chr16	28962128	28978418	ENSG00000176953	NFATC2IP	FALSE	6357383	0.79661	0.0214286
chr19	46997765	46999755	ENSG00000204850		FALSE	12119228	1	0.00714286
chr2	62095224	62115939	ENSG00000115484	CCT4	FALSE	30210232	0.736842	0.00714286
chr19	47050313	47104118	ENSG00000268423		FALSE	12014865	0.797872	0.0142857
chr7	150497491	150502208	ENSG00000002933	TMEM176A	FALSE	8626455	0.958333	0.0571429
chr11	65651212	65656010	ENSG00000172500	FIBP	FALSE	11007007	0.8	0.00714286
chr1	40915774	40929390	ENSG00000187801	ZFP69B	FALSE	40905774	0.819672	0.0142857
chr2	95963052	96051825	ENSG00000115041	KCNIP3	FALSE	636881	0.868571	0.0142857
chr14	31363005	31495607	ENSG00000196792	STRN3	FALSE	12363005	0.782946	0.0142857
chr6	139117063	139225207	ENSG00000203734	ECT2L	TRUE	31879860	0.862288	0.0357143
chr7	99302660	99332819	ENSG00000160870	CYP3A7	FALSE	38248329	0.895238	0.0857143
chr17	47035916	47045958	ENSG00000159224	GIP	FALSE	21772910	0.948718	0.0357143
chr5	68513587	68525956	ENSG00000134056	MRPS36	FALSE	19107946	0.714286	0.00714286
chr19	47104331	47114050	ENSG00000160014	CALM3	FALSE	12004933	0.730769	0.00714286
chr12	101869199	101880775	ENSG00000166211	SPIC	FALSE	31961120	0.851852	0.0428571
chr5	133860003	133918918	ENSG00000043143	JADE2	FALSE	46986342	0.870229	0.0142857
chr17	34340096	34345005	ENSG00000167236	CCL23	FALSE	9077090	0.789474	0.0142857
chr1	204391756	204463852	ENSG00000133056	PIK3C2B	FALSE	44776769	0.84	0.0928571
chr7	75528518	75616173	ENSG00000127948	POR	FALSE	14474187	0.851449	0.0428571
chr10	90750414	90775542	ENSG00000026103	FAS	TRUE	44749205	0.833333	0.0142857
chr15	65440557	65477680	ENSG00000166855	CLPX	FALSE	37043712	0.826087	0.0214286
chr6	26440700	26453643	ENSG00000111801	BTN3A3	FALSE	26430700	0.693878	0.0214286
chr17	26662628	26674035	ENSG00000109079	TNFAIP1	FALSE	1399622	0.875	0.00714286
chr3	171509580	171527714	ENSG00000183657		FALSE	26484716	0.794118	NA
chr6	44267391	44281063	ENSG00000124608	AARS2	FALSE	14549103	0.886792	0.0571429
chr5	96496571	96518964	ENSG00000058729	RIOK2	FALSE	47090930	0.732143	0.0357143
chr16	333152	337215	ENSG00000185615	PDIA2	FALSE	323152	1	0.00714286
chr3	171561139	171656505	ENSG00000186329	TMEM212	FALSE	26355925	0.870301	0.0285714
chr1	40942887	40962015	ENSG00000187815	ZFP69	FALSE	40932887	0.655172	0.0142857
chr2	74688184	74692537	ENSG00000115275	MOGS	FALSE	17633634	0.727273	0.0285714
chr5	68530668	68573250	ENSG00000134058	CDK7	FALSE	19125027	0.783784	0.00714286
chr12	82617460	82752584	ENSG00000133773	CCDC59	FALSE	44760766	0.81289	0.0142857
chr6	158244296	158366109	ENSG00000130340	SNX9	FALSE	12738958	0.759563	0.00714286
chr17	65821640	65980494	ENSG00000171634	BPTF	FALSE	40558634	0.762346	0.0642857
chr4	144106070	144144983	ENSG00000170185	USP38	FALSE	46999293	0.720588	0.0142857
chr6	43395104	43418168	ENSG00000124574	ABCC10	FALSE	15411998	0.9125	0.0428571
chr18	48324574	48351772	ENSG00000134042	MRO	FALSE	29715476	0.827225	0.0714286
chr13	27825446	27830828	ENSG00000122026	RPL21	TRUE	8825446	0.5	0.00714286
chr4	20254883	20622184	ENSG00000145147	SLIT2	FALSE	20244883	0.832061	0.214286
chr14	77490888	77495034	ENSG00000119669	IRF2BPL	FALSE	29844506	0.75	0.0142857
chr17	48348767	48358844	ENSG00000167105	TMEM92	FALSE	23085761	0.920635	0.00714286
chr12	76419227	76427712	ENSG00000139289	PHLDA1	FALSE	38562533	0.45	0.0142857
chr22	26879843	26890624	ENSG00000100104	SRRD	FALSE	10879843	0.909091	NA
chr6	153325594	153452384	ENSG00000091844	RGS17	FALSE	17652683	0.786585	0.0142857
chr14	77564440	77583630	ENSG00000198894	CIPC	FALSE	29755910	0.788462	0.00714286
chr17	67410839	67539472	ENSG00000108984	MAP2K6	FALSE	42147833	0.774793	0.05
chr6	151186685	151423023	ENSG00000120254	MTHFD1L	FALSE	19682044	0.781321	0.0285714
chr1	43849588	43855479	ENSG00000159479	MED8	FALSE	43839588	0.733333	0.00714286
chr12	121458095	121477045	ENSG00000135114	OASL	FALSE	12364850	0.851485	0.0714286
chr15	52839242	52862080	ENSG00000128989	ARPP19	FALSE	32839242	0.707317	NA
chr4	164031225	164088073	ENSG00000145414	NAF1	FALSE	27056203	0.706667	0.00714286
chr12	57316938	57328189	ENSG00000170426	SDR9C7	FALSE	19460244	0.90411	0.0142857
chr2	26413504	26467594	ENSG00000084754	HADHA	FALSE	26403504	0.747368	0.00714286
chr3	156543270	156763918	ENSG00000197980	LEKR1	FALSE	41248512	0.823241	0.0428571
chr1	40974413	40982228	ENSG00000164002	EXO5	FALSE	40964413	0.6875	0.00714286
chr16	67862060	67881714	ENSG00000102901	CENPT	FALSE	22463039	0.830189	0.00714286
chr1	46505812	46642160	ENSG00000117461	PIK3R3	FALSE	46495812	0.796339	0.0285714
chr16	28985542	28995869	ENSG00000169682	SPNS1	FALSE	6339932	0.904762	0.0642857
chr12	57345219	57353158	ENSG00000139547	RDH16	FALSE	19488525	0.964912	0.00714286
chr6	36683256	36699870	ENSG00000255587	RAB44	FALSE	22130296	0.925926	NA
chr1	45100910	45140227	ENSG00000126106	TMEM53	FALSE	45090910	0.8375	0.0142857
chr17	45900638	45908900	ENSG00000159111	MRPL10	FALSE	20637632	0.870968	0.0142857
chr17	19674142	19771249	ENSG00000083290	ULK2	FALSE	2491757	0.774892	0.0285714
chr19	47123725	47128375	ENSG00000160013	PTGIR	FALSE	11990608	0.892857	0.0428571
chr18	21269407	21535030	ENSG00000053747	LAMA3	FALSE	2808509	0.878445	0.214286
chr2	29283842	29297127	ENSG00000179270	C2orf71	FALSE	29273842	0.905405	0.1
chr10	37890366	37891859	ENSG00000256892	MTRNR2L7	FALSE	1363076	0.888889	0.00714286
chr15	65488337	65503826	ENSG00000138615	CILP	FALSE	37017566	0.902439	0.0857143
chr6	36708552	36807778	ENSG00000124772	CPNE5	FALSE	22022388	0.903421	0.0214286
chr6	153552455	153668623	ENSG00000213121		FALSE	17436444	0.801762	0.0285714
chr20	44994688	45061704	ENSG00000062598	ELMO2	FALSE	15625119	0.823276	0.0142857
chr6	149068464	149398126	ENSG00000111962	UST	FALSE	21706941	0.811224	0.00714286
chr19	47137333	47137942	ENSG00000167414	GNG8	FALSE	11981041	1	NA
chr4	108745719	108836203	ENSG00000164023	SGMS2	FALSE	56085602	0.79918	0.0214286
chr10	38091751	38147034	ENSG00000198105	ZNF248	FALSE	1107901	0.809524	0.05
chr7	99354604	99381888	ENSG00000160868	CYP3A4	FALSE	38300273	0.875536	0.1
chr13	27844464	27847827	ENSG00000122035	RASL11A	FALSE	8844464	0.875	0.0142857
chr17	7829249	7833940	ENSG00000262730		FALSE	14429066	0.736842	NA
chr4	164245113	164265984	ENSG00000164128	NPY1R	FALSE	26878292	0.837209	0.0642857
chr19	40697651	40721482	ENSG00000130758	MAP3K10	FALSE	13015869	0.819444	0.0357143
chr10	70883268	70932617	ENSG00000122958	VPS26A	FALSE	28628333	0.766234	0.00714286
chr2	74699085	74700449	ENSG00000204822	MRPL53	FALSE	17625722	1	0.00714286
chr19	47150869	47164395	ENSG00000197380	DACT3	FALSE	11954588	0.868421	NA
chr2	216861052	216947678	ENSG00000115425	PECR	FALSE	26241695	0.768421	0.0142857
chr17	7833663	7835441	ENSG00000170043	TRAPPC1	FALSE	14427565	0.9	NA
chr22	26887191	26908471	ENSG00000100109	TFIP11	FALSE	10887191	0.694444	0.0142857
chr5	131817301	131826490	ENSG00000125347	IRF1	TRUE	49078770	0.818182	0.0285714
chr2	264140	278283	ENSG00000143727	ACP1	FALSE	254140	0.580645	0.00714286
chr2	21346789	21366144	ENSG00000218819	TDRD15	FALSE	21336789	0.887097	0.2
chr17	79202077	79212891	ENSG00000167302	ENTHD2	FALSE	53939071	0.92	0.0642857
chr6	136663875	136871957	ENSG00000135525	MAP7	FALSE	34233110	0.850459	0.0714286
chr5	154320630	154348971	ENSG00000082515	MRPL22	FALSE	26556289	0.711864	NA
chr1	22303514	22325135	ENSG00000219073	CELA3B	FALSE	22293514	0.876404	0.0285714
chr1	150039369	150117505	ENSG00000136631	VPS45	FALSE	25503935	0.792553	0.0142857
chr20	61569471	61576996	ENSG00000101193	GID8	FALSE	1438524	0.9375	0.00714286
chr5	79945819	79946855	ENSG00000271043	MTRNR2L2	FALSE	30540178	0.5	NA
chr8	87497059	87573726	ENSG00000085719	CPNE3	FALSE	40658172	0.651282	0.0214286
chr16	337440	402673	ENSG00000103126	AXIN1	TRUE	327440	0.861878	0.0785714
chr15	65526798	65592956	ENSG00000138617	PARP16	FALSE	36928436	0.870813	0.0214286
chr13	27998681	28009958	ENSG00000122034	GTF3A	FALSE	8998681	0.5	0.00714286
chr11	3108346	3187969	ENSG00000021762	OSBPL5	FALSE	3098346	0.865546	0.0357143
chr2	23608088	23931481	ENSG00000119771	KLHL29	FALSE	23598088	0.830654	0.05
chr14	96505661	96560417	ENSG00000227051	C14orf132	FALSE	10779123	0.85124	0.0142857
chr9	130455257	130487152	ENSG00000187024	PTRH1	FALSE	10716279	0.842105	0.00714286
chr2	68686551	68694390	ENSG00000204923	FBXO48	FALSE	23631781	0.821429	0.00714286
chr4	164265091	164273086	ENSG00000164129	NPY5R	FALSE	26871190	0.790123	0.0642857
chr4	108852525	108874613	ENSG00000155016	CYP2U1	FALSE	56192408	0.545455	NA
chr3	135684515	135866733	ENSG00000073711	PPP2R3A	FALSE	42179661	0.713555	0.05
chr5	79950467	80172279	ENSG00000113318	MSH3	TRUE	30544826	0.751838	0.0357143
chr15	42120293	42140353	ENSG00000168970	JMJD7-PLA2G4B	FALSE	22120293	0.888889	0.0357143
chr1	40997233	41013841	ENSG00000117010	ZNF684	FALSE	40987233	0.928571	0.0428571
chr6	13358062	13487894	ENSG00000145990	GFOD1	FALSE	13348062	0.823651	NA
chr1	22328149	22339032	ENSG00000142789	CELA3A	FALSE	22318149	0.842105	0.0142857
chr4	164392257	164395047	ENSG00000151005	TKTL2	FALSE	26749229	0.846154	0.128571
chr10	129894923	129924649	ENSG00000148773	MKI67	FALSE	5600098	0.786667	0.114286
chr6	154331631	154568001	ENSG00000112038	OPRM1	FALSE	16537066	0.852528	0.1
chr11	64556290	64570713	ENSG00000168067	MAP4K2	FALSE	9912085	0.9375	0.0214286
chr2	29320571	29412509	ENSG00000115295	CLIP4	FALSE	29310571	0.813953	0.0214286
chr20	61584052	61599949	ENSG00000101194	SLC17A9	FALSE	1415571	0.866667	0.0285714
chr5	92919043	92930321	ENSG00000175745	NR2F1	FALSE	43513402	0.772727	0.0214286
chr1	46640745	46651630	ENSG00000117472	TSPAN1	FALSE	46630745	0.897436	0.0142857
chr17	47074774	47133012	ENSG00000159217	IGF2BP1	FALSE	21811768	0.854962	0.107143
chr2	72356367	72375167	ENSG00000003137	CYP26B1	FALSE	19951004	0.851351	0.0142857
chr11	65657875	65659105	ENSG00000175602	CCDC85B	FALSE	11013670	1	NA
chr3	41236328	41301587	ENSG00000168036	CTNNB1	TRUE	41226328	0.670968	0.0714286
chr4	164415594	164441691	ENSG00000198498	TMA16	FALSE	26702585	0.75	0.00714286
chr5	33944721	33984835	ENSG00000164175	SLC45A2	FALSE	12420806	0.7625	NA
chr8	12168471	12175825	ENSG00000232948	DEFB130	FALSE	12158471	0.666667	NA
chr15	52873514	53002014	ENSG00000047346	FAM214A	FALSE	32873514	0.832487	0.05
chr14	20811741	20826064	ENSG00000129484	PARP2	FALSE	1811741	0.846154	0.0142857
chr5	133936834	133984961	ENSG00000152700	SAR1B	FALSE	46920299	0.843137	NA
chr11	65659520	65668044	ENSG00000175592	FOSL1	FALSE	11015315	1	0.00714286
chr1	43855553	43918321	ENSG00000198198	SZT2	FALSE	43845553	0.850299	0.107143
chr19	40721965	40724306	ENSG00000174521	TTC9B	FALSE	13040183	1	NA
chr15	65619465	65670378	ENSG00000174498	IGDCC3	FALSE	36851014	0.852041	0.05
chr12	129277739	129308528	ENSG00000139370	SLC15A4	FALSE	4533367	0.78125	0.0357143
chr5	98104354	98134347	ENSG00000174136	RGMB	FALSE	48698713	0.863636	0.00714286
chr5	154393260	154397685	ENSG00000226650	KIF4B	FALSE	26507575	0.849057	0.135714
chr12	49962001	50038449	ENSG00000110844	PRPF40B	TRUE	12105307	0.791411	0.0214286
chr19	47177532	47220384	ENSG00000105287	PRKD2	TRUE	11898599	0.896226	0.0214286
chr14	77564654	77691805	ENSG00000259164		FALSE	29647735	0.877717	NA
chr8	12282913	12293915	ENSG00000145002	FAM86B2	TRUE	12272913	1	NA
chr4	144257915	144395721	ENSG00000109458	GAB1	FALSE	46748555	0.709402	0.0285714
chr10	23728198	23731308	ENSG00000165312	OTUD1	FALSE	15523627	0.25	0.00714286
chr4	151503077	151505843	ENSG00000181541	MAB21L2	FALSE	39638433	1	0.0285714
chr1	45140364	45191263	ENSG00000198520	C1orf228	FALSE	45130364	0.928205	0.0214286
chr17	34391640	34399392	ENSG00000006074	CCL18	FALSE	9128634	0.947368	NA
chr4	146539415	146581187	ENSG00000151611	MMAA	FALSE	44563089	0.813953	0.00714286
chr2	120302008	120419827	ENSG00000163075		FALSE	24975837	0.866797	0.1
chr1	22379120	22419437	ENSG00000070831	CDC42	FALSE	22369120	0.780488	NA
chr4	108910870	108956331	ENSG00000138796	HADH	FALSE	56250753	0.894118	0.0285714
chr9	130469268	130478281	ENSG00000160401	C9orf117	FALSE	10725150	0.814815	0.0214286
chr14	77582911	77725838	ENSG00000165548	TMEM63C	FALSE	29613702	0.901587	0.0428571
chr5	155297354	156194799	ENSG00000170624	SGCD	FALSE	24710461	0.767198	0.00714286
chr1	204485511	204542871	ENSG00000198625	MDM4	TRUE	44697750	0.78	0.00714286
chr10	121588972	121652068	ENSG00000197771	MCMBP	FALSE	13872679	0.821429	0.0214286
chr10	28339922	28623415	ENSG00000150054	MPP7	FALSE	10631520	0.869565	0.0714286
chr9	12685439	12710290	ENSG00000107165	TYRP1	FALSE	12675439	0.647059	0.00714286
chr17	33333009	33416338	ENSG00000092871	RFFL	FALSE	8070003	0.753927	NA
chr19	40728115	40732597	ENSG00000105219	CNTD2	FALSE	13046333	0.869565	0.0285714
chr6	7727030	7881655	ENSG00000153162	BMP6	FALSE	7717030	0.865306	0.0214286
chr1	41086351	41131329	ENSG00000117016	RIMS3	FALSE	41076351	0.880658	0.05
chr15	42140345	42186275	ENSG00000137877	SPTBN5	FALSE	22140345	0.908571	0.128571
chr10	88414314	88426605	ENSG00000122375	OPN4	FALSE	46159379	0.870968	0.0428571
chr4	152020725	152025804	ENSG00000145425	RPS3A	TRUE	39118472	1	0.00714286
chr11	65684279	65686588	ENSG00000175573	C11orf68	FALSE	11040074	1	NA
chr10	103330317	103369425	ENSG00000166171	DPCD	FALSE	32155322	0.883721	0.0571429
chr6	139224630	139309398	ENSG00000135597	REPS1	FALSE	31795669	0.75625	0.0142857
chr17	48423453	48440499	ENSG00000015532	XYLT2	TRUE	23160447	0.777778	0.0214286
chr6	149539777	149732749	ENSG00000055208	TAB2	FALSE	21372318	0.808264	0.0285714
chr20	3801178	3805949	ENSG00000125843	AP5S1	FALSE	3791178	0.8	NA
chr9	130478345	130493879	ENSG00000167094	TTC16	FALSE	10709552	0.866667	0.0214286
chr22	18270415	18507325	ENSG00000243156	MICAL3	FALSE	2270415	0.808411	0.157143
chr19	55385704	55401838	ENSG00000186431	FCAR	FALSE	3717145	0.909091	0.0928571
chr4	164445450	165305202	ENSG00000145416	2021-03-01	FALSE	25839074	0.841082	0.142857
chr6	36822603	36842800	ENSG00000137168	PPIL1	FALSE	21987366	0.795455	0.0142857
chr16	417384	420527	ENSG00000086504	MRPL28	FALSE	407384	0.9	0.0142857
chr6	143815948	143832827	ENSG00000001036	FUCA2	FALSE	27272240	0.666667	0.00714286
chr17	34415602	34417515	ENSG00000006075	CCL3	FALSE	9152596	1	NA
chr11	65686728	65689032	ENSG00000175550	DRAP1	FALSE	11042523	0.857143	0.0142857
chr13	28009776	28024739	ENSG00000122033	MTIF3	FALSE	9009776	0.733333	NA
chr12	113494514	113535833	ENSG00000135144	DTX1	TRUE	20306062	0.928251	0.0285714
chr2	202899310	202903160	ENSG00000155760	FZD7	FALSE	40286213	0.6875	NA
chr20	61637331	61638387	ENSG00000125533	BHLHE23	FALSE	1377133	1	NA
chr10	75669727	75682535	ENSG00000222047	C10orf55	FALSE	33414792	0.910714	0.00714286
chr21	34914924	34949812	ENSG00000159140	SON	TRUE	13170083	0.672131	0.0857143
chr5	110559351	110830584	ENSG00000152495	CAMK4	FALSE	61153710	0.836321	0.0285714
chr10	70939988	70968855	ENSG00000156502	SUPV3L1	FALSE	28685053	0.833333	0.00714286
chr20	61826781	61847586	ENSG00000149658	YTHDF1	FALSE	1167934	0.648148	0.0214286
chr15	65673802	65715410	ENSG00000103742	IGDCC4	FALSE	36805982	0.907407	0.0428571
chr6	43418090	43424370	ENSG00000171462	DLK2	FALSE	15405796	0.875	0.0428571
chr20	57556263	57570188	ENSG00000101158	NELFCD	FALSE	5445332	0.85	0.0142857
chr10	23983675	24836772	ENSG00000120549	KIAA1217	FALSE	14418163	0.876171	0.25
chr2	202937978	203062585	ENSG00000182329		FALSE	40126788	0.872152	0.121429
chr19	7828035	7834491	ENSG00000104938	CLEC4M	FALSE	7818035	0.901408	0.0142857
chr6	7881483	8026646	ENSG00000239264	TXNDC5	FALSE	7871483	0.83	0.00714286
chr2	226265364	226518734	ENSG00000144460	NYAP2	FALSE	16670639	0.875186	0.178571
chr12	57388230	57390468	ENSG00000166856	GPR182	FALSE	19531536	0.909091	0.0285714
chr1	46654354	46685977	ENSG00000085998	POMGNT1	FALSE	46644354	0.859375	0.00714286
chr9	12775020	12822130	ENSG00000153714	LURAP1L	FALSE	12765020	0.765625	0.00714286
chr5	98190908	98262240	ENSG00000153922	CHD1	FALSE	48785267	0.685714	0.0428571
chr11	107373452	107436472	ENSG00000137760	ALKBH8	FALSE	27560044	0.757962	0.0357143
chr3	139654027	140296239	ENSG00000158258	CLSTN2	FALSE	46149173	0.86423	0.164286
chr20	61867235	61871859	ENSG00000101197	BIRC7	FALSE	1143661	1	0.00714286
chr13	28120050	28194541	ENSG00000139517	LNX2	FALSE	9120050	0.77305	0.0357143
chr2	227596033	227664475	ENSG00000169047	IRS1	FALSE	15524898	0.728682	0.0571429
chr6	31654739	31681849	ENSG00000204422		FALSE	27148317	0.854701	0.00714286
chr12	29490285	29534122	ENSG00000087502	ERGIC2	FALSE	5322572	0.594595	NA
chr4	128838960	128887150	ENSG00000164073	MFSD8	FALSE	62257126	0.727273	0.00714286
chr6	74303102	74363878	ENSG00000119899	SLC17A5	FALSE	12472936	0.732026	0.0142857
chr6	13469513	13486415	ENSG00000187461		FALSE	13459513	0.826087	NA
chr4	146601356	146692184	ENSG00000237136	C4orf51	FALSE	44452092	0.859396	0.0214286
chr8	142217265	142318404	ENSG00000022567	SLC45A4	FALSE	4035618	0.8739	0.0785714
chr8	12579403	12613582	ENSG00000154359	LONRF1	FALSE	12569403	0.75	0.0357143
chr10	88428206	88495825	ENSG00000122367	LDB3	FALSE	46173271	0.902597	0.0357143
chr6	31674640	31685581	ENSG00000204424	LY6G6F	FALSE	27144585	0.891892	0.0357143
chr3	129158968	129239198	ENSG00000163913	IFT122	FALSE	35654114	0.874494	0.0142857
chr16	420773	437113	ENSG00000129925	TMEM8A	FALSE	410773	0.857143	0.0428571
chr11	63678693	63684316	ENSG00000167771	RCOR2	FALSE	9034488	0.933333	0.0285714
chr3	131252399	132004254	ENSG00000196353	CPNE4	FALSE	37747545	0.8729	0.1
chr12	66696325	66737423	ENSG00000127311	HELB	FALSE	28839631	0.715596	0.05
chr22	26921458	26992681	ENSG00000128294	TPST2	FALSE	10921458	0.832579	0.0214286
chr2	227700297	227863931	ENSG00000144468	RHBDD1	FALSE	15325442	0.812183	0.0142857
chr6	158402888	158520208	ENSG00000078269	SYNJ2	FALSE	12584859	0.896465	0.0785714
chr13	28194903	28241548	ENSG00000186184	POLR1D	FALSE	9194903	0.710843	0.00714286
chr6	13574816	13614790	ENSG00000124523	SIRT5	FALSE	13564816	0.788991	0.00714286
chr9	130493803	130497604	ENSG00000160404	TOR2A	FALSE	10705827	0.875	0.0214286
chr11	94695787	94706776	ENSG00000150316	CWC15	FALSE	40051582	0.684211	NA
chr20	3827487	3849280	ENSG00000088888	MAVS	FALSE	3817487	0.913043	0.0214286
chr18	48405419	48474691	ENSG00000082212	ME2	FALSE	29592557	0.728155	0.0285714
chr12	76438670	76478813	ENSG00000187109	NAP1L1	FALSE	38581976	0.670886	0.00714286
chr12	118470712	118500235	ENSG00000176871	WSB2	FALSE	15341660	0.692308	0.0214286
chr14	96671016	96710666	ENSG00000168398	BDKRB2	FALSE	10628874	0.886486	0.0571429
chr1	204586298	204654861	ENSG00000170382	LRRN2	FALSE	44585760	0.881104	0.0714286
chr3	238279	451090	ENSG00000134121	CHL1	FALSE	228279	0.83205	0.178571
chr15	53049637	53083273	ENSG00000169856	ONECUT1	FALSE	33049637	0.865922	0.0142857
chr7	1878222	1889567	ENSG00000176349		FALSE	1868222	0.809524	0.00714286
chr20	61872136	61904046	ENSG00000101198	NKAIN4	FALSE	1111474	0.921348	0.0285714
chr2	197669726	197675000	ENSG00000187944	C2orf66	FALSE	45514373	0.84	0.00714286
chr5	92953775	93447404	ENSG00000113391	FAM172A	FALSE	43548134	0.733753	0.00714286
chr13	28366780	28368905	ENSG00000169840	GSX1	FALSE	9366780	0.666667	NA
chr2	68694693	68858004	ENSG00000169621	APLF	FALSE	23468167	0.790123	0.0214286
chr5	37812779	37839788	ENSG00000168621	GDNF	FALSE	8565853	0.83125	0.0142857
chr12	82752276	82873015	ENSG00000127720	METTL25	FALSE	44895582	0.792952	0.0428571
chr19	40736224	40791443	ENSG00000105221	AKT2	TRUE	13054442	0.86014	0.0428571
chr13	28494157	28500368	ENSG00000139515	PDX1	FALSE	9494157	0.861111	0.00714286
chr7	2273866	2281840	ENSG00000122687	FTSJ2	FALSE	2263866	0.444444	NA
chr6	44310397	44344904	ENSG00000249481	SPATS1	FALSE	14485262	0.862275	0.0214286
chr3	50126341	50156454	ENSG00000003756	RBM5	FALSE	40348400	0.771429	0.0285714
chr2	187350883	187374090	ENSG00000065548	ZC3H15	FALSE	55815283	0.6875	0.0214286
chr4	146678779	146859787	ENSG00000151612	ZNF827	FALSE	44284489	0.834731	0.1
chr12	113536624	113574044	ENSG00000111344	RASAL1	FALSE	20267851	0.889313	0.0571429
chr13	28519343	28519727	ENSG00000180389	ATP5EP2	FALSE	9519343	1	NA
chr12	57390745	57391335	ENSG00000268162		FALSE	19534051	NA	NA
chr12	57392618	57400230	ENSG00000166860	ZBTB39	FALSE	19535924	0.85	0.0357143
chr22	26995242	27014052	ENSG00000100122	CRYBB1	FALSE	10995242	0.927083	0.0357143
chr7	143050493	143059863	ENSG00000159784	FAM131B	TRUE	16068800	0.91358	0.0357143
chr2	113973574	114036527	ENSG00000125618	PAX8	TRUE	18647403	0.868664	0.05
chr13	28536274	28545276	ENSG00000165556	CDX2	TRUE	9536274	1	0.0142857
chr11	65729160	65747299	ENSG00000175467	SART1	FALSE	11084955	0.741935	NA
chr1	41157320	41237275	ENSG00000066136	NFYC	FALSE	41147320	0.781818	0.0142857
chr14	31494312	31562818	ENSG00000100478	AP4S1	FALSE	12494312	0.767857	0.00714286
chr4	155548097	155674270	ENSG00000121207	LRAT	FALSE	35470006	0.804721	0.00714286
chr2	216946589	216967506	ENSG00000163449	TMEM169	FALSE	26221867	0.883721	0.0357143
chr13	28551851	28562791	ENSG00000183463	URAD	FALSE	9551851	0.790323	0.0142857
chr15	53805938	54055075	ENSG00000166415	WDR72	FALSE	33805938	0.849832	0.0928571
chr1	22443798	22470462	ENSG00000162552	WNT4	FALSE	22433798	0.864407	NA
chr19	55417508	55427508	ENSG00000189430	NCR1	FALSE	3691475	0.916667	0.05
chr12	70132461	70216984	ENSG00000127328	RAB3IP	FALSE	32275767	0.868613	0.1
chr10	75757872	75879918	ENSG00000035403	VCL	FALSE	33502937	0.828704	0.0285714
chr22	27017928	27026636	ENSG00000196431	CRYBA4	FALSE	11017928	0.85	0.0142857
chr2	197697728	197792520	ENSG00000197121	PGAP1	FALSE	45396853	0.774011	0.0428571
chr11	1490687	1522477	ENSG00000182208	MOB2	FALSE	1480687	0.919192	0.00714286
chr7	2281857	2290781	ENSG00000106268	NUDT1	FALSE	2271857	0.75	NA
chr11	9595228	9615004	ENSG00000166483	WEE1	FALSE	9585228	0.707317	0.0214286
chr10	115939029	115992063	ENSG00000095627	TDRD1	FALSE	19532684	0.830303	0.0928571
chr11	63706431	63724800	ENSG00000110583	NAA40	FALSE	9062226	0.914286	NA
chr10	103338639	103348027	ENSG00000166169	POLL	FALSE	32176720	0.964286	0.0285714
chr5	156346293	156390266	ENSG00000145850	TIMD4	FALSE	24514994	0.878151	0.0857143
chr12	57403784	57422667	ENSG00000166863	TAC3	FALSE	19547090	0.915385	0.0285714
chr18	48494361	48514491	ENSG00000141642	ELAC1	FALSE	29552757	0.772727	0.0214286
chr12	129337972	129469509	ENSG00000151948	GLT1D1	FALSE	4372386	0.850394	0.0785714
chr3	63213991	63602597	ENSG00000163630	SYNPR	FALSE	26902257	0.847259	0.00714286
chr17	7835419	7853236	ENSG00000170037	CNTROB	FALSE	14409770	0.9	0.0714286
chr13	28577411	28674729	ENSG00000122025	FLT3	TRUE	9577411	0.847125	0.121429
chr17	73622925	73663269	ENSG00000108469	RECQL5	TRUE	48359919	0.83	0.0357143
chr2	201754050	201768655	ENSG00000196290	NIF3L1	FALSE	41420718	0.807692	0.00714286
chr1	22778344	22857650	ENSG00000184677	ZBTB40	FALSE	22768344	0.784232	0.05
chr7	37723399	37873390	ENSG00000187037	GPR141	FALSE	20180941	0.845534	0.0357143
chr22	28144265	28197486	ENSG00000169184	MN1	TRUE	12144265	0.863905	0.0642857
chr4	155702365	155749965	ENSG00000151962	RBM46	FALSE	35394311	0.819767	0.0857143
chr2	72403113	73053170	ENSG00000144036	EXOC6B	FALSE	19273001	0.765393	0.00714286
chr19	41807492	41859816	ENSG00000105329	TGFB1	FALSE	14125710	0.859873	0.0357143
chr2	216972187	217071026	ENSG00000079246	XRCC5	FALSE	26118347	0.727749	0.0142857
chr19	18682540	18688360	ENSG00000221983	UBA52	FALSE	5993422	0.8125	NA
chr16	446725	460367	ENSG00000103202	NME4	FALSE	436725	0.851852	0.00714286
chr1	45205490	45233439	ENSG00000142945	KIF2C	FALSE	45195490	0.833333	0.0214286
chr15	42190950	42264776	ENSG00000103966	EHD4	FALSE	22190950	0.753968	0.0214286
chr7	37723446	37991543	ENSG00000086289	EPDR1	FALSE	20062788	0.839667	0.0142857
chr4	152023903	152246784	ENSG00000109686	SH3D19	FALSE	38897492	0.740741	0.0285714
chr3	156864297	156878549	ENSG00000163660	CCNL1	FALSE	41133881	0.62069	0.0142857
chr10	80828792	81076276	ENSG00000108175	ZMIZ1	FALSE	38573857	0.854962	0.0642857
chr22	28247657	28316122	ENSG00000180957	PITPNB	FALSE	12247657	0.714286	0.00714286
chr12	56660642	56664750	ENSG00000135469	COQ10A	FALSE	18803948	1	NA
chr9	130500596	130541020	ENSG00000095370	SH2D3C	FALSE	10662411	0.939227	0.05
chr17	37617764	37721160	ENSG00000167258	CDK12	TRUE	12354758	0.819672	0.0428571
chr5	156456424	156486130	ENSG00000113249	HAVCR1	FALSE	24419130	0.876972	0.0571429
chr20	61904137	61921142	ENSG00000101199	ARFGAP1	FALSE	1094378	0.820513	0.0142857
chr8	142264664	142266916	ENSG00000254019		FALSE	4087106	0.785714	0.0142857
chr10	131265448	131566271	ENSG00000170430	MGMT	TRUE	3958476	0.813774	NA
chr5	33986283	34008220	ENSG00000242110	AMACR	FALSE	12397421	0.72549	0.0214286
chr8	87566205	87755903	ENSG00000170289	CNGB3	FALSE	40727318	0.868153	0.185714
chr18	48494389	48584514	ENSG00000267699		FALSE	29482734	0.721925	0.0214286
chr8	142366600	142377367	ENSG00000204882	GPR20	FALSE	3976655	0.962963	0.0571429
chr4	156129781	156138230	ENSG00000185149	NPY2R	FALSE	35006046	0.867769	0.0428571
chr19	41816094	41830788	ENSG00000142039	CCDC97	FALSE	14134312	0.821429	0.00714286
chr7	37888199	37940003	ENSG00000086288	NME8	FALSE	20114328	0.85	0.121429
chr4	165875598	165898820	ENSG00000183439	TRIM61	FALSE	25245456	0.88806	0.0142857
chr17	45908993	45915079	ENSG00000141294	LRRC46	FALSE	20645987	0.916667	0.0142857
chr4	144434616	144478639	ENSG00000153147	SMARCA5	FALSE	46665637	0.738095	0.0214286
chr6	136878185	137113656	ENSG00000197442	MAP3K5	FALSE	33991411	0.836319	0.1
chr8	142402093	142441620	ENSG00000184489	PTP4A3	FALSE	3912402	0.880952	0.00714286
chr15	96831280	96831660	ENSG00000205148		FALSE	5689732	1	0.0214286
chr15	54305101	54920806	ENSG00000137766	UNC13C	FALSE	34305101	0.852696	0.271429
chr4	165878100	165880273	ENSG00000250486	FAM218A	FALSE	25264003	0.666667	NA
chr6	149721495	149722177	ENSG00000177688	SUMO4	FALSE	21382890	NA	NA
chr8	146024261	146036554	ENSG00000197363	ZNF517	FALSE	317468	0.888889	0.0142857
chr1	150121373	150136916	ENSG00000023902	PLEKHO1	FALSE	25585939	0.862745	0.0285714
chr15	96869167	96883492	ENSG00000185551	NR2F2	FALSE	5637900	0.764706	NA
chr11	9685624	9774538	ENSG00000133789	SWAP70	FALSE	9675624	0.686275	0.00714286
chr4	165953105	165962896	ENSG00000176979	TRIM60	FALSE	25181380	0.865979	0.0642857
chr19	55434877	55477680	ENSG00000167634	NLRP7	FALSE	3641303	0.896947	0.192857
chr5	131877136	131892530	ENSG00000113525	IL5	FALSE	49012730	0.803279	0.00714286
chr11	1575274	1593150	ENSG00000184545	DUSP8	FALSE	1565274	0.793651	0.0214286
chr11	107461817	107537505	ENSG00000110675	ELMOD1	FALSE	27459011	0.848739	0.0642857
chr18	48494410	48611415	ENSG00000141646	SMAD4	TRUE	29455833	0.705882	0.00714286
chr11	65764016	65769647	ENSG00000175376	EIF1AD	FALSE	11119811	0.888889	NA
chr5	110831731	110848288	ENSG00000164211	STARD4	FALSE	61426090	0.795082	0.05
chr19	18683030	18718551	ENSG00000006016	CRLF1	FALSE	5963231	0.88189	NA
chr19	43084393	43099207	ENSG00000124469	CEACAM8	FALSE	15402611	0.90303	0.0357143
chr4	156263810	156298122	ENSG00000164114	MAP9	FALSE	34846154	0.815287	0.05
chr4	165995574	166129701	ENSG00000170088	TMEM192	FALSE	25014575	0.800535	0.0214286
chr21	34931848	34961014	ENSG00000159147	DONSON	FALSE	13158881	0.545455	0.0214286
chr2	175612320	175629200	ENSG00000138435	CHRNA1	FALSE	67560173	0.868421	0.0428571
chr15	65734801	65810042	ENSG00000074603	DPP8	FALSE	36711350	0.687075	0.0285714
chr11	63742079	63744015	ENSG00000176340	COX8A	FALSE	9097874	1	NA
chr6	149768794	149806197	ENSG00000178199	ZC3H12D	FALSE	21298870	0.871795	0.0357143
chr3	12525931	12581122	ENSG00000154743	TSEN2	FALSE	12515931	0.880342	0.0142857
chr2	96068469	96082364	ENSG00000115042	FAHD2A	FALSE	742298	0.857143	NA
chr6	36839646	36896740	ENSG00000198663	C6orf89	FALSE	21933426	0.820106	0.0214286
chr2	68870721	68882708	ENSG00000169618	PROKR1	FALSE	23443463	0.863014	0.0357143
chr15	96904487	96904900	ENSG00000268484		FALSE	5616492	1	0.0142857
chr7	99425636	99463718	ENSG00000021461	CYP3A43	FALSE	38371305	0.885593	0.0714286
chr17	27071002	27077974	ENSG00000076604	TRAF4	FALSE	1807996	0.857143	NA
chr15	97326619	97328845	ENSG00000185594	SPATA8	FALSE	5192547	1	0.0642857
chr6	154475631	154677926	ENSG00000074706	IPCEF1	FALSE	16427141	0.840376	0.0285714
chr19	41856758	41930906	ENSG00000255730		FALSE	14174976	0.798165	0.0142857
chr2	227867427	228028829	ENSG00000081052	COL4A4	FALSE	15160544	0.871345	0.25
chr11	63742092	63755818	ENSG00000256100		FALSE	9097887	0.857143	NA
chr16	451826	462487	ENSG00000242612	DECR2	FALSE	441826	0.827586	NA
chr11	1605572	1606513	ENSG00000205869	KRTAP5-1	FALSE	1595572	1	NA
chr5	23507264	23528706	ENSG00000164256	PRDM9	FALSE	22876935	0.89959	0.271429
chr11	1618409	1619524	ENSG00000205867	KRTAP5-2	FALSE	1608409	1	0.00714286
chr4	128886461	128960866	ENSG00000164074	C4orf29	FALSE	62183410	0.767045	0.0142857
chr19	43225790	43244721	ENSG00000221826	PSG3	FALSE	15544008	0.910653	0.114286
chr10	38238500	38265561	ENSG00000175395	ZNF25	FALSE	989374	0.714286	0.0285714
chr7	140218220	140373793	ENSG00000146966	DENND2A	FALSE	18754870	0.853448	0.0785714
chr6	7881755	8064597	ENSG00000259040	BLOC1S5-TXNDC5	FALSE	7871755	0.818689	NA
chr13	28712643	28869475	ENSG00000152520	PAN3	FALSE	9712643	0.688525	0.00714286
chr19	18699495	18703146	ENSG00000006015	C19orf60	FALSE	5978636	0.75	NA
chr4	108968701	109090112	ENSG00000138795	LEF1	TRUE	56308584	0.719626	0.0142857
chr17	26684604	26708716	ENSG00000244045	TMEM199	FALSE	1421598	0.822581	0.0142857
chr15	98285448	98417780	ENSG00000251209	LINC00923	FALSE	4103612	0.888408	0.00714286
chr6	44355262	44418163	ENSG00000096401	CDC5L	FALSE	14412003	0.823944	0.0214286
chr3	41288090	42003922	ENSG00000168038	ULK4	FALSE	41278090	0.8065	0.0571429
chr19	41856816	41889988	ENSG00000142046	TMEM91	FALSE	14175034	0.8	NA
chr15	98462784	98517068	ENSG00000140450	ARRDC4	FALSE	4004324	0.825243	0.0285714
chr17	43699267	43913194	ENSG00000120088	CRHR1	FALSE	18436261	0.881579	0.0714286
chr1	22890057	22930087	ENSG00000070886	EPHA8	FALSE	22880057	0.90625	0.0785714
chr3	1134260	1445901	ENSG00000134115	CNTN6	FALSE	1124260	0.822274	0.185714
chr6	33239787	33244287	ENSG00000231500	RPS18	FALSE	25585879	0.864865	NA
chr11	63753325	63769283	ENSG00000167770	OTUB1	FALSE	9109120	0.888889	NA
chr22	28374004	29075853	ENSG00000100154	TTC28	FALSE	12374004	0.791873	0.0642857
chr11	65769550	65771620	ENSG00000175334	BANF1	FALSE	11125345	0.875	NA
chr2	23729913	23747214	ENSG00000224361		FALSE	23719913	0.8	NA
chr6	143857982	144152322	ENSG00000112419	PHACTR2	FALSE	26952745	0.845254	0.0785714
chr4	166128770	166244308	ENSG00000109466	KLHL2	FALSE	24899968	0.695082	0.0142857
chr16	28996147	29002104	ENSG00000213658	LAT	FALSE	6333697	1	0.0357143
chr1	46669006	46686933	ENSG00000171357	LURAP1	FALSE	46659006	0.820513	NA
chr2	112895962	112945791	ENSG00000144152	FBLN7	FALSE	17569791	0.826087	0.0142857
chr6	8013800	8064647	ENSG00000188428	BLOC1S5	FALSE	8003800	0.761905	NA
chr15	28947100	28983530	ENSG00000188626	GOLGA8M	FALSE	8947100	0.824074	0.0214286
chr15	55473004	55489265	ENSG00000137876	RSL24D1	FALSE	35473004	0.7	NA
chr10	131308884	131309525	ENSG00000268421		FALSE	4215222	1	0.00714286
chr2	203070903	203103331	ENSG00000116030	SUMO1	FALSE	40086042	0.810127	NA
chr12	83080659	83528649	ENSG00000179104	TMTC2	FALSE	45223965	0.709812	0.0428571
chr11	9800214	10315754	ENSG00000133812	SBF2	FALSE	9790214	0.771556	0.0214286
chr17	48445218	48450575	ENSG00000108826	MRPL27	FALSE	23182212	0.636364	NA
chr15	98980391	99057611	ENSG00000185087	FAM169B	FALSE	3463781	0.858362	0.0142857
chr4	147096837	147121152	ENSG00000164167	LSM6	FALSE	44023124	0.803571	NA
chr2	23971534	24149984	ENSG00000119778	ATAD2B	FALSE	23961534	0.768802	0.0285714
chr19	18718240	18731849	ENSG00000105696	TMEM59L	FALSE	5949933	0.95122	0.00714286
chr15	42273780	42343388	ENSG00000188089	PLA2G4E	FALSE	22273780	0.931925	0.05
chr17	60778675	60885705	ENSG00000173838	2021-03-10	FALSE	35515669	0.876872	0.135714
chr10	131633547	131762105	ENSG00000108001	EBF3	FALSE	3762642	0.874783	0.05
chr2	68906733	69053965	ENSG00000163219	ARHGAP25	FALSE	23272206	0.837531	0.0642857
chr11	64570982	64578766	ENSG00000133895	MEN1	TRUE	9926777	0.869565	0.0285714
chr11	65779312	65780976	ENSG00000175315	CST6	FALSE	11135107	1	NA
chr5	156512843	156569880	ENSG00000135077	HAVCR2	FALSE	24335380	0.850144	0.0357143
chr10	94353043	94415150	ENSG00000138160	KIF11	FALSE	41109597	0.765306	0.00714286
chr14	96671181	96730266	ENSG00000258691		FALSE	10609274	0.895495	0.0214286
chr1	46713360	46744145	ENSG00000085999	RAD54L	FALSE	46703360	0.765625	0.0285714
chr7	150521715	150558592	ENSG00000002726	AOC1	FALSE	8570071	0.895582	0.0857143
chr2	102508955	102511150	ENSG00000233404		FALSE	7182784	0.666667	0.00714286
chr11	626431	627143	ENSG00000070031	SCT	FALSE	616431	1	NA
chr14	96722161	96735304	ENSG00000100739	BDKRB1	FALSE	10604236	0.895833	0.0428571
chr17	68049570	68131749	ENSG00000153822	KCNJ16	FALSE	42786564	0.816626	0.0142857
chr11	65784223	65793988	ENSG00000175294	CATSPER1	FALSE	11140018	0.892857	0.05
chr21	34947431	34947645	ENSG00000268265		FALSE	13172250	1	NA
chr11	107462471	107463949	ENSG00000268467		FALSE	27532567	0.75	NA
chr21	34956993	35284635	ENSG00000249209		FALSE	12835260	0.823715	NA
chr11	1628795	1629693	ENSG00000196224	KRTAP5-3	FALSE	1618795	1	0.0357143
[truncated: 17,434 more rows]
